# Supplementary material for: The Transcriptome of Brassica napus L. Roots under Waterlogging at the Seedling Stage
Source: Int J Mol Sci. 2013 Jan 28;14(2):2637–51. doi: 10.3390/ijms14022637 (PMC3588007; doi:10.3390/ijms14022637)
Supplement: Supplementary File 2 — Supplementary Table 1 (XLS, 1057 KB) [file ijms-14-02637-s002.xls]

## Sheet: Sheet1
GeneID	0h-RPKM	12h-RPKM	log2 Ratio(12h/0h)	P-value	FDR	GIa	Functiona	E value	GO
Bra000005	74.0379	28.1157	-1.39689	1.81102e-61	1.85356e-60	XP_002881515.1	hypothetical protein ARALYDRAFT_482750	2.16822e-169	unkown funciton
Bra000018	20.7731	54.5817	1.3937	4.54526e-13	1.78991e-12	BAJ33839.1	unnamed protein product	1.70278e-163	unkown funciton
Bra000034	52.7998	11.6281	-2.18292	4.26176e-54	4.03351e-53	XP_002879721.1	ribosome biogenesis regulatory protein family protein	2.62694e-119	translation regulation
Bra000035	31.5996	4.63889	-2.76805	5.55542e-107	8.11905e-106	BAJ33734.1	unnamed protein product	0	unkown funciton
Bra000047	17.8015	37.8405	1.08793	2.26042e-13	9.35727e-13	NP_565885.1	CXIP2 (CAX-INTERACTING PROTEIN 2); electron carrier/ protein disulfide oxidoreductase	7.12366e-129	oxidation reduction
Bra000056	62.9681	23.3604	-1.43056	3.26778e-26	2.0219e-25	XP_002881589.1	prenylated rab acceptor family protein	1.29808e-88	transporter facilitation
Bra000060	103.631	12.0224	-3.10766	1.36142e-226	2.96551e-225	BAJ33985.1	unnamed protein product	0	unkown funciton
Bra000064	60.8742	24.6588	-1.30373	1.27327e-45	1.08165e-44	ACI14397.1	WRKY33-1 transcription factor	0	transcription regulation
Bra000084	26.5773	12.5075	-1.0874	4.39424e-13	1.73772e-12	NP_181401.1	ethanolamine-phosphate cytidylyltransferase	1.26076e-153	lipid metabolism
Bra000102	53.5813	26.3612	-1.02332	4.26794e-22	2.42419e-21	BAJ34147.1	unnamed protein product	3.71525e-59	unkown funciton
Bra000111	425.835	119.059	-1.83862	6e-308	1.4637e-306	ABL97985.1	water channel protein	7.87498e-157	transporter facilitation
Bra000114	20.3773	2.28502	-3.15668	0	0	NP_001077971.1	SYD (SPLAYED); ATPase/ chromatin binding	0	Energy
Bra000115	113.725	339.232	1.57672	2.9008e-12	1.03987e-11	BAJ34530.1	unnamed protein product	3.76956e-113	unkown funciton
Bra000118	42.8714	102.455	1.2569	0	0	XP_002881632.1	hypothetical protein ARALYDRAFT_482935	1.02034e-94	unkown funciton
Bra000126	39.6314	7.44493	-2.41231	2.05724e-164	3.88032e-163	XP_002881640.1	RNA binding protein	0	DNA or RNA binding
Bra000132	13.7589	70.4412	2.35605	0	0	XP_002879795.1	esterase/lipase/thioesterase family protein	2.86032e-168	lipid metabolism
Bra000136	10.5299	1.65252	-2.67175	1.8346e-59	1.84054e-58	AAM19777.1	At2g39480/F12L6.14	0	unkown funciton
Bra000143	31.1212	74.6291	1.26184	1.08091e-12	4.04178e-12	XP_002881672.1	hypothetical protein ARALYDRAFT_903223	2.29414e-120	unkown funciton
Bra000144	12.1117	25.5668	1.07787	0	0	XP_002881673.1	hypothetical protein ARALYDRAFT_482998	0	unkown funciton
Bra000145	25.514	8.18789	-1.63973	1.44002e-38	1.09852e-37	XP_002881674.1	dehydration-responsive family protein	0	universal stress related
Bra000154	24.8859	75.1403	1.59426	0	0	NP_181518.1	PROT1 (PROLINE TRANSPORTER 1); L-proline transmembrane transporter/ amino acid transmembrane transporter	0	transporter facilitation
Bra000158	44.9931	99.0887	1.13902	0	0	AAO00756.1	Unknown protein	0	unkown funciton
Bra000166	5.93935	14.8339	1.32052	2.48912e-13	1.02061e-12	XP_002881696.1	hypothetical protein ARALYDRAFT_483048	0	unkown funciton
Bra000170	36.5404	127.349	1.80122	0	0	BAJ34526.1	unnamed protein product	9.7773e-44	unkown funciton
Bra000178	80.3705	191.732	1.25435	4.85612e-13	1.90341e-12	ABK28529.1	unknown	2.67653e-77	unkown funciton
Bra000181	41.8593	10.2519	-2.02966	4.39118e-71	4.92012e-70	NP_565926.1	dehydration-responsive family protein	0	universal stress related
Bra000201	28.7193	9.10633	-1.65708	3.1805e-51	2.90512e-50	XP_002881735.1	heat repeat-containing protein	0	others
Bra000211	67.7905	631.53	3.2197	0	0	NP_850337.1	CYP98A3 (cytochrome P450, family 98); monooxygenase/ p-coumarate 3-hydroxylase	0	oxidation reduction
Bra000214	315.277	42.6088	-2.88739	4.88782e-202	1.01024e-200	XP_002879035.1	calmodulin-2	1.91777e-80	signal transduction
Bra000220	23.0194	2.31708	-3.31247	7.41042e-178	1.45176e-176	XP_002879916.1	hypothetical protein ARALYDRAFT_483191	0	unkown funciton
Bra000227	137.222	532.669	1.95672	0	0	BAJ34324.1	unnamed protein product	1.88882e-47	unkown funciton
Bra000236	7.95973	1.18763	-2.74463	1.14991e-60	1.16683e-59	NP_850354.2	ATPase, coupled to transmembrane movement of substances / amino acid transmembrane transporter	0	transporter facilitation
Bra000238	30.8635	7.08008	-2.12406	2.76128e-89	3.58585e-88	AAC31606.1	villin 2	0	unkown funciton
Bra000240	42.1967	11.0725	-1.93015	1.17921e-87	1.51471e-86	AAC02770.1	expressed protein	0	unkown funciton
Bra000246	30.7081	68.712	1.16195	2.91322e-13	1.18176e-12	XP_002881810.1	predicted protein	3.24879e-71	unkown funciton
Bra000260	36.1729	5.71476	-2.66214	7.32356e-113	1.10836e-111	XP_002881856.1	hypothetical protein ARALYDRAFT_903619	0	unkown funciton
Bra000263	634.077	24.7963	-4.67646	0	0	AAA66068.1	low-temperature regulated protein BN115	1.30082e-64	universal stress related
Bra000265	1407.92	474.467	-1.56919	0	0	ABA01003.2	cold-regulated protein	2.03956e-65	universal stress related
Bra000268	156.158	66.7462	-1.22625	1.32051e-58	1.31487e-57	ACN73535.1	1433-2	6.54057e-144	unkown funciton
Bra000272	35.3263	118.471	1.74572	0	0	XP_002879999.1	ATMBF1A/MBF1A	8.41216e-72	unkown funciton
Bra000277	24.52	3.93037	-2.64122	7.6603e-63	7.94983e-62	NP_565989.1	ATMPK20; MAP kinase	0	kinase
Bra000279	14.6686	7.0553	-1.05595	3.17116e-14	1.44726e-13	NP_565990.1	AML2 (ARABIDOPSIS-MEI2-LIKE 2); RNA binding / nucleic acid binding / nucleotide binding	0	DNA or RNA binding
Bra000285	30.1438	63.4509	1.07378	5.74652e-13	2.23023e-12	XP_002880018.1	50S ribosomal protein L3	1.04676e-112	translation regulation
Bra000293	36.9011	3.27514	-3.49403	1.8167e-178	3.57001e-177	AAK91471.1	At2g43170/F14B2.11	0	unkown funciton
Bra000300	12.3826	25.3624	1.03438	2.74846e-12	9.86363e-12	AAK62628.1	At2g43320/T1O24.6	1.05925e-165	unkown funciton
Bra000301	9.14555	186.956	4.35348	1.18794e-13	5.13182e-13	ABF83640.1	At2g43340	1.33485e-62	unknown function
Bra000321	33.1183	3563.32	6.74945	9.31478e-13	3.51179e-12	P29108.1	STAD_BRANA RecName: Full=Acyl-	0	lipid metabolism
Bra000340	11.168	415.557	5.2176	1.73639e-13	7.31988e-13	XP_002880082.1	hypothetical protein ARALYDRAFT_483527	1.483e-23	unkown funciton
Bra000342	31.8062	322.223	3.34068	0	0	XP_002880085.1	hypothetical protein ARALYDRAFT_483537	1.3617e-158	unkown funciton
Bra000344	11.1314	43.6769	1.97224	4.10782e-14	1.85564e-13	XP_002881953.1	hypothetical protein ARALYDRAFT_483541	0	unkown funciton
Bra000358	78.7115	169.114	1.10335	5.0182e-14	2.24623e-13	NP_566023.1	senescence-associated protein-related	6.97073e-26	universal stress related
Bra000364	56.2072	191.186	1.76615	1.75415e-13	7.38696e-13	AAC32039.1	uclacyanin II	2.50299e-31	secondary metabolism
Bra000365	133.248	19.1351	-2.79982	0	0	XP_002881983.1	predicted protein	0	unkown funciton
Bra000374	17.3587	43.7071	1.33221	7.10542e-13	2.71798e-12	XP_002880161.1	hypothetical protein ARALYDRAFT_483649	4.57784e-165	unkown funciton
Bra000377	1289.29	300.464	-2.10132	0	0	NP_566036.1	protease inhibitor/seed storage/lipid transfer protein (LTP) family protein	6.55824e-40	protein degradation
Bra000382	2.79261	61.3381	4.4571	3.31068e-13	1.33031e-12	XP_002882002.1	predicted protein	0	unkown funciton
Bra000383	39.9566	12.2362	-1.70727	5.01948e-39	3.85769e-38	NP_182051.1	unknown protein	0	unkown funciton
Bra000409	14.6463	2.69174	-2.44392	5.5921e-114	8.5075e-113	XP_002880213.1	ATBRM/CHR2	0	unkown funciton
Bra000410	23.8343	72.6499	1.60792	0	0	NP_566062.1	UBC6 (ubiquitin-conjugating enzyme 6); ubiquitin-protein ligase	3.0528e-84	protein degradation
Bra000417	16.2644	35.6724	1.13309	1.31228e-13	5.62184e-13	NP_566069.1	BTB/POZ domain-containing protein	0	transcription regulation
Bra000421	9.45109	20.3093	1.10359	0	0	NP_55968.1	ATP binding / adenylyltransferase/ catalytic/ jasmonate-amino synthetase [Arabidopsis thaliana]	2.72245e-76	Energy
Bra000430	12.4714	190.187	3.93072	2.36034e-13	9.72426e-13	AAM66085.1	putative caltractin	7.55336e-57	transporter facilitation
Bra000442	59.1079	21.1419	-1.48324	1.8537e-78	2.21701e-77	ADC35526.1	boron transporter	0	transporter facilitation
Bra000445	63.1122	3.68833	-4.09688	5.56772e-262	1.28094e-260	O22899.1	Probable pre-mRNA-splicing factor ATP-dependent RNA helicase	1.86137e-174	DNA or RNA binding
Bra000451	21.5739	210.264	3.28484	0	0	XP_002880299.1	cp12 domain-containing protein 1	5.61973e-60	others
Bra000460	187.495	482.754	1.36444	2.74558e-12	9.85772e-12	BAJ33833.1	unnamed protein product	5.97516e-112	unkown funciton
Bra000472	94.6135	206.288	1.12454	1.74971e-12	6.3768e-12	XP_002879229.1	hypothetical protein ARALYDRAFT_481886	6.78728e-77	unkown funciton
Bra000474	29.5552	96.6968	1.71006	0	0	BAJ34474.1	unnamed protein product	6.29892e-115	unkown funciton
Bra000479	34.6129	81.0326	1.22719	2.78e-13	1.13232e-12	XP_002881015.1	hypothetical protein ARALYDRAFT_481802	1.07982e-42	unkown funciton
Bra000480	80.2483	23.6604	-1.76199	6.27158e-95	8.48603e-94	NP_180450.2	ankyrin repeat family protein	0	others
Bra000483	144.166	309.52	1.10231	5.15144e-14	2.30426e-13	XP_002315340.1	histone H2	1.77449e-50	universal stress related
Bra000494	52.7655	9.62776	-2.45432	4.57232e-111	6.86127e-110	XP_002879099.1	sand family protein	0	other
Bra000498	75.7706	20.3363	-1.89758	3.61408e-107	5.29396e-106	P21239.2	Full=RuBisCO large subunit-binding protein subunit alpha, chloroplastic	1.26076e-153	carbohydrate metabolism
Bra000499	25.0693	4.20672	-2.57515	2.09076e-64	2.19981e-63	AAQ22601.1	At2g27890	0	unkown funciton
Bra000503	73.7185	34.093	-1.11255	9.52044e-40	7.39879e-39	NP_180328.1	SKD1 (SUPPRESSOR OF K+ TRANSPORT GROWTH DEFECT1); ATP binding / nucleoside-triphosphatase/ nucleotide binding	0	Energy
Bra000508	250.878	71.0944	-1.81918	2.50704e-242	5.58669e-241	NP_565652.1	glycosyl hydrolase family 17 protein	0	carbohydrate metabolism
Bra000529	51.8917	18.1074	-1.51892	2.7102e-45	2.2944e-44	BAJ33758.1	unnamed protein product	0	unkown funciton
Bra000536	43.1495	13.3985	-1.68727	6.4912e-38	4.90612e-37	XP_002878991.1	glycosyl hydrolase family 17 protein	9.90709e-180	carbohydrate metabolism
Bra000539	48.377	138.159	1.51393	8.55982e-13	3.23863e-12	XP_002878995.1	SPX domain-containing protein	2.00504e-125	universal stress related
Bra000571	147.863	68.0066	-1.12051	6.67688e-50	5.98576e-49	BAJ33633.1	unnamed protein product	1.29425e-126	unkown funciton
Bra000588	17.8627	70.8685	1.98819	0	0	XP_002878525.1	hypothetical protein ARALYDRAFT_480941	4.60902e-101	unkown funciton
Bra000594	387.636	167.222	-1.21293	0	0	CAB51903.1	cellulase	0	cell wall
Bra000596	39.6844	14.8929	-1.41394	1.17955e-54	1.12236e-53	ADD09861.1	chloride channel C	0	transporter facilitation
Bra000600	36.6352	9.17178	-1.99796	6.96396e-113	1.05493e-111	XP_002865765.1	EMB1441	0	oxidation reduction
Bra000601	18.1049	47.826	1.40141	0	0	NP_568715.1	NFU2 (NIFU-LIKE PROTEIN 2); structural molecule	9.3504e-82	others
Bra000603	43.3114	17.9521	-1.27059	1.4112e-30	9.43549e-30	AAM83249.1	AT5g49970/K9P8_11	0	unkown funciton
Bra000604	24.5973	11.7361	-1.06755	2.86074e-18	1.48661e-17	XP_002865768.1	auxin F-box protein 5	0	signal transduction
Bra000614	18.317	95.5563	2.38317	4.10782e-14	1.85616e-13	ACL14903.1	L-isoaspartyl methyltransferase 2 TIS II alpha-psi	1.73705e-115	Nitrogen metabolism
Bra000617	30.9038	4.45104	-2.79557	1.41745e-122	2.26091e-121	XP_002864052.1	kelch repeat-containing protein	0	others
Bra000619	42.0543	12.5296	-1.74691	4.9597e-57	4.85822e-56	XP_002865784.1	hypothetical protein ARALYDRAFT_495092	0	unkown funciton
Bra000622	100.577	28.1484	-1.83717	1.53211e-121	2.42443e-120	XP_002866374.1	hypothetical protein ARALYDRAFT_332278	0	unkown funciton
Bra000634	25.5867	5.4038	-2.24335	1.70714e-67	1.84919e-66	XP_002874481.1	transducin family protein	0	small molecular
Bra000638	305.338	62.8437	-2.28057	0	0	ACS28249.1	BREVIPEDICELLUS	0	cell wall
Bra000641	56.4235	11.4692	-2.29853	1.09641e-195	2.23432e-194	NP_192575.2	GTA2 (GLOBAL TRANSCRIPTION FACTOR GROUP A2); structural constituent of ribosome / transcription elongation regulator/ transcription factor	0	transcription regulation
Bra000643	100.523	304.109	1.59706	5.80646e-13	2.25158e-12	NP_192563.2	glycine-rich protein	1.51262e-36	universal stress related
Bra000656	76.0907	37.7246	-1.01222	5.3176e-45	4.47803e-44	NP_192621.1	SUB1; calcium ion binding	0	small molecular
Bra000659	48.5688	168.833	1.79749	4.18998e-13	1.66106e-12	XP_002874507.1	arginase	9.78094e-176	Nitrogen metabolism
Bra000667	74.9731	4.37155	-4.10016	0	0	XP_002874494.1	ATISA3/ISA3	0	unkown funciton
Bra000670	184.951	1101.3	2.57399	6.57252e-13	2.52472e-12				no homology
Bra000681	52.9728	15.0066	-1.81965	2.06108e-70	2.29486e-69	XP_002874570.1	hypothetical protein ARALYDRAFT_489803	0	unkown funciton
Bra000690	25.2774	7.96572	-1.66597	7.59594e-36	5.56461e-35	Q56X76.2	RH39_ARATH RecName: Full=DEAD-box ATP-dependent RNA helicase 39	0	DNA or RNA binding
Bra000693	33.3114	13.8516	-1.26596	7.6466e-18	3.92507e-17	NP_192719.1	transporter-related	1.47117e-152	transporter facilitation
Bra000694	35.8623	92.5947	1.36846	0	0	XP_002872465.1	hypothetical protein ARALYDRAFT_352054	5.51255e-81	unkown funciton
Bra000698	48.4817	14.6679	-1.72478	2.52846e-44	2.10813e-43	NP_192741.1	hydrolase, alpha/beta fold family protein	6.15129e-177	unkown funciton
Bra000699	62.1323	233.99	1.91303	3.56826e-13	1.42646e-12	NP_192742.1	CYTC-2 (cytochrome c-2); electron carrier/ heme binding/ iron ion binding	8.8063e-61	transporter facilitation
Bra000710	71.0676	20.5835	-1.7877	3.54866e-53	3.32315e-52	XP_002874623.1	hypothetical protein ARALYDRAFT_911337	8.45878e-133	unkown funciton
Bra000714	19.2679	3.03734	-2.66532	6.63022e-70	7.34129e-69	XP_002874637.1	ubiquitin carboxyl-terminal hydrolase family protein	0	protein degradation
Bra000719	42.0172	7.7142	-2.44539	7.30328e-176	1.42378e-174	NP_192809.1	SPT16 (global transcription factor C)	0	transcription regulation
Bra000741	162.18	60.238	-1.42885	2.4671e-103	3.51078e-102	CAF06581.1	SGT1-like protein	5.37922e-164	others
Bra000743	32.0535	5.12133	-2.64589	1.27933e-123	2.05085e-122	XP_002874691.1	hypothetical protein ARALYDRAFT_489971	0	unkown funciton
Bra000775	30.4203	190.833	2.6492	1.82077e-14	8.41913e-14	XP_002874775.1	hypothetical protein ARALYDRAFT_490053	1.07218e-49	unkown funciton
Bra000781	257.749	124.881	-1.04541	1.73586e-37	1.30181e-36	ABL97959.1	ribosomal protein L7Ae-like	7.29766e-55	translation regulation
Bra000782	65.5744	19.0155	-1.78595	1.11552e-86	1.41863e-85	XP_002872663.1	mutant TFIIF-alpha	1.75392e-178	others
Bra000789	244.802	56.4707	-2.11604	0	0	NP_192343.1	early-responsive to dehydration protein-related / ERD protein-related	0	universal stress related
Bra000808	24.1496	5.75519	-2.06906	8.25298e-52	7.61243e-51	XP_002874819.1	N-ethylmaleimide sensitive factor	0	universal stress related
Bra000825	12.6433	128.334	3.34346	1.03917e-13	4.51603e-13	XP_002874864.1	hypothetical protein ARALYDRAFT_911855	2.88698e-136	unkown funciton
Bra000827	32.9169	14.2861	-1.20422	1.60471e-35	1.17074e-34	ADM21174.1	SRF3	0	others
Bra000840	258.139	20.3086	-3.66799	0	0	AAV92081.1	xyloglucan endotransglycosylase/hydrolase	1.86137e-174	cell wall
Bra000853	112.213	39.9193	-1.49108	2.22982e-96	3.04685e-95	Q9ZT91.1	EFTM_ARATH RecName: Full=Elongation factor Tu, mitochondrial; Flags: Precursor	0	translation regulation
Bra000854	72.6737	30.0027	-1.27634	1.30909e-45	1.11179e-44	BAJ33910.1	unnamed protein product	0	unkown funciton
Bra000857	75.4421	20.6529	-1.86903	8.78462e-87	1.1185e-85	XP_002874890.1	hypothetical protein ARALYDRAFT_490272	6.11422e-147	unkown funciton
Bra000867	61.8376	235.463	1.92894	0	0	NP_849820.1	dormancy/auxin associated family protein	3.57368e-62	secondary metabolism
Bra000868	18.4209	7.68188	-1.26181	7.75136e-24	4.57531e-23	XP_002872824.1	hypothetical protein ARALYDRAFT_490290	0	unkown funciton
Bra000871	53.9834	109.61	1.02179	3.72812e-13	1.48553e-12	NP_192171.1	vacuolar ATPase subunit F family protein	1.32686e-64	Energy
Bra000874	129.533	22.3916	-2.53228	0	0	XP_002874909.1	ATCUL1	0	protein degradation
Bra000878	60.452	9.2234	-2.71242	1.65739e-302	4.01559e-301	XP_002872834.1	AAA-type ATPase family protein	0	Energy
Bra000884	86.2221	423.016	2.29458	3.31512e-13	1.33059e-12	XP_002872843.1	hypothetical protein ARALYDRAFT_327563	7.44759e-28	unkown funciton
Bra000900	61.9516	11.6695	-2.4084	9.10486e-155	1.65573e-153	NP_192110.2	protein kinase family protein	0	kinase
Bra000912	22.8323	10.0199	-1.18821	3.8946e-15	1.85428e-14	XP_002872870.1	hypothetical protein ARALYDRAFT_490389	0	unkown funciton
Bra000913	11.7055	138.793	3.56767	5.87308e-13	2.27493e-12	XP_002872871.1	hypothetical protein ARALYDRAFT_490390	0	unkown funciton
Bra000919	15.1683	65.3582	2.1073	4.88498e-15	2.31717e-14	NP_192074.1	unknown protein	5.23683e-121	unkown funciton
Bra000928	30.3242	12.9815	-1.22401	3.45e-33	2.41334e-32	XP_002872894.1	pentatricopeptide repeat-containing protein	0	others
Bra000929	102.896	206.977	1.00829	0	0	NP_567190.1	60S acidic ribosomal protein P1 (RPP1B)	1.36333e-37	translation regulation
Bra000952	33.6871	7.79838	-2.11095	1.86425e-93	2.4898e-92	XP_002872897.1	hypothetical protein ARALYDRAFT_490443	0	unkown funciton
Bra000953	10.77	31.5519	1.55071	0	0	XP_002872896.1	ribosomal protein L5 family protein	4.31834e-127	translation regulation
Bra000959	103.471	19.326	-2.42061	1.58274e-218	3.39434e-217	NP_567184.1	dehydration-responsive protein-related	0	universal stress related
Bra000965	41.5891	10.5608	-1.97749	2.79758e-60	2.82885e-59	XP_002875020.1	hypothetical protein ARALYDRAFT_490504	0	unkown funciton
Bra000966	66.9224	157.494	1.23473	1.20348e-13	5.18354e-13	XP_002872939.1	hypothetical protein ARALYDRAFT_490509	2.69847e-38	unkown funciton
Bra000967	40.214	6.27389	-2.68027	1.13871e-99	1.58858e-98	XP_002872940.1	hypothetical protein ARALYDRAFT_912183	0	unkown funciton
Bra000969	53.3663	9.02113	-2.56455	1.02219e-93	1.37265e-92	XP_002872948.1	hypothetical protein ARALYDRAFT_912194	0	unkown funciton
Bra000972	6.71086	1.34089	-2.3233	1.81105e-51	1.66041e-50	XP_002875025.1	predicted protein	0	unkown funciton
Bra000977	101.085	362.626	1.84291	4.0834e-13	1.62102e-12	BAH20099.1	AT4G00355	4.3639e-53	unkown funciton
Bra000993	54.8556	8.45184	-2.6983	8.27902e-177	1.61796e-175	XP_002882168.1	hypothetical protein ARALYDRAFT_477342	0	unkown funciton
Bra000996	22.339	9.35434	-1.25585	2.04586e-28	1.31715e-27	AAF01550.1	AC009325_20 unknown protein	0	unkown funciton
Bra000997	14.1148	61.8971	2.13267	7.5051e-14	3.29883e-13	XP_002884269.1	hypothetical protein ARALYDRAFT_896079	0	unkown funciton
Bra000999	23.7837	3.35933	-2.82373	7.58694e-84	9.47863e-83	AAN72146.1	putative cell division control protein	0	others
Bra001004	124.467	44.7383	-1.47618	8.00998e-147	1.41238e-145	XP_002882175.1	hypothetical protein ARALYDRAFT_477362	0	unkown funciton
Bra001010	263.973	119.16	-1.14749	5.60572e-93	7.46486e-92	AAW22621.1	outer mitochondrial membrane protein porin 1	1.64117e-132	unkown funciton
Bra001017	26.9611	63.6745	1.23984	4.8539e-13	1.90277e-12	XP_002884289.1	nucleic acid binding protein	2.34523e-95	transcription regulation
Bra001035	32.1779	72.3166	1.16825	4.54526e-13	1.79013e-12	NP_566166.1	SP1L3 (SPIRAL 1-LIKE3)	4.9476e-25	others
Bra001036	62.9124	25.8869	-1.28112	1.7484e-40	1.37652e-39	NP_186869.2	proteasome family protein	0	protein degradation
Bra001037	203.769	90.4871	-1.17115	9.86754e-96	1.34085e-94	NP_186872.1	RGP1 (REVERSIBLY GLYCOSYLATED POLYPEPTIDE 1); cellulose synthase (UDP-forming)	0	cell wall
Bra001040	83.6657	31.8594	-1.39292	1.14824e-77	1.36257e-76	XP_002882224.1	hypothetical protein ARALYDRAFT_477468	0	unkown funciton
Bra001046	1097.04	224.685	-2.28764	0	0	Q9SDM8.1	DCAM3_BRAJU RecName: Full=S-adenosylmethionine decarboxylase proenzyme 3; Short=AdoMetDC 3; Short=SAMDC 3; Contains: RecName: Full=S-adenosylmethionine decarboxylase 3 alpha chain; Contains: RecName: Full=S-adenosylmethionine decarboxylase 3 beta chain; Flags: Precursor	0	others
Bra001049	116.885	344.529	1.55953	4.66738e-13	1.83438e-12	NP_566174.1	GRF7 (GENERAL REGULATORY FACTOR 7); protein binding/protein phosphorylated amino acid binding	7.19791e-135	transcription regulation
Bra001050	130.42	34.3023	-1.92679	1.42559e-140	2.4594e-139	XP_002884326.1	hypothetical protein ARALYDRAFT_477488	8.56877e-145	unkown funciton
Bra001056	10.5845	118.138	3.48044	0	0	XP_002882242.1	hypothetical protein ARALYDRAFT_477497	2.63559e-126	unkown funciton
Bra001061	45.0201	8.00101	-2.49232	8.07158e-142	1.3955e-140	NP_186925.4	ATP binding / aminoacyl-tRNA ligase/ histidine-tRNA ligase/ nucleotide binding	0	translation regulation
Bra001063	21.1523	73.1156	1.78936	1.31894e-13	5.64885e-13	XP_002884339.1	hypothetical protein ARALYDRAFT_477520	4.76128e-135	unkown funciton
Bra001078	110.594	31.5293	-1.81051	1.20698e-137	2.06441e-136	XP_002884382.1	CYP89A9	0	oxidation reduction
Bra001090	100.831	7.31451	-3.78503	0	0	BAJ33898.1	unnamed protein product	0	unkown funciton
Bra001092	10.7965	26.6401	1.30303	0	0	XP_002882315.1	hypothetical protein ARALYDRAFT_477638	1.55859e-134	unkown funciton
Bra001094	64.047	6.85748	-3.22338	3.60996e-167	6.89043e-166	XP_002882322.1	hypothetical protein ARALYDRAFT_477651	0	unkown funciton
Bra001111	50.2195	21.6082	-1.21667	1.51676e-28	9.79666e-28	AAX51268.1	unnamed protein product	1.95598e-178	unkown funciton
Bra001114	37.8471	14.2749	-1.40671	2.3397e-34	1.67033e-33	XP_002882364.1	tRNA synthetase class I family protein	0	translation regulation
Bra001123	24.0271	1402.67	5.86737	5.86198e-14	2.61111e-13	XP_002884464.1	hypothetical protein ARALYDRAFT_477741	2.41255e-97	unkown funciton
Bra001137	11.3453	46.2233	2.02653	4.13002e-14	1.86198e-13	XP_002882393.1	hypothetical protein ARALYDRAFT_317378	2.30298e-147	unkown funciton
Bra001139	34.1831	94.8275	1.47202	5.81978e-13	2.25592e-12	NP_566249.1	ATL6; protein binding /zinc ion binding	9.60057e-118	transporter facilitation
Bra001152	52.5815	26.1627	-1.00704	2.66494e-24	1.58443e-23	BAB21595.1	Tat binding protein like protein	0	others
Bra001153	12.4178	48.6168	1.96904	5.86198e-14	2.61184e-13	AAY57597.1	RING finger family protein	2.80432e-138	transcription regulation
Bra001154	376.962	776.065	1.04176	5.24914e-12	1.83996e-11	XP_002882425.1	60S ribosomal protein L22-2	2.30893e-45	translation regulation
Bra001156	67.2522	150.655	1.1636	0	0	XP_002882427.1	hypothetical protein ARALYDRAFT_477850	1.1547e-99	unkown funciton
Bra001163	10.9932	2.50053	-2.1363	9.36488e-88	1.20342e-86	NP_187219.5	EMB2016 (embryo defective 2016)	0	others
Bra001164	108.899	11.4874	-3.24487	4.38634e-147	7.74718e-146	BAJ34077.1	unnamed protein product	1.13589e-128	unkown funciton
Bra001174	90.1898	23.6203	-1.93294	4.39074e-135	7.43817e-134	NP_198008.1	chaperonin, putative	0	others
Bra001177	40.2105	16.4553	-1.28902	1.25284e-43	1.03217e-42	CAA96522.1	AMP-binding protein	0	others
Bra001186	19.5686	52.6615	1.42821	0	0	XP_002884563.1	ATBPM2	0	others
Bra001200	18.1054	5.52919	-1.71128	9.05882e-45	7.58258e-44	Q9SQV1.1	RH40_ARATH RecName: Full=DEAD-box ATP-dependent RNA helicase 40	0	DNA or RNA binding
Bra001201	19.17	39.3876	1.03889	5.10702e-15	2.41747e-14	ABA25867.1	mitochondrial pyruvate dehydrogenase kinase	0	kinase
Bra001220	22.4864	86.7565	1.94792	2.26486e-14	1.04213e-13	XP_002884612.1	DIN3/LTA1	0	others
Bra001221	57.4347	15.798	-1.86218	2.53516e-107	3.72037e-106	O49809.2	MFPA_BRANA RecName: Full=Glyoxysomal fatty acid beta-oxidation multifunctional protein MFP-a;	0	lipid metabolism
Bra001232	59.7641	5.31301	-3.49168	4.4311e-178	8.69154e-177	XP_002884623.1	GTP-binding family protein	0	small molecular
Bra001235	13.6326	5.16932	-1.39902	2.53078e-23	1.47743e-22	Q9SFU0.2	SC24A_ARATH RecName: Full=Protein transport protein Sec24-like At3g07100	0	transporter facilitation
Bra001246	14.841	7.37942	-1.00801	4.2664e-12	1.50723e-11	XP_002884643.1	hypothetical protein ARALYDRAFT_478055	0	unkown funciton
Bra001247	51.8349	17.7212	-1.54845	3.34222e-48	2.9369e-47	XP_002862652.1	armadillo/beta-catenin repeat family protein	0	signal transduction
Bra001249	316.063	48.9062	-2.69212	0	0	ABS30419.1	CIL1	4.99957e-93	others
Bra001273	9.60629	54.7736	2.51143	7.63834e-14	3.35509e-13	NP_566322.1	F-box family protein	0	protein degradation
Bra001276	51.1349	116.129	1.18334	2.12496e-13	8.82627e-13	XP_002884672.1	hypothetical protein ARALYDRAFT_896962	1.07582e-18	unkown funciton
Bra001286	34.3254	6.98651	-2.29663	9.6987e-170	1.86684e-168	EAY81974.1	hypothetical protein OsI_37152	0	unkown funciton
Bra001289	20.6965	7.39267	-1.48522	9.66324e-25	5.78942e-24	XP_002884774.1	L-O-methylthreonine resistant 1	0	Nitrogen metabolism
Bra001291	99.1404	4711.41	5.57054	0	0	XP_002884771.1	hypothetical protein ARALYDRAFT_897178	1.50379e-51	unkown funciton
Bra001297	127.798	24.9146	-2.3588	0	0	NP_187595.1	CDC48 (CELL DIVISION CYCLE 48); ATPase/ identical protein binding	0	Energy
Bra001342	18.6699	3.09236	-2.59394	8.6236e-98	1.19108e-96	NP_566335.1	RAPTOR1; nucleotide binding / protein binding	0	transcription regulation
Bra001350	26.2935	198.349	2.91527	8.89954e-13	3.36159e-12	NP_974256.1	metal transporter family protein	0	transporter facilitation
Bra001351	82.5943	202.299	1.29238	3.17524e-14	1.44829e-13	AAP21180.1	At3g08610	1.63358e-22	unkown funciton
Bra001355	23.6536	7.1408	-1.7279	3.6736e-55	3.51541e-54	NP_187647.2	APUM4 (Arabidopsis Pumilio 4); RNA binding / binding	0	DNA or RNA binding
Bra001359	97.3831	31.4642	-1.62996	5.9117e-107	8.63579e-106	AAB04606.1	carboxypeptidase Y-like protein	0	protein degradation
Bra001372	55.3907	9.71346	-2.51159	1.26279e-271	2.94986e-270	XP_002884804.1	predicted protein	0	unkown funciton
Bra001376	25.375	8.35728	-1.60231	2.0163e-30	1.34419e-29	BAJ34209.1	unnamed protein product	5.76716e-153	unkown funciton
Bra001391	57.1201	4.79038	-3.57579	0	0	EAY81974.1	hypothetical protein OsI_37152	0	unkown funciton
Bra001399	15.2139	44.1271	1.53627	9.74776e-14	4.24833e-13	NP_187741.2	leucine-rich repeat family protein	0	universal stress related
Bra001408	12.5439	5.78176	-1.1174	4.0341e-15	1.91955e-14	NP_187761.1	SPY (SPINDLY); protein N-acetylglucosaminyltransferase/ protein binding / transferase, transferring glycosyl groups	0	others
Bra001416	25.3516	8.92643	-1.50592	6.55468e-36	4.80401e-35	XP_002884859.1	hypothetical protein ARALYDRAFT_478516	0	unkown funciton
Bra001423	30.7789	5.30621	-2.53619	1.78914e-65	1.90125e-64	AAL49938.1	AT3g11830/F26K24_12	0	unkown funciton
Bra001425	18.1803	56.0787	1.62507	5.89972e-13	2.28303e-12	BAJ34452.1	unnamed protein product	0	unkown funciton
Bra001426	51.7472	5.50644	-3.23229	2.2091e-273	5.18319e-272	XP_002884872.1	hypothetical protein ARALYDRAFT_317971	0	unkown funciton
Bra001435	28.2457	8.81552	-1.67991	8.046e-38	6.0755e-37	NP_187808.3	unknown protein	0	unkown funciton
Bra001449	32.5103	221.514	2.76843	1.66311e-13	7.02676e-13	XP_002882774.1	hypothetical protein ARALYDRAFT_897442	1.36419e-96	unkown funciton
Bra001461	62.9673	144.735	1.20074	0	0	XP_002882783.1	hypothetical protein ARALYDRAFT_478622	3.66259e-62	unkown funciton
Bra001467	81.1364	198.244	1.28885	0	0	XP_002882787.1	LEM3 (ligand-effect modulator 3) family protein	5.38737e-169	lipid metabolism
Bra001500	46.3723	5.69309	-3.02598	0	0	NP_187941.5	binding	0	unkown funciton
Bra001501	91.3041	27.5054	-1.73096	2.00456e-96	2.74257e-95	XP_002882817.1	WD-40 repeat family protein	0	unkown funciton
Bra001506	78.0402	17.6473	-2.14477	2.7469e-153	4.96979e-152	NP_187955.2	ECT2; protein binding	0	unkown funciton
Bra001510	17.6298	4.45839	-1.98342	2.02544e-67	2.19323e-66	XP_002884970.1	MAPKKK7	0	universal stress related
Bra001516	54.3336	145.374	1.41986	5.40012e-13	2.10244e-12	NP_187974.1	disease resistance response	4.22181e-70	universal stress related
Bra001521	31.5189	8.86434	-1.83013	8.72806e-52	8.03903e-51	BAB01926.1	multispanning membrane protein-like	0	others
Bra001525	119.863	19.3897	-2.62802	0	0	XP_002884994.1	hypothetical protein ARALYDRAFT_478791	0	unkown funciton
Bra001541	163.157	45.8844	-1.83019	3.24278e-144	5.66785e-143	BAJ33606.1	unnamed protein product	1.55976e-115	unkown funciton
Bra001542	53.8478	2.90701	-4.21128	1.15867e-241	2.58018e-240	XP_002885025.1	hypothetical protein ARALYDRAFT_478841	0	unkown funciton
Bra001545	13.1564	2.72363	-2.27216	1.96938e-77	2.33092e-76	XP_002882874.1	phosphatidylinositol-4-phosphate 5-kinase family protein	0	kinase
Bra001548	61.3619	124.033	1.0153	2.88658e-15	1.37887e-14	ACF23027.1	ST45-109	8.13589e-22	unkown funciton
Bra001570	30.1003	8.9502	-1.74979	2.61508e-36	1.92591e-35	NP_188104.2	NHL repeat-containing protein	0	others
Bra001578	59.1523	22.5942	-1.38848	1.622e-38	1.23705e-37	XP_002882907.1	hypothetical protein ARALYDRAFT_478926	5.10049e-72	unkown funciton
Bra001582	18.8315	55.3699	1.55596	0	0	NP_566498.1	zinc finger (C3HC4-type RING finger) family protein	5.14209e-114	transcription regulation
Bra001588	109.854	22.3011	-2.3004	1.20697e-78	1.44677e-77	NP_188139.1	ERF4 (ETHYLENE RESPONSIVE ELEMENT BINDING FACTOR 4); DNA binding / protein binding / transcription factor/ transcription repressor	2.55867e-67	transcription regulation
Bra001595	53.2995	7.87143	-2.75942	5.13098e-70	5.68718e-69	XP_002885088.1	brix domain-containing protein	8.79004e-160	others
Bra001607	19.6025	122.449	2.64307	3.35288e-14	1.52583e-13	XP_002882965.1	hypothetical protein ARALYDRAFT_897881	1.74566e-121	unkown funciton
Bra001613	16.6317	2.88206	-2.52876	1.57815e-70	1.76022e-69	NP_851003.2	protein binding	0	unkown funciton
Bra001616	17.1477	36.4501	1.08791	6.28164e-13	2.42143e-12	BAH19460.1	AT3G15980	9.07399e-112	unkown funciton
Bra001636	45.3665	136.556	1.58979	2.13828e-13	8.87928e-13	XP_002883013.1	hypothetical protein ARALYDRAFT_897975	1.35106e-53	unkown funciton
Bra001637	1230.45	2714.38	1.14144	2.56262e-11	8.62208e-11	Q944W6.1	Translationally-controlled tumor protein homolog	6.55183e-24	translation regulation
Bra001642	41.0427	10.7504	-1.93274	4.83322e-51	4.40592e-50	XP_002883030.1	hypothetical protein ARALYDRAFT_318449	0	unkown funciton
Bra001645	22.4543	7.14281	-1.65243	1.41778e-31	9.64917e-31	XP_002885179.1	hypothetical protein ARALYDRAFT_479163	0	unkown funciton
Bra001658	34.7449	70.8984	1.02895	9.2399e-09	2.71043e-08	NP_566572.1	unknown protein	1.08105e-42	unkown funciton
Bra001661	283.014	97.1076	-1.54322	2.9158e-219	6.26583e-218	Q9FUZ1.1	S-adenosylmethionine synthase 2	4.0097e-121	Nitrogen metabolism
Bra001665	10.1563	30.8603	1.60338	0	0	NP_566580.1	CIPK1 (CBL-INTERACTING PROTEIN KINASE 1); kinase/ protein binding	0	kinase
Bra001688	32.8805	11.1837	-1.55584	3.9836e-55	3.81091e-54	AAK32754.1	AF361586_1 AT3g17900/MEB5_12	0	unkown funciton
Bra001695	14.0673	42.1164	1.58204	0	0	XP_002885237.1	hypothetical protein ARALYDRAFT_479290	2.9565e-108	unkown funciton
Bra001701	144.762	470.256	1.69977	0	0	NP_188456.1	protease inhibitor/seed storage/lipid transfer protein (LTP) family protein	5.87572e-17	protein degradation
Bra001713	45.044	6.05799	-2.89442	8.08508e-118	1.25391e-116	Q9LIH9.1	RH51_ARATH RecName: Full=DEAD-box ATP-dependent RNA helicase 51	0	DNA or RNA binding
Bra001726	28.0807	4.407	-2.67171	1.75074e-83	2.17789e-82	XP_002883155.1	transducin family protein	0	small molecular
Bra001739	10.3634	81.4969	2.97525	1.19238e-13	5.14266e-13	XP_002878504.1	kelch repeat-containing F-box family protein	4.50068e-168	protein degradation
Bra001773	58.1766	13.2849	-2.13065	1.5847e-97	2.1831e-96	NP_188640.1	ATTCP-1; ATP binding / protein binding / unfolded protein binding	0	Energy
Bra001774	29.8569	6.62297	-2.17251	1.37768e-51	1.26527e-50	AAM62586.1	cytochrome P450, putative	1.21523e-163	oxidation reduction
Bra001789	48.566	7.17511	-2.75888	2.37288e-108	3.50964e-107	XP_002883243.1	calmodulin-domain protein kinase 9	0	kinase
Bra001797	29.5486	5.97191	-2.30682	4.07232e-82	5.01897e-81	NP_566666.2	UBP14 (UBIQUITIN-SPECIFIC PROTEASE 14); ubiquitin-specific protease	0	protein degradation
Bra001802	71.9395	30.8389	-1.22203	2.10362e-59	2.10976e-58	NP_188713.1	EIN3 (ETHYLENE-INSENSITIVE3); transcription factor	0	transcription regulation
Bra001813	9.41029	57.4503	2.61	4.88498e-15	2.31889e-14	XP_002894322.1	hypothetical protein ARALYDRAFT_474268	3.28727e-175	unkown funciton
Bra001817	15.547	41.5874	1.41951	7.21644e-14	3.18115e-13	AAL91161.1	MAP kinase kinase 5	3.70334e-134	kinase
Bra001822	45.1659	127.716	1.49963	6.95888e-13	2.66448e-12	XP_002883295.1	hypothetical protein ARALYDRAFT_898570	6.53243e-65	unkown funciton
Bra001866	18.4464	6.40549	-1.52595	6.34414e-50	5.68906e-49	NP_001118676.1	TIC (TIME FOR COFFEE)	0	unkown funciton
Bra001868	87.3928	182.049	1.05874	3.72368e-13	1.48413e-12	XP_002883370.1	hypothetical protein ARALYDRAFT_479767	1.33594e-56	unkown funciton
Bra001873	15.6165	111.34	2.83384	0	0	XP_002885510.1	hypothetical protein ARALYDRAFT_318984	9.04615e-109	unkown funciton
Bra001886	109.939	576.685	2.39108	8.64864e-13	3.26914e-12	NP_188923.1	ELIP1 (EARLY LIGHT-INDUCABLE PROTEIN); chlorophyll binding	4.81739e-75	others
Bra001896	33.1291	10.5187	-1.65515	3.85386e-42	3.11953e-41	AAM61702.1	pyruvate kinase, putative	0	kinase
Bra001897	43.5797	111.8	1.35919	0	0	XP_002883389.1	hypothetical protein ARALYDRAFT_479805	1.63402e-119	unkown funciton
Bra001909	43.4454	4.97621	-3.12608	2.39802e-122	3.81544e-121	NP_566725.2	dehydration-responsive protein-related	0	universal stress related
Bra001923	54.7701	5.55584	-3.30131	5.05528e-122	8.03535e-121	XP_002883465.1	hypothetical protein ARALYDRAFT_898926	0	unkown funciton
Bra001927	57.5646	134	1.21898	8.53762e-13	3.23177e-12	NP_566744.1	myb family transcription factor	3.41642e-131	transcription regulation
Bra001931	141.525	36.0138	-1.97444	2.58636e-189	5.20417e-188	BAD14936.1	glutathione reductase	0	oxidation reduction
Bra001934	73.0299	18.6314	-1.97075	7.46082e-117	1.14984e-115	XP_002885624.1	hypothetical protein ARALYDRAFT_898985	0	unkown funciton
Bra001953	2425.94	1108.11	-1.13044	0	0	BAJ34053.1	unnamed protein product	2.3674e-77	unkown funciton
Bra001958	26.0587	1219.21	5.54804	0	0	AAP37043.1	nonsymbiotic hemoglobin	1.08031e-85	secondary metabolism
Bra001970	102.945	9.41583	-3.45064	0	0	XP_002884158.1	hypothetical protein ARALYDRAFT_900277	0	unkown funciton
Bra001986	409.708	69.3812	-2.56198	0	0	XP_002865562.1	peroxidase 64	1.07999e-157	oxidation reduction
Bra001995	22.3908	84.4083	1.91448	4.10782e-14	1.85643e-13	XP_002884013.1	ubiquitin-conjugating enzyme 27	9.87648e-66	protein degradation
Bra001999	63.3807	24.5967	-1.36558	1.2984e-32	8.99e-32	XP_002886079.1	GCIP-interacting family protein	1.33117e-122	others
Bra002001	36.4288	6.38578	-2.51214	4.53452e-71	5.07895e-70	XP_002886303.1	hypothetical protein ARALYDRAFT_480914	0	unkown funciton
Bra002005	18.5178	3.13251	-2.56352	7.82598e-117	1.20553e-115	XP_002886086.1	ubiquitin-conjugating enzyme 22	0	protein degradation
Bra002011	22.5217	3.87137	-2.5404	3.24588e-75	3.76364e-74	NP_001031359.1	TRN1 (TRANSPORTIN 1); protein transporter	0	transporter facilitation
Bra002034	291.446	70.9687	-2.03798	2.21086e-299	5.34439e-298	NP_565409.1	EXL5 (EXORDIUM LIKE 5)	1.45812e-177	others
Bra002035	44.9036	178.607	1.99188	5.26246e-13	2.05159e-12	XP_002884043.1	hypothetical protein ARALYDRAFT_480607	4.06425e-22	unkown funciton
Bra002038	27.4917	111.221	2.01637	3.82138e-13	1.52117e-12	XP_002884844.1	AHG3/ATPP2CA	2.03056e-148	Energy
Bra002073	20.4118	41.8368	1.03537	6.15812e-09	1.82351e-08	XP_002886121.1	hypothetical protein ARALYDRAFT_480649	8.92976e-37	unkown funciton
Bra002079	24.7499	90.6304	1.87257	0	0	XP_002884077.1	protein-methionine-s-oxide reductase	8.06651e-67	oxidation reduction
Bra002080	32.7215	120.733	1.88351	2.2804e-13	9.43387e-13	AAL48224.1	predicted protein	3.19445e-55	unkown funciton
Bra002086	50.8518	10.8572	-2.22765	3.42276e-83	4.24792e-82	XP_002884082.1	aspartyl protease family protein	0	protein degradation
Bra002092	51.1485	8.54441	-2.58164	9.80578e-154	1.77712e-152	XP_002884085.1	hypothetical protein ARALYDRAFT_480677	0	unkown funciton
Bra002096	162.3	15.8567	-3.3555	0	0	XP_002886130.1	early-responsive to dehydration 7	0	universal stress related
Bra002116	694.62	51.7771	-3.74584	0	0	XP_002871787.1	cobalamin-independent methionine synthase	0	Nitrogen metabolism
Bra002119	30.9299	12.1148	-1.35223	4.98132e-23	2.88638e-22	NP_197300.1	TRP1 (tryptophan biosynthesis 1); anthranilate phosphoribosyltransferase	0	Nitrogen metabolism
Bra002129	10.2453	24.6141	1.26453	6.77236e-14	2.99532e-13	XP_002871798.1	predicted protein	0	unkown funciton
Bra002137	13.7724	34.8683	1.34013	1.32783e-13	5.68537e-13	NP_197315.1	DNAJ heat shock N-terminal domain-containing protein	1.35893e-108	universal stress related
Bra002144	54.9275	10.1183	-2.44056	5.73082e-164	1.07775e-162	NP_568361.1	transcription regulator NOT2/NOT3/NOT5 family protein	0	transcription regulation
Bra002146	26.8365	57.1704	1.09107	6.43392e-11	2.11983e-10	XP_002871810.1	hypothetical protein ARALYDRAFT_488698	1.39489e-58	unkown funciton
Bra002151	31.8156	121.999	1.93907	5.89972e-13	2.28442e-12	XP_002873883.1	SIP1_2	7.60966e-96	unkown funciton
Bra002152	106.253	312.499	1.55635	0	0	XP_002871813.1	hypothetical protein ARALYDRAFT_488704	1.32857e-52	unkown funciton
Bra002162	7.99132	20.2166	1.33904	1.01696e-13	4.42314e-13	XP_002873898.1	hypothetical protein ARALYDRAFT_909860	0	unkown funciton
Bra002163	31.1776	6.65183	-2.22869	5.64354e-50	5.06507e-49	XP_002871819.1	kinase family protein	0	kinase
Bra002177	10.2773	40.3678	1.97374	0	0	XP_002873908.1	pale-green and chlorophyll B reduced 2	0	oxidation reduction
Bra002178	10.0263	286.742	4.8379	2.1072e-13	8.77418e-13	NP_197368.1	BMY3; beta-amylase/ catalytic/ cation binding	0	carbohydrate metabolism
Bra002179	24.4734	386.106	3.97971	0	0	XP_002873910.1	hypothetical protein ARALYDRAFT_909882	5.29158e-171	unkown funciton
Bra002189	106.704	15.8531	-2.75077	9.54494e-211	2.0172e-209	Q8LBI9.2	EDL16_ARATH RecName: Full=Sugar transporter ERD6-like 16	0	transporter facilitation
Bra002195	51.8017	13.2847	-1.96324	2.38912e-50	2.15453e-49	XP_002871851.1	Mo25 family protein	1.06647e-169	others
Bra002209	85.6643	14.7019	-2.54269	2.16898e-212	4.60213e-211	NP_850851.1	heavy-metal-associated domain-containing protein	1.42106e-31	transporter facilitation
Bra002215	21.0773	5.15754	-2.03093	2.8892e-43	2.37235e-42	NP_197414.2	GPI transamidase component family protein / Gaa1-like family protein	0	carbohydrate metabolism
Bra002219	32.3583	10.272	-1.65541	1.66574e-33	1.17189e-32	XP_002871869.1	hypothetical protein ARALYDRAFT_909950	0	unkown funciton
Bra002227	85.7798	18.159	-2.23995	6.2713e-150	1.11691e-148	XP_002873940.1	RANGAP2	0	others
Bra002228	27.2413	6.76267	-2.01013	5.76158e-57	5.63505e-56	XP_002873941.1	armadillo/beta-catenin repeat family protein	0	signal transduction
Bra002230	35.3358	10.8398	-1.70479	5.01402e-35	3.62656e-34	XP_002871881.1	hypothetical protein ARALYDRAFT_488820	2.01843e-168	unkown funciton
Bra002232	44.7074	4.07853	-3.45439	1.22927e-181	2.43513e-180	XP_002871882.1	hypothetical protein ARALYDRAFT_488825	0	unkown funciton
Bra002233	26.4904	4.5328	-2.547	4.07284e-107	5.96049e-106	XP_002871883.1	hypothetical protein ARALYDRAFT_488829	0	unkown funciton
Bra002236	217.287	449.797	1.04968	0	0	XP_002871885.1	hypothetical protein ARALYDRAFT_488833	1.13586e-173	unkown funciton
Bra002237	37.0013	7.31127	-2.33938	2.07338e-61	2.11937e-60	XP_002873948.1	calcium-dependent protein kinase 19	0	kinase
Bra002245	182.42	1268.65	2.79796	5.00044e-13	1.95757e-12	NP_197456.1	ASP2 (ASPARTATE AMINOTRANSFERASE 2); L-aspartate:2-oxoglutarate aminotransferase	0	Nitrogen metabolism
Bra002255	82.1176	6.49366	-3.66059	0	0	XP_002871900.1	hypothetical protein ARALYDRAFT_488863	0	unkown funciton
Bra002261	42.1462	10.0947	-2.0618	1.25649e-56	1.22179e-55	NP_197478.1	TUA3; structural constituent of cytoskeleton	0	cytoskeleton
Bra002263	51.845	4.36975	-3.56858	8.41774e-298	2.02871e-296	XP_002873965.1	EMB2734	0	others
Bra002264	7.66644	15.8339	1.04639	2.6165e-08	7.47876e-08	AAO63388.1	At5g19850	9.48335e-175	unkown funciton
Bra002272	46.978	14.0433	-1.74211	7.19812e-51	6.55612e-50	BAH19409.1	AT5G19900	8.28795e-115	unkown funciton
Bra002273	26.9628	63.7945	1.24246	1.18128e-13	5.1065e-13	NP_197491.2	SOH1 family protein	2.55983e-79	others
Bra002279	101.386	40.7536	-1.31487	2.32984e-67	2.52028e-66	NP_568389.1	RPT6A (REGULATORY PARTICLE TRIPLE-A ATPASE 6A); ATPase	0	Energy
Bra002281	28.8928	6.06502	-2.25213	1.49694e-69	1.65176e-68	XP_002871928.1	hypothetical protein ARALYDRAFT_488925	0	unkown funciton
Bra002289	149.762	27.2814	-2.45668	0	0	XP_002873988.1	ATSPS1F	0	others
Bra002314	24.904	11.1553	-1.15864	5.70082e-18	2.93857e-17	XP_002874005.1	hypothetical protein ARALYDRAFT_910101	1.4025e-177	unkown funciton
Bra002318	140.734	431.422	1.61613	0	0	NP_197565.1	COPT5; copper ion transmembrane transporter/ high affinity copper ion transmembrane transporter	1.33284e-64	transporter facilitation
Bra002322	165.97	1709.38	3.36448	5.80824e-12	2.02771e-11	BAJ34051.1	unnamed protein product	3.30094e-118	unkown funciton
Bra002327	18.1549	2.24961	-3.01261	3.53528e-117	5.46693e-116	AAD02218.1	auxin response factor 7	0	secondary metabolism
Bra002332	654.181	1719.29	1.39405	0	0	XP_002874016.1	hypothetical protein ARALYDRAFT_910122	0	unkown funciton
Bra002336	89.3939	16.8564	-2.40688	7.61044e-56	7.33547e-55	NP_001146854.1	RING zinc finger protein-like	2.53228e-76	transcription regulation
Bra002337	111.081	32.9151	-1.75479	8.27626e-139	1.4186e-137	XP_002874021.1	hypothetical protein ARALYDRAFT_910130	0	unkown funciton
Bra002347	8.23804	3.30326	-1.31841	5.09666e-19	2.70531e-18	BAE93768.1	aldehyde oxidase	0	oxidation reduction
Bra002362	30.2494	4.98053	-2.60254	1.0541e-97	1.45465e-96	NP_568409.1	La domain-containing protein / proline-rich family protein	0	universal stress related
Bra002375	6.05057	285.421	5.55988	1.99618e-13	8.34237e-13	AAO73902.1	expressed protein	2.82223e-69	unkown funciton
Bra002382	91.6344	41.5717	-1.14029	7.24906e-112	1.09294e-110	NP_680187.2	tetratricopeptide repeat (TPR)-containing protein	0	others
Bra002412	19.0601	3.70209	-2.36415	2.80376e-76	3.27718e-75	NP_197637.2	unknown protein	0	unkown funciton
Bra002415	34.7781	9.02602	-1.94602	5.88822e-47	5.09424e-46	XP_002874072.1	zinc finger (ZPR1-type) family protein	0	transcription regulation
Bra002416	26.2295	9.03881	-1.53698	8.23912e-27	5.1568e-26	XP_002872004.1	hypothetical protein ARALYDRAFT_910242	0	unkown funciton
Bra002424	18.2406	2.8029	-2.70216	1.14404e-63	1.19387e-62	XP_002872014.1	EMB1211	0	unkown funciton
Bra002426	71.2628	33.0804	-1.10717	3.02276e-83	3.75441e-82	XP_002874083.1	hypothetical protein ARALYDRAFT_489123	0	unkown funciton
Bra002427	59.2893	7.42632	-2.99705	2.51306e-264	5.80677e-263	NP_197670.1	adaptin family protein	0	others
Bra002436	34.7711	114.681	1.72167	2.8888e-13	1.17364e-12	XP_002874101.1	hypothetical protein ARALYDRAFT_489144	2.31572e-45	unkown funciton
Bra002464	248.785	40.8431	-2.60673	0	0	XP_002866387.1	hypothetical protein ARALYDRAFT_496212	0	unkown funciton
Bra002479	26.8483	9.11283	-1.55886	4.42766e-42	3.57945e-41	XP_002866381.1	hypothetical protein ARALYDRAFT_496192	0	unkown funciton
Bra002481	15.0284	5.27175	-1.51133	9.04018e-26	5.53876e-25	XP_002864685.1	ATSIZ1/SIZ1	0	others
Bra002483	190.777	92.5137	-1.04415	7.17524e-94	9.64339e-93	ACS68201.1	elongation factor 1 alpha	0	translation regulation
Bra002497	52.2966	5.37714	-3.28181	8.97262e-175	1.7439e-173	NP_001078773.1	lectin protein kinase family protein	0	kinase
Bra002518	16.3088	69.6495	2.09446	1.20348e-13	5.18424e-13	XP_002866358.1	hypothetical protein ARALYDRAFT_496133	0	unkown funciton
Bra002520	46.4963	135.387	1.5419	3.56826e-13	1.42663e-12	BAF00024.1	histone H2B like protein	2.96476e-44	DNA or RNA binding
Bra002566	25.2858	124.877	2.30411	0	0	NP_001078771.1	TRP1 (TELOMERIC REPEAT BINDING PROTEIN 1); DNA binding / double-stranded telomeric DNA binding	0	transcription regulation
Bra002582	22.4495	105.17	2.22796	0	0	XP_002864623.1	hypothetical protein ARALYDRAFT_496053	9.14729e-59	unkown funciton
Bra002599	42.6366	8.27477	-2.3653	2.67672e-73	3.06365e-72	XP_002866308.1	hypothetical protein ARALYDRAFT_496029	0	unkown funciton
Bra002604	46.0998	8.50101	-2.43905	1.60143e-91	2.10967e-90	NP_851217.1	GIL1 (GRAVITROPIC IN THE LIGHT)	0	others
Bra002622	9.65216	46.9669	2.28272	1.24567e-13	5.36091e-13	NP_200681.1	pfkB-type carbohydrate kinase family protein	3.63314e-154	kinase
Bra002651	31.1536	14.6183	-1.09163	1.15406e-21	6.487e-21	XP_002866266.1	phox domain-containing protein	0	transporter facilitation
Bra002654	22.1296	83.1086	1.90902	0	0	XP_002866260.1	cbl-interacting protein kinase 10	0	kinase
Bra002658	3.80878	69.2474	4.18436	0	0	XP_002864565.1	hypothetical protein ARALYDRAFT_495950	0	unkown funciton
Bra002659	8.08865	17.45	1.10925	4.5525e-11	1.51353e-10	XP_002864564.1	predicted protein	2.04747e-163	unkown funciton
Bra002668	24.0817	3.45334	-2.80187	1.17234e-129	1.9347e-128	NP_200624.5	actin binding	0	cytoskeleton
Bra002670	22.9665	7.26389	-1.66071	1.42931e-35	1.04373e-34	XP_002866251.1	hypothetical protein ARALYDRAFT_495917	5.90791e-174	unkown funciton
Bra002672	58.0125	6.76412	-3.10039	1.03642e-243	2.31603e-242	XP_002864548.1	hypothetical protein ARALYDRAFT_918999	0	unkown funciton
Bra002674	48.1878	548.789	3.50951	0	0	XP_002866247.1	hypothetical protein ARALYDRAFT_918995	3.27326e-55	unkown funciton
Bra002675	119.014	239.894	1.01127	3.08864e-13	1.248e-12	XP_002864547.1	hypothetical protein ARALYDRAFT_495912	3.83495e-107	unkown funciton
Bra002677	35.7911	6.34438	-2.49605	4.59722e-154	8.34108e-153	XP_002864546.1	hypothetical protein ARALYDRAFT_495910	0	unkown funciton
Bra002685	20.1978	43.7762	1.11595	2.21512e-12	8.01716e-12	XP_002866238.1	hypothetical protein ARALYDRAFT_332081	9.65381e-52	unkown funciton
Bra002686	14.6021	32.2868	1.14477	1.21458e-13	5.22925e-13	XP_002866236.1	hypothetical protein ARALYDRAFT_495890	1.68712e-149	unkown funciton
Bra002703	10.5134	4.5563	-1.20629	1.6839e-15	8.09333e-15	NP_200579.1	heat shock protein-related	0	universal stress related
Bra002710	227.189	48.7216	-2.22126	0	0	BAJ34093.1	unnamed protein product	0	unkown funciton
Bra002719	206.416	21.734	-3.24753	2.10528e-279	4.97616e-278	BAJ34580.1	unnamed protein product	1.03285e-153	unkown funciton
Bra002762	74.9917	7.41831	-3.33757	0	0	BAJ34212.1	unnamed protein product	0	unkown funciton
Bra002766	60.5894	141.988	1.22863	2.64234e-12	9.4988e-12	XP_002864495.1	hypothetical protein ARALYDRAFT_495797	0	unkown funciton
Bra002778	59.6193	18.5207	-1.68664	1.23798e-56	1.20453e-55	NP_568844.1	NAP1;3 (NUCLEOSOME ASSEMBLY PROTEIN 1;3); DNA binding	1.13854e-139	transcription regulation
Bra002786	20.6066	7.26881	-1.50332	3.00828e-43	2.46886e-42	XP_002866171.1	hypothetical protein ARALYDRAFT_495779	0	unkown funciton
Bra002799	72.6394	29.3361	-1.30807	1.03763e-65	1.10559e-64	XP_002864474.1	EMB2755	0	unkown funciton
Bra002801	16.5756	43.7762	1.40108	5.77316e-15	2.72512e-14	XP_002864472.1	phosphofructokinase family protein	0	kinase
Bra002821	35.1198	5.38679	-2.70479	5.25252e-91	6.89958e-90	XP_002866138.1	calmodulin-binding protein	0	small molecular
Bra002822	90.1397	747.88	3.05257	5.7403e-12	2.00509e-11	BAB11262.1	pyruvate kinase	0	carbohydrate metabolism
Bra002823	13.2596	63.7421	2.26521	4.996e-14	2.23849e-13	XP_002864451.1	zinc finger family protein	1.97769e-102	transcription regulation
Bra002843	66.8057	28.8599	-1.21091	3.625e-26	2.24162e-25	NP_200425.1	KH domain-containing protein	1.87644e-125	others
Bra002854	55.3769	14.1876	-1.96466	2.77472e-72	3.14203e-71	NP_567747.4	ATP binding / kinase/ phosphotransferase, alcohol group as acceptor / uracil phosphoribosyltransferase	0	kinase
Bra002880	22.2457	6.62204	-1.74818	1.62634e-46	1.39908e-45	XP_002864406.1	hypothetical protein ARALYDRAFT_495653	3.44562e-113	unkown funciton
Bra002904	42.9423	14.5344	-1.56293	1.50675e-66	1.61622e-65	NP_200359.1	SVL1 (SHV3-LIKE 1); glycerophosphodiester phosphodiesterase/ phosphoric diester hydrolase	0	carbohydrate metabolism
Bra002914	37.1303	348.935	3.23229	0	0	XP_002864393.1	protease inhibitor/seed storage/lipid transfer protein (LTP) family protein	7.7799e-25	protein degradation
Bra002922	51.3338	21.5146	-1.25459	7.08756e-45	5.94659e-44	XP_002864385.1	atmap65-1	0	cytoskeleton
Bra002926	244.908	512.103	1.0642	9.35164e-12	3.21483e-11	ACJ86144.1	unknown	7.72887e-118	unkown funciton
Bra002934	63.009	21.2788	-1.56614	2.03384e-60	2.06049e-59	XP_002864373.1	2-oxoglutarate dehydrogenase E2 subunit	0	carbohydrate metabolism
Bra002942	481.197	5402.04	3.4888	2.12322e-11	7.18229e-11	XP_002866069.1	pyruvate decarboxylase-2	0	carbohydrate metabolism
Bra002944	36.6248	202.723	2.46862	5.08926e-13	1.9882e-12	BAJ34327.1	unnamed protein product	1.73065e-54	unkown funciton
Bra002945	14.5395	39.6464	1.44722	1.41442e-13	6.0335e-13	XP_002866066.1	AT hook motif-containing protein	1.31233e-91	transcription regulation
Bra002950	73.0014	220.668	1.59588	4.452e-13	1.75904e-12	XP_002864359.1	pollen ole e 1 allergen and extensin family protein	3.83664e-67	universal stress related
Bra002951	20.2702	44.2737	1.12709	1.31826e-11	4.5032e-11	XP_002866064.1	hypothetical protein ARALYDRAFT_918623	4.95518e-59	unkown funciton
Bra002954	43.1781	88.7736	1.03983	1.52101e-13	6.47345e-13	XP_002866062.1	tryptophan synthase beta-subunit	0	Nitrogen metabolism
Bra002963	36.3677	7.84052	-2.21364	3.35994e-63	3.49602e-62	XP_002866055.1	GAUT12/IRX8/LGT6	0	unkown funciton
Bra002969	26.1025	4.58703	-2.50855	2.4025e-85	3.02759e-84	XP_002866054.1	hypothetical protein ARALYDRAFT_495546	0	unkown funciton
Bra002973	14.5556	36.9909	1.34559	0	0	XP_002864348.1	50S ribosomal protein L24, chloroplast	6.15107e-89	translation regulation
Bra002995	58.9435	22.6715	-1.37845	4.68826e-48	4.1084e-47	XP_002866038.1	ARF-GAP domain 5	0	small molecular
Bra003024	44.7208	92.3781	1.0466	0	0	NP_200205.1	yippee family protein	2.13055e-67	others
Bra003027	17.5112	121.98	2.80029	5.86198e-14	2.61148e-13	NP_200198.1	plastocyanin-like domain-containing protein	3.5933e-72	oxidation reduction
Bra003046	118.03	37.6026	-1.65025	4.42674e-140	7.62044e-139	XP_002865979.1	hypothetical protein ARALYDRAFT_495433	0	unkown funciton
Bra003054	76.4253	19.8983	-1.94141	2.5966e-179	5.11204e-178	XP_002864245.1	hypothetical protein ARALYDRAFT_495420	0	unkown funciton
Bra003062	294.085	132.861	-1.14631	4.92486e-169	9.44538e-168	XP_002865971.1	pectinesterase family protein	0	cell wall
Bra003132	41.0469	145.101	1.82171	4.13002e-14	1.86382e-13				no homology
Bra003158	138.92	334.387	1.26727	4.33876e-13	1.71706e-12	XP_002877945.1	40S ribosomal protein S21	2.5583e-36	translation regulation
Bra003160	29.4001	8.87831	-1.72746	3.51514e-35	2.54995e-34	XP_002876232.1	hypothetical protein ARALYDRAFT_485786	0	unkown funciton
Bra003176	17.4793	51.945	1.57134	4.13002e-14	1.86224e-13	NP_190989.1	ribosomal protein L17 family protein	1.30521e-92	translation regulation
Bra003186	51.8586	20.9567	-1.30717	6.09496e-39	4.67974e-38	XP_002877980.1	ump synthase	0	secondary metabolism
Bra003191	9.41386	196.42	4.38301	6.0174e-14	2.67066e-13	XP_002876264.1	hypothetical protein ARALYDRAFT_485873	2.67458e-43	unkown funciton
Bra003192	17.9608	65.1611	1.85916	3.07088e-13	1.24303e-12	NP_191029.1	sugar isomerase (SIS) domain-containing protein / CBS domain-containing protein	1.77358e-172	carbohydrate metabolism
Bra003194	76.4411	24.6764	-1.63122	1.94105e-52	1.80133e-51	NP_191041.1	zinc finger (GATA type) family protein	1.2247e-113	transcription regulation
Bra003196	80.5496	409.391	2.34553	0	0	NP_191042.1	PIP2;5 (PLASMA MEMBRANE INTRINSIC PROTEIN 2;5); water channel	1.46758e-155	transporter facilitation
Bra003199	35.9108	156.584	2.12445	3.18634e-13	1.28488e-12	XP_002878005.1	hypothetical protein ARALYDRAFT_906905	1.00239e-65	unkown funciton
Bra003211	39.2606	4.08922	-3.26318	1.09948e-191	2.21933e-190	XP_002876300.1	hypothetical protein ARALYDRAFT_485968	0	unkown funciton
Bra003225	22.6417	9.87021	-1.19783	4.43508e-16	2.1652e-15	NP_191158.1	ESK1 (ESKIMO 1)	0	others
Bra003226	101.115	49.1366	-1.04112	3.6462e-28	2.33522e-27	NP_001146869.1	ferritin-1	5.2871e-113	oxidation reduction
Bra003228	23.6939	59.2631	1.32262	0	0	XP_002878068.1	prenylated rab acceptor family protein	9.07932e-73	transporter facilitation
Bra003234	76.0335	215.803	1.50501	3.35288e-13	1.34422e-12	XP_002878075.1	hypothetical protein ARALYDRAFT_486064	1.75272e-37	unkown funciton
Bra003239	28.3394	89.248	1.65501	5.74652e-13	2.2305e-12	ACQ76810.1	WRKY transcription factor 70	2.84551e-111	transcription regulation
Bra003241	47.3234	23.1041	-1.03441	4.2453e-25	2.56655e-24	NP_191205.1	oxidoreductase, zinc-binding dehydrogenase family protein	4.70435e-161	oxidation reduction
Bra003256	9.0494	20.8204	1.2021	0	0	XP_002876389.1	hypothetical protein ARALYDRAFT_486137	0	unkown funciton
Bra003257	45.4975	91.582	1.00928	3.08864e-13	1.24816e-12	XP_002878121.1	SIP2_1	6.59422e-105	others
Bra003267	17.4027	88.8337	2.3518	3.22852e-13	1.3009e-12	XP_002876398.1	hypothetical protein ARALYDRAFT_486155	1.35372e-161	unkown funciton
Bra003270	139.265	21.4887	-2.69618	7.4543e-303	1.80743e-301	XP_002878134.1	hypothetical protein ARALYDRAFT_486159	0	unkown funciton
Bra003273	132.965	15.9654	-3.05802	2.84222e-204	5.89355e-203	ABC94638.2	basic glucanase	1.26876e-167	carbohydrate metabolism
Bra003287	31.135	9.17757	-1.76235	3.69324e-41	2.94252e-40	ABF47341.1	calcium-dependent protein kinase	0	kinase
Bra003292	55.256	23.9594	-1.20554	7.87756e-31	5.28364e-30	Q9XFW4.1	LPAT2_BRANA RecName: Full=1-acyl-sn-glycerol-3-phosphate acyltransferase 2	0	lipid metabolism
Bra003301	66.6534	180.271	1.43542	4.452e-13	1.75948e-12	ADP37981.1	ubiquitin-protein ligase	4.69692e-81	protein degradation
Bra003302	68.5339	31.2364	-1.13359	9.13292e-67	9.82289e-66	XP_002878177.1	C2 domain-containing protein	0	others
Bra003319	26.5696	9.18069	-1.5331	6.71344e-42	5.40545e-41	XP_002876456.1	hypothetical protein ARALYDRAFT_486261	0	unkown funciton
Bra003340	64.3989	29.0438	-1.1488	8.3441e-27	5.22148e-26	NP_567066.1	PP2A-3 (PROTEIN PHOSPHATASE 2A-3); protein serine/threonine phosphatase	0	signal transduction
Bra003343	56.2831	18.5573	-1.60072	2.62742e-76	3.07331e-75	XP_002876468.1	hypothetical protein ARALYDRAFT_486308	0	unkown funciton
Bra003345	106.761	30.124	-1.82539	5.3116e-157	9.72565e-156	NP_191420.1	ketol-acid reductoisomerase	0	Nitrogen metabolism
Bra003352	177.779	408.021	1.19856	3.26628e-12	1.16656e-11	XP_002878236.1	predicted protein	4.21981e-135	unkown funciton
Bra003357	33.3506	15.9037	-1.06835	1.70753e-21	9.56776e-21	XP_002878240.1	GAUT15	0	others
Bra003381	80.2217	162.09	1.01473	2.68674e-13	1.09713e-12	NP_181874.1	60S ribosomal protein L38 (RPL38A)	1.82496e-20	translation regulation
Bra003395	201.13	90.7987	-1.14738	2.2431e-113	3.40603e-112	NP_191551.1	ATGDI2 (RAB GDP DISSOCIATION INHIBITOR 2); RAB GDP-dissociation inhibitor	0	small molecular
Bra003397	139.333	15.8716	-3.13401	0	0	XP_002876531.1	MTHFR1	0	others
Bra003398	74.1141	28.6191	-1.37277	3.06812e-55	2.93776e-54	NP_567089.1	MAP2B (METHIONINE AMINOPEPTIDASE 2B); aminopeptidase/ metalloexopeptidase	0	protein degradation
Bra003402	12.0843	4.18729	-1.52905	1.65355e-36	1.222e-35	XP_002878319.1	ATMRP9	0	transporter facilitation
Bra003435	63.6113	19.1057	-1.73528	3.0228e-36	2.22361e-35	NP_191666.2	PEX11E	4.59789e-111	others
Bra003450	16.0745	247.059	3.94201	0	0	NP_191705.1	BRH1 (BRASSINOSTEROID-RESPONSIVE RING-H2); protein binding / zinc ion binding	3.18851e-87	transporter facilitation
Bra003457	71.0974	6.51779	-3.44734	2.21618e-161	4.14098e-160	XP_002876622.1	delta-8 sphingolipid desaturase	0	lipid metabolism
Bra003464	15.1655	2.614	-2.53646	7.91914e-76	9.21917e-75	CAB71099.1	putative protein	0	unkown funciton
Bra003473	41.6923	119.115	1.51451	1.93623e-13	8.11199e-13	XP_002878413.1	hypothetical protein ARALYDRAFT_486680	1.72497e-171	unkown funciton
Bra003481	29.7101	13.994	-1.08614	2.1687e-22	1.23998e-21	XP_002878423.1	kinase family protein	0	kinase
Bra003493	25.4244	12.0032	-1.0828	5.32908e-25	3.21325e-24	XP_002878444.1	zinc finger family protein	0	transcription regulation
Bra003504	8.46538	43.0342	2.34584	0	0	NP_191825.2	GATL7 (Galacturonosyltransferase-like 7); polygalacturonate 4-alpha-galacturonosyltransferase/ transferase	3.20634e-177	cell wall
Bra003509	9.37659	51.3347	2.4528	7.41628e-14	3.26114e-13	NP_567132.4	AtATG18a	6.00179e-173	transporter facilitation
Bra003511	37.747	18.7612	-1.00861	2.91426e-18	1.51393e-17	NP_191842.1	AUD1; UDP-glucuronate decarboxylase/ catalytic/ dTDP-glucose 4,6-dehydratase	0	carbohydrate metabolism
Bra003525	80.6196	20.6029	-1.96828	1.37415e-244	3.07719e-243	XP_002878518.1	EMB2221	0	others
Bra003534	67.582	4.04992	-4.06067	0	0	NP_178101.3	GC5 (golgin candidate 5); protein binding	0	unkown funciton
Bra003539	104.731	15.3567	-2.76975	9.13922e-294	2.19596e-292	XP_002889318.1	heat shock protein binding protein	0	universal stress related
Bra003542	36.3218	7.009	-2.37356	9.48788e-138	1.62367e-136	NP_178116.5	protein binding / structural molecule	0	unkown funciton
Bra003547	43.3282	147.66	1.7689	4.63186e-13	1.82311e-12	XP_002887848.1	hypothetical protein ARALYDRAFT_895993	5.10524e-90	unkown funciton
Bra003559	28.7005	4.2978	-2.73941	7.74558e-84	9.66926e-83	Q9C977.1	PP135_ARATH RecName: Full=Pentatricopeptide repeat-containing protein At1g80270, mitochondrial; Flags: Precursor	0	others
Bra003560	58.2835	23.5554	-1.30703	1.18446e-56	1.1528e-55	BAJ33695.1	unnamed protein product	0	unkown funciton
Bra003565	26.4426	2.00089	-3.72415	3.63096e-229	7.96342e-228	XP_002887831.1	EMB2753	0	others
Bra003567	7.47617	16.1545	1.11157	3.32134e-12	1.18556e-11	ABK32113.1	At1g80460	0	unkown funciton
Bra003569	53.6246	2.12857	-4.65494	0	0	XP_002887825.1	hypothetical protein ARALYDRAFT_895943	0	unkown funciton
Bra003573	75.4973	27.0773	-1.47934	1.58393e-79	1.91444e-78	XP_002887824.1	hypothetical protein ARALYDRAFT_895939	0	unkown funciton
Bra003583	83.4673	30.5607	-1.44953	3.8174e-41	3.03993e-40	XP_002889274.1	predicted protein	1.43756e-122	unkown funciton
Bra003588	100.849	23.504	-2.10122	1.19348e-90	1.56514e-89	ACI14400.1	WRKY40-1 transcription factor	8.81723e-143	transcription regulation
Bra003590	64.0574	153.217	1.25814	0	0	AAF18498.1	unknown	5.7855e-26	others
Bra003592	22.9374	588.696	4.68175	0	0	NP_178207.1	J8; heat shock protein binding / unfolded protein binding	6.19849e-68	universal stress related
Bra003595	8.51206	39.0585	2.19806	0	0	AAM61059.1	unknown	0	unkown funciton
Bra003596	97.7276	42.4306	-1.20366	6.8069e-66	7.25516e-65	XP_002889266.1	aspartyl protease family protein	0	protein degradation
Bra003597	32.6015	3.22987	-3.33539	9.94282e-122	1.5757e-120	NP_565218.1	atnudt3 (Arabidopsis thaliana Nudix hydrolase homolog 3); hydrolase	0	carbohydrate metabolism
Bra003613	48.6957	5.89976	-3.04507	2.68094e-82	3.30926e-81	AAP84709.1	metacaspase 4	5.50058e-143	protein degradation
Bra003615	7.38693	15.8796	1.10413	1.17333e-11	4.01628e-11	XP_002887776.1	evolutionarily conserved C-terminal region 8	0	others
Bra003622	53.2852	16.4581	-1.69494	1.30852e-94	1.76681e-93	BAH56808.1	AT1G79090	0	unkown funciton
Bra003633	76.7024	23.3613	-1.71515	3.64648e-110	5.45145e-109	XP_002887760.1	VHA-A	0	transporter facilitation
Bra003634	21.0394	44.6181	1.08453	5.7406e-10	1.8041e-09	Q8GWH5.1	Reticulon-like protein B22; Short=AtRTNLB22	4.49162e-70	others
Bra003635	4.79998	670.97	7.12708	3.66374e-14	1.66492e-13	XP_002889216.1	hypothetical protein ARALYDRAFT_895785	0	unkown funciton
Bra003644	190.442	446.517	1.22936	2.60902e-12	9.39594e-12	NP_565178.1	ATGSTU19 (GLUTATHIONE S-TRANSFERASE TAU 19); glutathione binding/glutathione transferase	2.89442e-101	Nitrogen metabolism
Bra003672	122.002	274.684	1.17086	0	0	Q9CA23.1	Ubiquitin-fold modifier 1; Flags: Precursor	4.40337e-44	protein degradation
Bra003675	26.2092	11.1608	-1.23163	2.3163e-16	1.1397e-15	AAM67247.1	putative aminotransferase	0	others
Bra003678	53.1329	7.82169	-2.76405	4.08426e-151	7.31889e-150	CAC19877.1	long chain acyl-CoA synthetase	0	lipid metabolism
Bra003699	644.468	1336.62	1.05241	1.19695e-11	4.09583e-11				no homology
Bra003700	27.9217	130.498	2.22457	0	0	XP_002887662.1	F-box family protein	0	protein degradation
Bra003701	17.0369	42.4361	1.31663	1.90958e-13	8.00456e-13	AAC49771.1	AP2 domain containing protein RAP2.5	1.96493e-60	transcription regulation
Bra003703	45.6926	12.9047	-1.82406	7.58186e-71	8.47729e-70	XP_002887660.1	hypothetical protein ARALYDRAFT_895569	2.94827e-169	unkown funciton
Bra003706	31.6501	5.17392	-2.61288	1.52146e-132	2.54237e-131	NP_177811.2	SEC5A (EXOCYST COMPLEX COMPONENT SEC5)	0	others
Bra003738	61.1196	639.642	3.38756	5.554e-12	1.94192e-11	XP_002887860.1	NADP-malic enzyme 4	0	carbohydrate metabolism
Bra003751	302.735	108.366	-1.48214	2.6994e-217	5.78135e-216	NP_565111.1	nodulin MtN21 family protein	0	unkown funciton
Bra003755	528.949	83.418	-2.6647	0	0	NP_177672.2	AtbZIP44 (Arabidopsis thaliana basic leucine-zipper 44); DNA binding/protein heterodimerization/transcription factor	3.03139e-59	transcription regulation
Bra003779	8.95888	159.989	4.15851	0	0	XP_002887567.1	hypothetical protein ARALYDRAFT_895362	5.27015e-90	unkown funciton
Bra003804	44.6801	11.2786	-1.98605	4.35896e-58	4.31344e-57	XP_002887538.1	galactosyl transferase GMA12/MNN10 family protein	0	carbohydrate metabolism
Bra003822	26.0126	3.31448	-2.97235	4.62072e-81	5.65339e-80	NP_565075.1	lipase family protein	0	lipid metabolism
Bra003827	22.0673	47.3866	1.10257	4.07452e-13	1.61851e-12	XP_002888948.1	hypothetical protein ARALYDRAFT_895246	6.72188e-106	unkown funciton
Bra003842	59.8518	121.978	1.02716	0	0	NP_177492.1	MKK9 (MAP KINASE KINASE 9); MAP kinase kinase/ kinase/ protein kinase activator	8.18531e-147	kinase
Bra003854	39.2014	10.0498	-1.96374	2.03236e-56	1.97083e-55	BAJ33996.1	unnamed protein product	0	unkown funciton
Bra003867	10.8797	3.8839	-1.48606	2.02022e-28	1.30116e-27	NP_177427.2	ATP binding / protein binding / transmembrane receptor	0	Energy
Bra003881	32.6176	477.124	3.87064	1.03917e-13	4.51541e-13	BAJ34157.1	unnamed protein product	2.69273e-46	unkown funciton
Bra003883	13.9193	75.3525	2.43657	0	0	NP_001077812.1	ethylene-responsive element-binding protein, putative	2.73809e-53	secondary metabolism
Bra003917	16.4126	52.4646	1.67654	8.4155e-14	3.6848e-13	XP_002867842.1	hypothetical protein ARALYDRAFT_914524	1.2971e-97	unkown funciton
Bra003934	13.8887	35.5243	1.3549	4.04122e-14	1.82788e-13	XP_002888823.1	beta-ketoacyl-CoA synthase family protein	0	lipid metabolism
Bra003949	58.853	24.8924	-1.24141	4.30824e-27	2.70817e-26	AAF87017.1	unnamed protein product	7.15513e-95	unkown funciton
Bra003969	39.1987	79.5601	1.02124	0	0	NP_177158.1	DNA-binding family protein	4.67453e-82	transcription regulation
Bra003975	101.189	22.0412	-2.19878	2.8113e-92	3.72503e-91	XP_002863106.1	hypothetical protein ARALYDRAFT_920363	2.87354e-119	unkown funciton
Bra003988	7.0016	15.3808	1.13538	3.27618e-11	1.09766e-10	XP_002890785.1	hypothetical protein ARALYDRAFT_473098	3.49103e-167	unkown funciton
Bra003994	9.73472	176.01	4.17637	0	0	BAJ34568.1	unnamed protein product	5.44254e-165	unkown funciton
Bra004003	60.9905	241.069	1.98279	8.4488e-13	3.20118e-12	AAM62861.1	unknown	1.14559e-41	unkown funciton
Bra004053	29.5087	8.76939	-1.75059	2.88012e-44	2.39632e-43	NP_176973.1	ATMAP70-1 (microtubule-associated proteins 70-1); microtubule binding	0	cytoskeleton
Bra004090	51.2013	264.348	2.36819	5.81978e-13	2.25565e-12	BAJ34244.1	unnamed protein product	5.89322e-87	unkown funciton
Bra004105	107.26	31.0954	-1.78634	1.01979e-103	1.45575e-102	XP_002866410.1	evolutionary conserved C-terminal 3	3.24237e-96	others
Bra004114	36.5389	4.72069	-2.95236	4.47924e-254	1.01877e-252	NP_001077775.1	GTB1; RNA binding / hydrolase, acting on ester bonds / transcription elongation regulator	0	DNA or RNA binding
Bra004118	31.052	3.5021	-3.14839	6.06434e-109	9.0071e-108	XP_002888422.1	calcium-binding EF hand family protein	0	small molecular
Bra004120	23.7583	3.82359	-2.63543	2.08826e-104	2.99302e-103	XP_002888426.1	hypothetical protein ARALYDRAFT_475657	0	unkown funciton
Bra004126	277.649	676.39	1.28459	5.48384e-12	1.91802e-11	XP_002888446.1	hypothetical protein ARALYDRAFT_475676	7.93749e-50	unkown funciton
Bra004133	54.7976	16.1096	-1.76619	3.51492e-50	3.1671e-49	AAK83599.1	At1g65900/F12P19_7	0	unkown funciton
Bra004134	206.763	83.9486	-1.3004	4.6201e-131	7.65613e-130	AAF06054.1	AC009513_10 Strong similarity to gb/H36712	0	carbohydrate metabolism
Bra004136	181.154	90.1167	-1.00735	1.37378e-45	1.16642e-44	AAS79669.1	glutamate decarboxylase 2	7.41009e-48	Nitrogen metabolism
Bra004155	10.7661	41.4394	1.9445	0	0	XP_002887017.1	hypothetical protein ARALYDRAFT_894261	5.26824e-110	unkown funciton
Bra004160	39.306	12.3548	-1.66968	5.69604e-65	6.0229e-64	O49230.1	ETR1_BRAOL RecName: Full=Ethylene receptor 1	0	unkown funciton
Bra004170	17.4555	34.9819	1.00292	7.18838e-10	2.24649e-09	XP_002888502.1	hypothetical protein ARALYDRAFT_475748	1.39997e-90	unkown funciton
Bra004177	44.7194	20.6334	-1.11592	2.13162e-18	1.11169e-17	CAC80640.1	ClpP putative protein	2.77793e-166	unkown funciton
Bra004200	99.5942	34.8842	-1.51349	5.23492e-38	3.96224e-37	NP_176873.1	ZFP6 (ZINC FINGER PROTEIN 6); nucleic acid binding /transcription factor/ zinc ion binding	9.59322e-57	transcription regulation
Bra004206	9.23252	1.07402	-3.10371	5.03758e-94	6.77612e-93	NP_176885.7	SWEETIE (SWEETIE); binding	0	others
Bra004208	9.71734	42.4212	2.12615	0	0	XP_002887109.1	F-box family protein	0	protein degradation
Bra004210	11.4375	5.5745	-1.03686	1.46387e-14	6.79838e-14	NP_176892.1	LINC1 (LITTLE NUCLEI1)	0	others
Bra004221	146.735	310.716	1.08238	3.61932e-13	1.44452e-12	AAG00242.1	unknown protein	1.78192e-45	unkown funciton
Bra004239	14.7247	37.549	1.35054	1.06359e-13	4.61652e-13	XP_002887133.1	hypothetical protein ARALYDRAFT_894509	9.20219e-64	unkown funciton
Bra004269	46.4387	21.6231	-1.10275	1.10172e-46	9.50074e-46	XP_002888635.1	hypothetical protein ARALYDRAFT_475901	0	unkown funciton
Bra004279	45.5917	13.7063	-1.73393	2.25102e-67	2.43585e-66	XP_002887159.1	atmap70-1	0	cytoskeleton
Bra004284	18.8245	62.5374	1.73211	2.43138e-13	9.98216e-13	XP_002887155.1	hypothetical protein ARALYDRAFT_475905	8.77503e-110	unkown funciton
Bra004295	101.971	235.82	1.20952	0	0	XP_002888652.1	universal stress protein family protein	1.90281e-66	universal stress related
Bra004310	47.1803	5.53061	-3.09267	1.77166e-101	2.49666e-100	NP_177014.1	exostosin family protein	0	others
Bra004313	22.0071	55.3795	1.33139	4.13002e-14	1.86303e-13	XP_002887183.1	hypothetical protein ARALYDRAFT_894615	8.8703e-65	unkown funciton
Bra004330	9.67203	79.6484	3.04175	8.12684e-14	3.56476e-13	XP_002887197.1	hypothetical protein ARALYDRAFT_475994	1.50214e-89	unkown funciton
Bra004333	43.6638	88.742	1.02318	5.89972e-13	2.28248e-12	NP_177040.2	zinc finger (DNL type) family protein	1.28512e-51	transcription regulation
Bra004373	14.9109	36.6291	1.29662	4.15224e-14	1.87173e-13	XP_002888715.1	hypothetical protein ARALYDRAFT_476060	2.40095e-73	unkown funciton
Bra004375	12.4074	5.24266	-1.24283	3.03288e-16	1.48724e-15	XP_002888716.1	predicted protein	0	unkown funciton
Bra004378	20.5697	45.7481	1.15319	0	0	AAZ23773.1	plastid division regulator MinE	1.15493e-113	others
Bra004379	44.5159	269.816	2.59958	0	0	NP_177100.1	translation initiation factor	2.24098e-129	translation regulation
Bra004381	21.485	7.64249	-1.49122	2.91694e-30	1.94015e-29	XP_002888719.1	hypothetical protein ARALYDRAFT_339179	0	unkown funciton
Bra004387	81.4402	166.182	1.02895	0	0	XP_002887240.1	predicted protein	7.38152e-44	unkown funciton
Bra004389	18.354	162.436	3.14571	0	0	NP_564969.1	UbiE/COQ5 methyltransferase family protein	1.25056e-102	protein degradation
Bra004392	16.1614	2370.24	7.19634	0	0	ACZ57921.1	expansin protein 1	5.09261e-119	cell wall
Bra004396	14.4636	32.0314	1.14706	2.72448e-13	1.11112e-12	BAJ34568.1	unnamed protein product	1.64282e-139	unkown funciton
Bra004404	26.4707	53.6342	1.01876	1.06359e-13	4.61715e-13	NP_177122.2	SBH1 (SPHINGOID BASE HYDROXYLASE 1); catalytic/ sphingosine hydroxylase	2.83706e-123	lipid metabolism
Bra004413	16.4891	3.36997	-2.2907	8.13434e-73	9.267e-72	XP_002880343.1	structural constituent of ribosome	0	translation regulation
Bra004420	77.2502	11.059	-2.80432	0	0	XP_002880338.1	sister-chromatide cohesion protein 3	0	others
Bra004423	100.36	48.7419	-1.04195	1.07893e-37	8.12196e-37	NP_182310.1	zinc finger (B-box type) family protein	1.39951e-94	transcription regulation
Bra004427	32.8685	8.46661	-1.95685	4.20454e-42	3.4008e-41	XP_002880326.1	zinc finger (CCCH-type) family protein	2.02225e-177	transcription regulation
Bra004435	11.3812	953.945	6.38919	3.21964e-14	1.46729e-13	BAJ33672.1	unnamed protein product	5.40501e-80	unkown funciton
Bra004436	20.9547	44.5826	1.08921	0	0	XP_002882128.1	zinc finger family protein	6.28771e-150	transcription regulation
Bra004437	42.1678	111.61	1.40425	4.996e-14	2.23724e-13	XP_002880319.1	hypothetical protein ARALYDRAFT_904244	3.38539e-44	unkown funciton
Bra004439	17.2346	38.7007	1.16706	1.7133e-12	6.2598e-12	XP_002882126.1	hypothetical protein ARALYDRAFT_904242	2.5099e-64	unkown funciton
Bra004450	81.9092	13.6276	-2.5875	8.72184e-147	1.53621e-145	BAH19491.1	AT2G47510	0	unkown funciton
Bra004451	61.9744	2.5641	-4.59515	0	0	XP_002880308.1	predicted protein	0	unkown funciton
Bra004459	22.9661	68.0583	1.56726	0	0	XP_002880299.1	cp12 domain-containing protein 1	3.75574e-56	others
Bra004460	115.849	11.2792	-3.36052	0	0	XP_002882118.1	serine-type peptidase	0	protein degradation
Bra004462	12.2183	24.4632	1.00157	1.78731e-09	5.46217e-09	XP_002880297.1	hypothetical protein ARALYDRAFT_904211	1.63809e-115	unkown funciton
Bra004466	19.6215	185.775	3.24305	3.13972e-13	1.26736e-12	NP_182248.1	WRKY23; transcription factor	7.18711e-101	transcription regulation
Bra004486	22.2022	5.79893	-1.93685	2.73544e-47	2.37689e-46	NP_850466.2	unknown protein	0	unkown funciton
Bra004491	20.2686	69.7395	1.78273	0	0	XP_002882095.1	predicted protein	0	unkown funciton
Bra004503	64.1515	5.22465	-3.61808	5.98614e-186	1.19697e-184	CAZ68125.1	putative CCA1 protein	0	transcription regulation
Bra004527	38.5662	829.054	4.42606	1.00231e-12	3.76285e-12	XP_002882075.1	hypothetical protein ARALYDRAFT_483815	6.59325e-118	unkown funciton
Bra004528	157.957	354.738	1.16723	0	0	AAK91350.1	F11C10.23	3.24134e-23	unkown funciton
Bra004529	22.3287	47.3813	1.08542	2.55148e-11	8.5855e-11	NP_850457.1	unknown protein	1.60942e-24	unkown funciton
Bra004531	47.1563	9.09752	-2.3739	8.63518e-159	1.59299e-157	XP_002880249.1	hypothetical protein ARALYDRAFT_904119	0	unkown funciton
Bra004532	66.2232	10.8766	-2.6061	1.82865e-124	2.93733e-123	XP_002882073.1	basic helix-loop-helix family protein	6.75761e-110	transcription regulation
Bra004534	156.428	56.1405	-1.47838	2.61568e-39	2.01511e-38	NP_182172.1	unknown protein	6.81186e-37	unkown funciton
Bra004543	40.1534	14.1141	-1.50839	1.01303e-45	8.61951e-45	NP_566071.1	JAR1 (JASMONATE RESISTANT 1); ATP binding / adenylyltransferase/ catalytic/ jasmonate-amino synthetase	0	secondary metabolism
Bra004551	16.047	35.2594	1.1357	0	0	NP_566069.1	BTB/POZ domain-containing protein	0	transcription regulation
Bra004558	43.1368	6.37882	-2.75756	1.0906e-62	1.13036e-61				no homology
Bra004567	41.8444	19.7221	-1.08522	5.34926e-20	2.91101e-19	ACU17842.1	unknown	2.55215e-90	unkown funciton
Bra004576	38.9084	123.377	1.66492	5.56e-13	2.16126e-12	XP_002879876.1	hypothetical protein ARALYDRAFT_903345	0	unkown funciton
Bra004592	50.578	124.679	1.30164	0	0	NP_181622.2	nodulin MtN21 family protein	4.59409e-135	unkown funciton
Bra004600	28.0466	6.21047	-2.17506	9.5368e-52	8.78139e-51	NP_181647.1	CRK1 (CDPK-RELATED KINASE 1); calcium ion binding / calcium-dependent protein serine/threonine phosphatase/ calmodulin-dependent protein kinase/ kinase	0	kinase
Bra004620	45.2112	645.597	3.83588	2.00284e-13	8.35926e-13	AAM61257.1	calmodulin-like protein	5.4463e-65	signal transduction
Bra004646	22.7386	4.13492	-2.45921	9.54056e-81	1.16371e-79	NP_565958.1	VLN2 (VILLIN 2); actin binding	0	cytoskeleton
Bra004649	67.7211	10.0086	-2.75837	1.68136e-267	3.90764e-266	XP_002881797.1	peptidase M16 family protein	0	protein degradation
Bra004652	19.2191	2.55484	-2.91124	8.14448e-75	9.41287e-74	XP_002879954.1	hypothetical protein ARALYDRAFT_483263	0	unkown funciton
Bra004657	16.2185	125.836	2.95583	1.01696e-13	4.42194e-13	XP_002881806.1	remorin family protein	1.18426e-87	signal transduction
Bra004662	14.724	1.93358	-2.92883	2.74124e-73	3.13524e-72	XP_002881811.1	hypothetical protein ARALYDRAFT_321881	0	unkown funciton
Bra004663	12.446	4.0879	-1.60625	4.76656e-30	3.15724e-29	XP_002881811.1	hypothetical protein ARALYDRAFT_321881	0	unkown funciton
Bra004664	68.2732	193.13	1.50018	8.12684e-14	3.56133e-13				no homology
Bra004680	51.3227	124.033	1.27305	4.3543e-13	1.72236e-12	NP_181760.1	unknown protein	4.21844e-55	unkown funciton
Bra004708	48.7049	22.4829	-1.11524	4.78408e-23	2.77461e-22	AAD22996.1	expressed protein	0	unkown funciton
Bra004718	25.0685	11.102	-1.17506	2.28616e-17	1.15806e-16	NP_565985.1	PP5.2 (PROTEIN PHOSPHATASE 5.2); phosphoprotein phosphatase/ protein binding / protein serine/threonine phosphatase	0	signal transduction
Bra004720	18.9897	45.4039	1.2576	1.59206e-13	6.75874e-13	XP_002881873.1	hypothetical protein ARALYDRAFT_483376	0	unkown funciton
Bra004727	62.8319	9.97537	-2.65506	2.82174e-131	4.6833e-130	NP_565989.1	ATMPK20; MAP kinase	0	kinase
Bra004741	64.5056	29.3188	-1.1376	8.92922e-45	7.47606e-44	NP_850383.2	protease-associated (PA) domain-containing protein	0	protein degradation
Bra004743	17.9365	55.5421	1.63069	0	0	NP_181837.1	aconitase C-terminal domain-containing protein	3.04878e-111	universal stress related
Bra004748	17.8494	74.5764	2.06284	0	0	AAC64303.1	hypothetical protein	1.50348e-84	unkown funciton
Bra004750	42.2288	10.4744	-2.01137	6.37206e-112	9.61167e-111	AAK91471.1	At2g43170/F14B2.11	0	unkown funciton
Bra004763	30.9271	118.669	1.94	0	0	XP_002881904.1	glyoxalase 2-1	3.26943e-155	carbohydrate metabolism
Bra004778	106.849	1823.79	4.09329	4.51394e-12	1.59117e-11	CAA52786.1	Stearoyl-acyl carrier protein desaturase	0	lipid metabolism
Bra004785	74.2051	33.9787	-1.12689	1.5151e-20	8.34166e-20	NP_001118519.1	unknown protein	2.73585e-35	unkown funciton
Bra004786	89.4134	39.0312	-1.19586	7.33462e-104	1.04842e-102	NP_181908.1	formin homology 2 domain-containing protein / FH2 domain-containing protein	0	others
Bra004795	181.082	33.8913	-2.41766	0	0	XP_002881943.1	hypothetical protein ARALYDRAFT_322062	4.90634e-148	unkown funciton
Bra004796	25.2136	9.31028	-1.43731	2.3748e-23	1.38739e-22	XP_002881944.1	inositol 1,3,4-trisphosphate 5/6-kinase family protein	0	kinase
Bra004801	19.9119	64.9517	1.70573	0	0	NP_566007.1	ribosomal protein L2 family protein	3.38993e-75	translation regulation
Bra004803	17.9026	1162.46	6.02086	1.90958e-14	8.82216e-14	XP_002880082.1	hypothetical protein ARALYDRAFT_483527	1.02998e-16	unkown funciton
Bra004805	230.183	93.6516	-1.29741	2.7442e-156	5.01319e-155	BAF81523.1	GDP dissociation inhibitor	0	others
Bra004807	3.31865	133.365	5.32863	3.31068e-13	1.33048e-12	XP_002880085.1	hypothetical protein ARALYDRAFT_483537	8.82791e-143	unkown funciton
Bra004808	8.9227	23.2473	1.38151	0	0	XP_002881949.1	autophagy 4a	0	transporter facilitation
Bra004810	129.585	16.1115	-3.00773	0	0	XP_002880088.1	MTHFR2	0	others
Bra004835	44.6964	11.4837	-1.96057	4.0678e-63	4.22567e-62	XP_002880114.1	glycosyl hydrolase family 1 protein	0	carbohydrate metabolism
Bra004858	25.0573	10.3035	-1.2821	1.56669e-31	1.06423e-30	XP_002880131.1	hypothetical protein ARALYDRAFT_483601	0	unkown funciton
Bra004879	16.9035	3.57949	-2.2395	1.26925e-50	1.15047e-49	XP_002881991.1	histone mono-ubiquitination 1	0	protein degradation
Bra004882	23.8503	7.3611	-1.69602	1.7902e-43	1.47298e-42	XP_002880150.1	hypothetical protein ARALYDRAFT_483630	2.77989e-106	unkown funciton
Bra004884	55.6085	4.92193	-3.49801	4.14096e-214	8.82732e-213	NP_182029.1	mitochondrial elongation factor, putative	0	translation regulation
Bra004887	38.7334	93.285	1.26807	1.85629e-13	7.79345e-13	XP_002881995.1	SEC61 beta	4.52236e-17	transporter facilitation
Bra004892	44.283	214.503	2.27618	5.9015e-12	2.05892e-11	XP_002881717.1	transducin family protein	0	small molecular
Bra004913	32.53	355.388	3.44955	0	0	XP_002882013.1	expressed protein	5.02855e-24	unkown funciton
Bra004915	308.196	43.6712	-2.81909	0	0	AAM66074.1	endosperm-specific protein-like protein	2.00726e-152	unkown funciton
Bra004920	23.1152	1.08475	-4.41341	0	0	NP_182078.1	WD-40 repeat family protein / beige-related	0	unkown funciton
Bra004928	411.169	113.123	-1.86184	2.35606e-224	5.10421e-223	AAQ54337.1	MADS-box protein	1.5242e-83	transcription regulation
Bra004947	18.9321	7.53256	-1.32962	1.84427e-25	1.12284e-24	XP_002880206.1	kinase family protein	0	kinase
Bra004950	542.566	1814.81	1.74194	9.01034e-12	3.10218e-11	BAA92258.1	plasma membrane aquaporin 1b	2.3376e-161	transporter facilitation
Bra004951	9.21342	34.5174	1.90552	5.26246e-14	2.35194e-13	NP_182121.1	CYP86A8; fatty acid (omega-1)-hydroxylase/ oxygen binding	0	lipid metabolism
Bra004953	12.8141	43.5975	1.76652	0	0	XP_002882044.1	hypothetical protein ARALYDRAFT_904051	3.114e-97	unkown funciton
Bra004960	27.5619	91.5548	1.73196	1.68532e-13	7.11398e-13	AAC62896.1	expressed protein	2.97679e-143	unkown funciton
Bra004982	23.1603	78.4356	1.75986	3.82138e-13	1.52155e-12	BAJ34526.1	unnamed protein product	0	unkown funciton
Bra004983	16.8071	4.03714	-2.05767	2.79774e-45	2.36726e-44	XP_002879848.1	hypothetical protein ARALYDRAFT_483058	0	unkown funciton
Bra005012	68.4891	9.38933	-2.86678	1.61581e-208	3.39459e-207	AAK01360.1	AF314811_1 delta 1-pyrroline-5-carboxylate synthetase A	0	Nitrogen metabolism
Bra005018	33.7147	14.3611	-1.23121	2.35796e-34	1.68298e-33	NP_030521.1	dehydration-responsive family protein	0	universal stress related
Bra005025	76.2929	28.7867	-1.40615	4.05204e-35	2.93477e-34	ACT67493.1	expansin A1	1.88289e-148	cell wall
Bra005031	29.6682	64.4003	1.11815	2.04504e-13	8.53204e-13	NP_181487.1	PGGT-I; CAAX-protein geranylgeranyltransferase/protein heterodimerization	5.22577e-171	signal transduction
Bra005036	12.2142	3.16904	-1.94645	6.85058e-48	5.98849e-47	AAM19777.1	At2g39480/F12L6.14	0	unkown funciton
Bra005067	8.32694	128.891	3.95222	0	0	BAD94774.1	hypothetical protein	0	unkown funciton
Bra005071	9.21384	22.9222	1.31487	4.996e-14	2.23818e-13	XP_002879774.1	hypothetical protein ARALYDRAFT_482913	0	unkown funciton
Bra005077	38.7954	16.7282	-1.21361	1.70461e-29	1.11957e-28	XP_002879765.1	hypothetical protein ARALYDRAFT_482892	2.99099e-167	unkown funciton
Bra005086	51.9124	2.50649	-4.37234	0	0	XP_002881616.1	hypothetical protein ARALYDRAFT_482889	0	unkown funciton
Bra005105	22.8987	451.506	4.30141	1.90958e-14	8.8196e-14	XP_002881598.1	hypothetical protein ARALYDRAFT_482856	4.04535e-34	unkown funciton
Bra005107	12.4827	2.20566	-2.50065	1.47169e-66	1.57915e-65	NP_181378.2	SCAR2 (SCAR HOMOLOG 2)	0	others
Bra005126	44.7088	10.6061	-2.07566	2.04884e-111	3.08175e-110	NP_565886.1	FAC1 (EMBRYONIC FACTOR1); AMP deaminase	0	secondary metabolism
Bra005140	87.6988	12.6701	-2.79113	8.60386e-209	1.80993e-207	NP_565881.1	IRX12 (IRREGULAR XYLEM 12); laccase	0	oxidation reduction
Bra005141	40.0235	6.78303	-2.56084	1.73329e-116	2.66358e-115	ACN65500.1	chloroplast carboxyltransferase alpha subunit isoform 2	0	lipid metabolism
Bra005163	12.7581	107.121	3.06976	1.41442e-13	6.0327e-13	XP_002879707.1	aldo/keto reductase family protein	1.43951e-140	oxidation reduction
Bra005183	37.3221	140.013	1.90746	1.02229e-12	3.83516e-12	BAJ34598.1	unnamed protein product	0	unkown funciton
Bra005187	38.1615	5.84343	-2.70723	1.49884e-68	1.63689e-67	XP_002881515.1	hypothetical protein ARALYDRAFT_482750	2.81979e-158	unkown funciton
Bra005215	14.3299	348.378	4.60355	0	0	BAA92260.1	Plasma membrane aquaporin 2b	9.80815e-117	transporter facilitation
Bra005216	23.2506	592.677	4.67191	2.1072e-13	8.77533e-13	AAD39374.1	plasma membrane intrinsic protein 2	8.33854e-126	others
Bra005229	6.77835	15.7777	1.21888	1.28142e-12	4.74265e-12	NP_181234.1	UDP-glucoronosyl/UDP-glucosyl transferase family protein	0	others
Bra005233	27.0317	65.375	1.27409	0	0	XP_002881481.1	MEMB11	4.46358e-100	others
Bra005236	467.178	180.84	-1.36926	1.52527e-287	3.6348e-286	NP_181225.1	MAT3 (methionine adenosyltransferase 3); copper ion binding / methionine adenosyltransferase	0	others
Bra005239	56.6326	3.09413	-4.19403	0	0	ACV04899.1	callose synthase 10	0	cell wall
Bra005261	652.116	1699.43	1.38185	0	0	ABD92697.1	los	0	universal stress related
Bra005264	17.3157	2.40597	-2.84739	4.86868e-103	6.92215e-102	XP_002881450.1	hypothetical protein ARALYDRAFT_482629	0	unkown funciton
Bra005269	36.131	5.69194	-2.66624	5.97716e-121	9.43027e-120	NP_181180.1	SBE2.1 (starch branching enzyme 2.1); 1,4-alpha-glucan branching enzyme	0	carbohydrate metabolism
Bra005281	20.7345	53.5043	1.36762	2.91322e-13	1.18206e-12	Q84WP5.1	RecName: Full=UPF0497 membrane protein At2g36330	2.87746e-57	unkown funciton
Bra005282	29.7737	360.208	3.59672	0	0	NP_565844.1	zinc finger (AN1-like) family protein	5.32367e-64	transcription regulation
Bra005285	69.4077	188.902	1.44447	0	0	XP_002881437.1	hypothetical protein ARALYDRAFT_482602	6.37064e-88	unkown funciton
Bra005291	35.1181	1172.38	5.06108	5.21804e-13	2.03652e-12	XP_002879597.1	hypothetical protein ARALYDRAFT_482594	2.11518e-67	unkown funciton
Bra005306	57.0809	24.331	-1.23021	2.67078e-37	1.99499e-36	AAL14415.1	At2g35880	1.594e-118	unkown funciton
Bra005310	59.2134	21.2269	-1.48003	3.42368e-70	3.80008e-69	XP_002881420.1	hypothetical protein ARALYDRAFT_482564	0	unkown funciton
Bra005315	12.0606	28.3839	1.23477	0	0	BAJ34185.1	unnamed protein product	1.60224e-150	unkown funciton
Bra005318	14.6512	2.86696	-2.35343	2.1449e-100	3.00145e-99	XP_002879562.1	hypothetical protein ARALYDRAFT_482523	0	unkown funciton
Bra005325	33.0492	6.43158	-2.36137	5.76056e-73	6.57441e-72	NP_850250.1	unknown protein	0	unkown funciton
Bra005339	25.7389	56.9359	1.14539	4.15224e-14	1.87147e-13	XP_002881398.1	hypothetical protein ARALYDRAFT_482509	2.70121e-55	unkown funciton
Bra005368	56.6935	4.56523	-3.63442	0	0	NP_001031485.1	GRL (GNARLED); transcription activator	0	transcription regulation
Bra005371	23.4507	4.33714	-2.43481	2.4822e-64	2.60909e-63	XP_002881372.1	AICARFT/IMPCHase bienzyme family protein	0	others
Bra005377	22.2898	5.06502	-2.13775	1.31541e-50	1.19163e-49	XP_002879527.1	eIF4-gamma/eIF5/eIF2-epsilon domain-containing protein	0	transcription regulation
Bra005395	12.1509	33.2656	1.45297	4.10782e-14	1.85774e-13	XP_002881356.1	beta-tubulin R2242-rice	0	cytoskeleton
Bra005402	14.8228	4.76238	-1.63806	5.5671e-53	5.1996e-52	XP_002879509.1	multidrug resistance-associated protein 2	0	universal stress related
Bra005414	46.9138	22.0552	-1.08889	7.7439e-23	4.46123e-22	XP_002879503.1	hypothetical protein ARALYDRAFT_482419	0	unkown funciton
Bra005423	26.8751	54.9625	1.03218	8.4488e-13	3.20156e-12	ABG29728.1	chloroplast chlorophyll a/b binding protein	1.00516e-100	oxidation reduction
Bra005438	221.216	14.7451	-3.90715	0	0	NP_180977.1	dehydration-responsive protein-related	0	universal stress related
Bra005441	146	68.9751	-1.08182	1.04036e-80	1.26849e-79	AAK32885.1	AF367298_1 At2g34250/F13P17.9	0	unkown funciton
Bra005465	50.9112	21.8159	-1.22261	2.99254e-44	2.48921e-43	AAB62404.1	auxin response transcription factor 3	0	transcription regulation
Bra005469	1138.18	4064.3	1.83627	0	0	NP_850220.1	dormancy/auxin associated family protein	3.5282e-46	secondary metabolism
Bra005489	75.5312	33.1638	-1.18746	2.4091e-21	1.34469e-20	NP_180909.2	protein binding	1.76386e-56	unkown funciton
Bra005491	18.9533	8.60616	-1.13901	1.02625e-16	5.10932e-16	NP_180907.2	hydroxyproline-rich glycoprotein family protein	0	universal stress related
Bra005501	16.7675	43.0466	1.36023	0	0	ACG69528.1	caleosin CLO3-2	1.47432e-120	transporter facilitation
Bra005504	64.2431	7.82312	-3.03772	3.62856e-152	6.54268e-151	NP_850206.4	nucleotide binding / ubiquitin-protein ligase	0	protein degradation
Bra005508	63.4605	340.081	2.42195	0	0	BAJ34122.1	unnamed protein product	3.94161e-82	unkown funciton
Bra005514	55.5519	5.15934	-3.42858	3.01396e-156	5.50285e-155	XP_002881268.1	hypothetical protein ARALYDRAFT_902390	0	unkown funciton
Bra005522	159.777	489.291	1.61463	0	0	CAA63598.1	glyoxysomal beta-ketoacyl-thiolase	0	lipid metabolism
Bra005539	41.9946	9.06648	-2.21159	2.42902e-87	3.1101e-86	AAB91973.1	expressed protein	0	unkown funciton
Bra005543	42.8404	17.9126	-1.258	2.98516e-31	2.01661e-30	XP_002881253.1	hypothetical protein ARALYDRAFT_345050	7.45586e-178	unkown funciton
Bra005564	70.1883	206.883	1.55951	0	0	NP_180831.1	CB5-B (CYTOCHROME B5 ISOFORM B); heme binding	1.13683e-60	secondary metabolism
Bra005566	39.2337	7.16128	-2.4538	1.38302e-107	2.03614e-106	XP_002879407.1	WD-40 repeat family protein	0	unkown funciton
Bra005575	49.0695	16.681	-1.55662	6.4496e-140	1.10967e-138	NP_565741.4	unknown protein	0	unkown funciton
Bra005578	97.0375	37.2098	-1.38286	3.95066e-50	3.5547e-49	BAA09642.1	CTP:phosphocholine cytidylyltransferase	1.67387e-157	lipid metabolism
Bra005598	17.3443	111.773	2.68804	5.10702e-15	2.41639e-14	XP_002881228.1	hypothetical protein ARALYDRAFT_482175	0	unkown funciton
Bra005612	54.3923	145.286	1.41742	1.00808e-13	4.3863e-13	AAM65027.1	unknown	1.0481e-69	unkown funciton
Bra005614	17.0006	44.4084	1.38524	0	0	XP_002881215.1	hypothetical protein ARALYDRAFT_902256	2.35888e-147	unkown funciton
Bra005624	39.0753	12.1974	-1.67969	7.0078e-170	1.35051e-168	Q9SL03.2	CALS2_ARATH RecName: Full=Callose synthase 2	0	cell wall
Bra005632	23.6037	77.3774	1.7129	0	0	XP_002881211.1	hypothetical protein ARALYDRAFT_902251	6.09327e-90	unkown funciton
Bra005639	29.8797	8.71274	-1.77797	1.18626e-45	1.00801e-44	NP_180741.1	ankyrin repeat family protein	0	others
Bra005669	7.93501	34.0918	2.10312	5.34462e-13	2.08235e-12	XP_002870901.1	F-box family protein	0	protein degradation
Bra005670	69.0241	13.6747	-2.33559	7.23854e-120	1.13586e-118	XP_002870902.1	hypothetical protein ARALYDRAFT_486898	0	unkown funciton
Bra005678	32.108	10.2706	-1.64442	2.27002e-37	1.69922e-36	XP_002873003.1	hypothetical protein ARALYDRAFT_907991	0	unkown funciton
Bra005682	64.0679	165.478	1.36896	2.36256e-13	9.71961e-13	BAJ34285.1	unnamed protein product	1.69673e-124	unkown funciton
Bra005691	48.3649	11.3373	-2.09289	7.5641e-97	1.03801e-95	NP_195749.2	mRNA guanylyltransferase/ phosphatase/ polynucleotide 5'-phosphatase/ protein tyrosine phosphatase/ protein tyrosine/serine/threonine phosphatase	0	DNA or RNA binding
Bra005692	15.4954	7.5724	-1.03302	1.52368e-14	7.06383e-14	XP_002870934.1	hypothetical protein ARALYDRAFT_486948	0	unkown funciton
Bra005704	92.8243	272.872	1.55565	5.56e-13	2.161e-12	XP_002870948.1	prenylated rab acceptor family protein	9.43247e-99	transporter facilitation
Bra005716	13.9062	48.3548	1.79793	3.17524e-14	1.44788e-13	XP_002873046.1	hypothetical protein ARALYDRAFT_487008	0	unkown funciton
Bra005720	306.545	854.987	1.4798	0	0	P56170.1	Metallothionein-like protein type 2, MT2-22	5.19968e-29	transporter facilitation
Bra005731	285.094	858.87	1.591	1.63447e-12	5.98618e-12	AAO64770.1	At5g02580	4.39922e-36	unkown funciton
Bra005735	92.8801	31.6302	-1.55407	4.02208e-65	4.25994e-64	NP_195950.1	ADK2 (ADENOSINE KINASE 2); adenosine kinase/ copper ion binding / kinase	0	kinase
Bra005738	25.8299	150.893	2.54642	0	0	XP_002871018.1	hypothetical protein ARALYDRAFT_908188	2.28589e-59	unkown funciton
Bra005739	74.6587	185.252	1.3111	1.64757e-13	6.98326e-13	AAG40023.1	unnamed protein product	8.09255e-34	unkown funciton
Bra005740	85.0364	27.091	-1.65027	2.83784e-46	2.43277e-45	XP_002873077.1	hypothetical protein ARALYDRAFT_487087	1.02848e-92	unkown funciton
Bra005748	12.3887	3.66423	-1.75744	7.10318e-41	5.62843e-40	XP_002870997.1	ubiquitin-protein ligase 4	0	protein degradation
Bra005759	17.1788	44.3339	1.36778	2.1072e-13	8.77647e-13	CAB85996.1	putative protein	3.2454e-90	unkown funciton
Bra005765	29.9182	84.5334	1.4985	4.88498e-15	2.3158e-14	NP_568119.1	CDC25; arsenate reductase/ protein tyrosine phosphatase	7.79576e-73	oxidation reduction
Bra005778	24.3454	4.17964	-2.5422	1.7896e-73	2.05196e-72	BAJ34040.1	unnamed protein product	0	unkown funciton
Bra005799	9.56911	27.5628	1.52627	4.10782e-14	1.85485e-13	XP_002873143.1	pectate lyase family protein	0	carbohydrate metabolism
Bra005805	42.754	14.0709	-1.60334	3.77362e-46	3.22891e-45	NP_196062.1	kelch repeat-containing protein	0	others
Bra005828	13.4643	4.37382	-1.62218	3.58646e-34	2.55127e-33	XP_002871124.1	hypothetical protein ARALYDRAFT_908384	0	unkown funciton
Bra005845	119.945	6.88149	-4.12351	0	0	ACS68192.1	cellulose synthase 3.1 catalytic subunit	0	cell wall
Bra005846	28.8244	14.2654	-1.01477	1.848e-13	7.76681e-13	NP_196137.1	unknown protein	9.89531e-109	unkown funciton
Bra005847	26.6977	4.53537	-2.55742	5.55518e-68	6.03585e-67	Q9FHK4.1	RecName: Full=Uncharacterized protein At5g05190	1.63108e-144	unkown funciton
Bra005881	28.3266	10.2472	-1.46692	4.08848e-29	2.66553e-28	NP_182320.1	SWA1 (SLOW WALKER1); nucleotide binding	0	transcription regulation
Bra005893	74.7956	233.641	1.64327	0	0	XP_002873253.1	NC domain-containing protein	6.05078e-134	others
Bra005900	66.0061	4.47176	-3.88368	0	0	BAJ34172.1	unnamed protein product	0	unkown funciton
Bra005906	19.5327	7.92626	-1.30118	1.8513e-19	9.95075e-19	XP_002871228.1	hypothetical protein ARALYDRAFT_487481	0	unkown funciton
Bra005917	31.3695	65.8558	1.06995	3.69038e-13	1.47159e-12	ABX46557.1	polygalacturonase inhibitor protein 11	1.62707e-162	cell wall
Bra005931	24.3661	5.137	-2.24588	1.14369e-47	9.97312e-47	XP_002871263.1	hypothetical protein ARALYDRAFT_487555	0	unkown funciton
Bra005933	74.1418	7.59023	-3.28807	0	0	XP_002873305.1	tudor domain-containing protein	0	unkown funciton
Bra005935	21.1282	66.5143	1.65449	6.03074e-13	2.33063e-12	NP_196361.1	GDH2 (GLUTAMATE DEHYDROGENASE 2); ATP binding / glutamate dehydrogenase	0	Nitrogen metabolism
Bra005970	10.9846	25.4233	1.21066	2.74602e-12	9.85709e-12	XP_002871309.1	zinc finger family protein	4.79209e-69	transcription regulation
Bra005979	131.643	54.7203	-1.26648	1.11888e-93	1.5006e-92	XP_002871313.1	hypothetical protein ARALYDRAFT_908774	0	unkown funciton
Bra005992	10.5364	24.7124	1.22985	2.06502e-13	8.60978e-13	XP_002873359.1	hypothetical protein ARALYDRAFT_325438	0	unkown funciton
Bra005994	30.4916	9.58714	-1.66924	3.75764e-59	3.75564e-58	NP_196462.2	unknown protein	0	unkown funciton
Bra006004	210.064	38.01	-2.46638	2.22056e-281	5.26032e-280	XP_002873372.1	transducin family protein	0	small molecular
Bra006015	7.92225	93.1608	3.55574	0	0	AAP35051.1	NAC-domain protein 5-7	9.17081e-155	transcription regulation
Bra006020	17.5532	5.4657	-1.68325	3.34094e-35	2.42469e-34	NP_568213.2	KUP7; potassium ion transmembrane transporter	0	transporter facilitation
Bra006027	30.2144	14.699	-1.03951	1.235e-23	7.2642e-23	BAJ34398.1	unnamed protein product	0	unkown funciton
Bra006036	46.3749	7.47894	-2.63244	7.26346e-194	1.47641e-192	ACS68195.1	cellulose synthase 5.1 catalytic subunit	0	cell wall
Bra006038	43.9239	15.42	-1.51021	7.28406e-37	5.40683e-36	XP_002873430.1	EMB2107	0	unkown funciton
Bra006052	81.689	190.281	1.21991	2.64456e-13	1.08074e-12	AAZ66933.1	117M18_14	5.33235e-114	unkown funciton
Bra006053	59.6352	18.9873	-1.65113	3.3534e-76	3.91532e-75	AAZ66934.1	117M18_15	0	unkown funciton
Bra006067	21.2413	5.9752	-1.82981	2.95146e-38	2.24296e-37	XP_002871425.1	hypothetical protein ARALYDRAFT_487887	0	unkown funciton
Bra006079	48.6968	18.7232	-1.379	1.05038e-54	1.00065e-53	XP_002873480.1	hypothetical protein ARALYDRAFT_909044	0	unkown funciton
Bra006080	88.0232	41.5368	-1.08349	1.63308e-62	1.68987e-61	XP_002873480.1	hypothetical protein ARALYDRAFT_909044	0	unkown funciton
Bra006082	57.0809	14.8115	-1.94629	1.95929e-42	1.59404e-41	NP_196656.1	cylicin-related	1.30075e-30	others
Bra006083	77.8468	190.795	1.29331	1.00209e-12	3.7629e-12	Q9LEU4.1	Probable CCR4-associated factor 1 homolog 10	1.26672e-148	DNA or RNA binding
Bra006088	10.4736	269.485	4.68538	0	0	NP_196670.1	serine-rich protein-related	6.16697e-72	universal stress related
Bra006091	60.3426	28.6005	-1.07714	1.779e-37	1.33385e-36	NP_001154706.1	DEAD/DEAH box helicase, putative	0	DNA or RNA binding
Bra006100	66.1079	6.97504	-3.24455	7.36132e-265	1.70217e-263	XP_002871476.1	adaptin family protein	0	others
Bra006103	78.1239	233.763	1.58121	3.0358e-12	1.0868e-11	XP_002873517.1	hypothetical protein ARALYDRAFT_487989	0	unkown funciton
Bra006107	356.343	66.4447	-2.42304	0	0	XP_002871486.1	NADP-malic enzyme 2	0	carbohydrate metabolism
Bra006124	21.7809	9.65912	-1.1731	1.68628e-15	8.10351e-15	Q949X7.1	DCDA1_ARATH RecName: Full=Diaminopimelate decarboxylase 1, chloroplastic	0	Nitrogen metabolism
Bra006179	18.8107	38.4037	1.02969	6.13432e-11	2.02342e-10	XP_002873598.1	hypothetical protein ARALYDRAFT_488125	3.26009e-36	unkown funciton
Bra006186	32.5521	129.219	1.98899	5.77316e-15	2.72391e-14	BAJ33903.1	unnamed protein product	1.43184e-121	unkown funciton
Bra006195	5.73012	126.934	4.46937	2.36034e-13	9.72551e-13	BAJ34121.1	unnamed protein product	5.49667e-71	unkown funciton
Bra006204	31.1131	64.9861	1.06261	7.12098e-13	2.72198e-12	XP_002871571.1	hypothetical protein ARALYDRAFT_488171	0	unkown funciton
Bra006205	29.0903	4.89728	-2.57049	3.47226e-177	6.79826e-176	NP_196857.2	KEG (KEEP ON GOING); protein binding / protein kinase/ ubiquitin-protein ligase	0	protein degradation
Bra006210	126.92	47.4861	-1.41835	3.89356e-105	5.60564e-104	NP_196874.1	ATPAO1 (ARABIDOPSIS THALIANA POLYAMINE OXIDASE 1); FAD binding / polyamine oxidase	0	oxidation reduction
Bra006212	8.3551	29.3732	1.81377	2.4336e-13	9.98358e-13	NP_196878.2	ZIF1 (ZINC INDUCED FACILITATOR 1); carbohydrate transmembrane transporter/sugar:hydrogen symporter/ tetracycline:hydrogen antiporter	2.81057e-129	transporter facilitation
Bra006227	67.5634	2.31529	-4.86697	0	0	XP_002871594.1	glycosyl hydrolase family 38 protein	0	carbohydrate metabolism
Bra006239	2.89825	42.42	3.87149	1.33671e-13	5.7211e-13	BAJ34083.1	unnamed protein product	0	unkown funciton
Bra006245	16.4357	38.4958	1.22787	0	0	XP_002873657.1	hypothetical protein ARALYDRAFT_488258	9.47561e-100	unkown funciton
Bra006254	45.3179	10.4948	-2.11041	7.86072e-84	9.80916e-83	ABV89662.1	dehydration-responsive protein-related	0	universal stress related
Bra006260	112.573	25.0993	-2.16515	1.26939e-206	2.64591e-205	XP_002873673.1	hypothetical protein ARALYDRAFT_325922	0	unkown funciton
Bra006262	37.1497	18.1798	-1.03102	1.45401e-20	8.00948e-20	XP_002873679.1	hypothetical protein ARALYDRAFT_488300	0	unkown funciton
Bra006273	414.891	47.6939	-3.12086	0	0	BAJ34616.1	unnamed protein product	6.25693e-35	unkown funciton
Bra006276	17.798	3.3149	-2.42468	6.63212e-86	8.38746e-85	XP_002873701.1	hypothetical protein ARALYDRAFT_488346	0	unkown funciton
Bra006280	73.5942	738.193	3.32633	0	0	AAP37696.1	At5g15120	5.96149e-131	unkown funciton
Bra006294	22.6044	9.46906	-1.25531	3.81798e-21	2.12477e-20	XP_002871657.1	KH domain-containing protein	0	others
Bra006301	19.027	8.68966	-1.13067	5.71946e-14	2.55048e-13	NP_197051.2	GAUT14 (Galacturonosyltransferase 14); polygalacturonate 4-alpha-galacturonosyltransferase/ transferase, transferring glycosyl groups / transferase, transferring hexosyl groups	0	carbohydrate metabolism
Bra006303	56.3688	19.7494	-1.51309	3.45358e-53	3.23601e-52	CAC01748.1	UDP-glucose dehydrogenase-like protein	0	carbohydrate metabolism
Bra006323	29.3237	10.0618	-1.54318	4.51282e-35	3.26627e-34	Q9LFU5.3	TRM1_ARATH RecName: Full=Probable N(2),N(2)-dimethylguanosine tRNA methyltransferase 1; AltName: Full=tRNA 2,2-dimethylguanosine-26 methyltransferase 1; AltName: Full=tRNA(guanine-26,N(2)-N(2)) methyltransferase 1; AltName: Full=tRNA(m(2,2)G26)dimethyltransferase 1	0	translation regulation
Bra006338	108.705	18.665	-2.542	7.23052e-185	1.44217e-183	XP_002884325.1	hypothetical protein ARALYDRAFT_477487	0	unkown funciton
Bra006339	47.6793	656.901	3.78424	5.77316e-15	2.72472e-14	XP_002873758.1	AT5g16110	9.34816e-57	unkown funciton
Bra006350	6.87659	31.0081	2.17288	6.0174e-14	2.67103e-13	XP_002873771.1	hypothetical protein ARALYDRAFT_488489	0	unkown funciton
Bra006351	41.89	137.213	1.71173	6.83898e-14	3.02352e-13	XP_002873772.1	hypothetical protein ARALYDRAFT_909618	2.60211e-80	unkown funciton
Bra006367	19.84	3.12687	-2.66562	2.47784e-62	2.55654e-61	NP_197175.1	unknown protein	0	unkown funciton
Bra006372	45.9532	15.9617	-1.52555	4.23384e-26	2.61356e-25	ABB83612.1	syntaxin-like protein	2.57341e-77	transporter facilitation
Bra006395	124.524	710.085	2.51157	3.66108e-12	1.30087e-11	BAJ34372.1	unnamed protein product	0	unkown funciton
Bra006407	135.946	13.6193	-3.31931	0	0	ACS68197.1	cellulose synthase 7.1 catalytic subunit	0	cell wall
Bra006415	10.6378	22.1534	1.05833	4.83688e-10	1.52685e-09	XP_002873838.1	hypothetical protein ARALYDRAFT_488627	6.75126e-110	unkown funciton
Bra006416	72.4862	355.184	2.29279	6.4615e-14	2.86139e-13				no homology
Bra006424	20.4906	48.2661	1.23605	7.04548e-13	2.6957e-12	XP_002873857.1	hypothetical protein ARALYDRAFT_488650	3.01281e-66	unkown funciton
Bra006428	17.7447	2.41086	-2.87977	3.63326e-105	5.2356e-104	NP_197293.1	unknown protein	0	unkown funciton
Bra006429	423.896	27.7173	-3.93485	0	0	XP_002871787.1	cobalamin-independent methionine synthase	0	Nitrogen metabolism
Bra006445	20.356	6.95269	-1.54981	7.34276e-29	4.76675e-28	NP_197320.1	protein kinase family protein	0	kinase
Bra006446	37.6491	10.8664	-1.79274	2.1583e-78	2.58034e-77	XP_002873878.1	transcription regulator NOT2/NOT3/NOT5 family protein	0	transcription regulation
Bra006450	29.8981	12.1404	-1.30024	1.75594e-46	1.50976e-45	NP_197329.4	ATAPY2 (ARABIDOPSIS THALIANA APYRASE 2); ATPase/ nucleotide diphosphatase	0	Energy
Bra006457	26.4122	3.8141	-2.79179	1.82266e-139	3.1292e-138	NP_974801.2	PIR121; transcription activator	0	transcription regulation
Bra006472	4.7646	50.3607	3.40187	0	0	NP_197368.1	BMY3; beta-amylase/ catalytic/ cation binding	1.01011e-137	carbohydrate metabolism
Bra006482	51.1962	139.001	1.44098	5.26246e-14	2.3503e-13	AAS76221.1	At5g18850	3.321e-28	unkown funciton
Bra006512	20.1024	61.8577	1.62159	0	0	XP_002873957.1	hypothetical protein ARALYDRAFT_488857	2.43134e-101	unkown funciton
Bra006513	15.5129	4.48235	-1.79114	1.16354e-40	9.17645e-40	NP_197467.1	S1P (SITE-1 PROTEASE); endopeptidase/ serine-type endopeptidase	0	protein degradation
Bra006514	65.8738	4.27085	-3.94711	1.83799e-286	4.37678e-285	XP_002871900.1	hypothetical protein ARALYDRAFT_488863	0	unkown funciton
Bra006517	158.902	68.3336	-1.21747	7.71604e-100	1.07738e-98	NP_197478.1	TUA3; structural constituent of cytoskeleton	0	cytoskeleton
Bra006519	25.5483	3.7657	-2.76224	3.72288e-117	5.75425e-116	XP_002873965.1	EMB2734	0	others
Bra006529	83.175	34.8125	-1.25654	5.803e-52	5.36035e-51	NP_568389.1	RPT6A (REGULATORY PARTICLE TRIPLE-A ATPASE 6A); ATPase	0	Energy
Bra006530	169.443	522.554	1.62478	3.41216e-12	1.21581e-11	XP_002871916.1	hypothetical protein ARALYDRAFT_910039	3.8358e-117	unkown funciton
Bra006542	18.661	54.0889	1.5353	1.03917e-13	4.5148e-13	AAX22278.1	hypothetical protein	1.9474e-56	unkown funciton
Bra006543	49.9735	162.841	1.70423	1.22813e-12	4.55862e-12	NP_197515.1	SPX1 (SPX DOMAIN GENE 1)	1.01238e-101	others
Bra006561	22.361	4.75333	-2.23397	2.0234e-111	3.04492e-110	XP_002873998.1	predicted protein	0	unkown funciton
Bra006563	21.5186	70.0651	1.70311	5.147e-13	2.01002e-12	NP_197554.2	/1.25125e-166/ATBRXL4 (BREVIS RADIX-LIKE 4)	1.25125e-166	others
Bra006578	774.8	3397.19	2.13244	0	0	XP_002874016.1	hypothetical protein ARALYDRAFT_910122	0	unkown funciton
Bra006579	61.4479	17.194	-1.83746	1.37381e-128	2.25785e-127	XP_002874017.1	phosphoinositide phosphatase family protein	0	secondary metabolism
Bra006584	42.7535	15.6051	-1.45402	4.40406e-59	4.40034e-58	XP_002874021.1	hypothetical protein ARALYDRAFT_910130	0	unkown funciton
Bra006603	56.535	24.6391	-1.1982	2.49968e-29	1.63637e-28	XP_002871983.1	hypothetical protein ARALYDRAFT_489047	1.62656e-131	unkown funciton
Bra006608	33.5647	71.1765	1.08446	2.2271e-13	9.22532e-13	XP_002874044.1	hypothetical protein ARALYDRAFT_489058	0	unkown funciton
Bra006616	10.9771	26.48	1.27041	1.55875e-13	6.62351e-13	Q9FMS6.1	Probable CCR4-associated factor 1 homolog 11	4.0097e-121	others
Bra006626	38.0612	15.608	-1.28603	7.53108e-76	8.7706e-75	NP_197637.2	unknown protein	0	unkown funciton
Bra006633	125.053	34.9524	-1.83907	7.85796e-161	1.46399e-159	XP_002874083.1	hypothetical protein ARALYDRAFT_489123	0	unkown funciton
Bra006650	9.97917	36.2761	1.86203	0	0	XP_002866389.1	hypothetical protein ARALYDRAFT_919301	3.37088e-144	unkown funciton
Bra006659	90.2915	182.666	1.01655	0	0	NP_200854.1	sec61beta family protein	1.53554e-20	others
Bra006685	25.3246	86.6276	1.77429	1.19238e-13	5.14336e-13	XP_002874101.1	hypothetical protein ARALYDRAFT_489144	1.3576e-45	unkown funciton
Bra006688	30.4559	73.45	1.27004	0	0	XP_002866356.1	hypothetical protein ARALYDRAFT_358205	7.91073e-55	unkown funciton
Bra006696	7.26149	43.7762	2.59181	0	0	NP_001032105.1	ATEXO70H7 (EXOCYST SUBUNIT EXO70 FAMILY PROTEIN H7); protein binding	0	others
Bra006698	28.2129	10.1188	-1.47932	2.6859e-33	1.88213e-32	NP_568912.2	VIP2 (VIRE2 INTERACTING PROTEIN2); protein binding / transcription regulator	0	transcription regulation
Bra006709	20.0652	69.8864	1.80031	0	0	NP_568910.1	zinc finger (C3HC4-type RING finger) family protein	5.7901e-130	transcription regulation
Bra006713	60.8914	15.9837	-1.92964	5.00282e-61	5.09911e-60	XP_002866336.1	oxidoreductase	7.99372e-179	oxidation reduction
Bra006716	106.022	13.5645	-2.96646	1.00269e-132	1.67639e-131	XP_002866331.1	hypothetical protein ARALYDRAFT_496081	2.54989e-144	unkown funciton
Bra006743	36.2436	16.0654	-1.17376	8.1226e-26	4.98422e-25	XP_002862636.1	cytochrome P450	0	oxidation reduction
Bra006745	16.6869	398.575	4.57806	0	0	AAM67171.1	RNA-binding protein-like protein	9.55307e-110	DNA or RNA binding
Bra006776	26.3359	8.51372	-1.62917	5.6217e-42	4.53671e-41	BAJ34488.1	unnamed protein product	0	unkown funciton
Bra006784	112.188	2111.97	4.2346	1.08358e-12	4.05032e-12	ABB02398.1	temperature-induced lipocalin	1.50459e-107	universal stress related
Bra006790	44.8688	3.31479	-3.75873	1.82992e-201	3.77243e-200	XP_002866243.1	ubiquitin-specific protease 23	0	protein degradation
Bra006812	14.3642	5.35363	-1.42389	3.4811e-28	2.22993e-27	XP_002864520.1	kinase family protein	0	kinase
Bra006817	111.775	54.4417	-1.03781	2.16664e-34	1.54781e-33	XP_002866208.1	hypothetical protein ARALYDRAFT_495848	3.37846e-130	unkown funciton
Bra006857	128.984	296.831	1.20245	4.47998e-12	1.57972e-11	XP_002866165.1	serine O-acetyltransferase Sat-52	6.53524e-136	Nitrogen metabolism
Bra006865	22.6209	89.1738	1.97896	0	0	BAJ34266.1	unnamed protein product	1.75388e-61	unkown funciton
Bra006872	68.7975	143.309	1.05871	3.18634e-13	1.28504e-12	AAM61297.1	unknown	4.38649e-12	unkown funciton
Bra006875	22.9657	4.04303	-2.50597	1.45162e-80	1.76589e-79	BAJ34198.1	unnamed protein product	0	unkown funciton
Bra006877	22.336	90.4939	2.01845	0	0	XP_002877824.1	hypothetical protein ARALYDRAFT_485534	1.41621e-108	unkown funciton
Bra006882	13.8588	348.815	4.65359	0	0	CAE46442.1	sulphate transporter	0	transporter facilitation
Bra006890	8.50648	46.8247	2.46064	0	0	XP_002876113.1	kinase family protein	5.0348e-162	kinase
Bra006893	17.5059	129.165	2.8833	2.30704e-13	9.5379e-13	XP_002877841.1	hypothetical protein ARALYDRAFT_485566	9.03103e-137	unkown funciton
Bra006902	21.2352	1.71912	-3.62671	2.9002e-159	5.36571e-158	NP_190782.3	tetratricopeptide repeat (TPR)-containing protein	0	others
Bra006908	262.104	24.114	-3.4422	0	0	XP_002877847.1	starch-excess 4	8.47698e-162	others
Bra006913	24.0555	79.4226	1.72318	0	0	AAK96513.1	unknown protein	7.04221e-34	unkown funciton
Bra006915	9.635	3.2486	-1.56847	2.42978e-33	1.7049e-32	XP_002876132.1	myb family transcription factor	0	transcription regulation
Bra006922	38.5921	6.71022	-2.52387	2.08012e-79	2.50942e-78	XP_002876143.1	phytoalexin deficient 4	0	others
Bra006937	23.0601	79.0373	1.77714	0	0	NP_566970.1	unknown protein	1.44626e-168	unkown funciton
Bra006938	43.2687	14.2678	-1.60056	9.62826e-38	7.25482e-37	XP_002876162.1	RNA recognition motif-containing protein	4.17313e-131	DNA or RNA binding
Bra006949	244.932	1580.15	2.68961	6.49126e-12	2.25604e-11	NP_190848.1	zinc finger (AN1-like) family protein	3.24774e-74	transcription regulation
Bra006960	232.842	532.591	1.19368	0	0	CAB86897.1	fructose bisphosphate aldolase-like protein	0	carbohydrate metabolism
Bra006975	6.8322	19.4102	1.50639	1.50546e-13	6.40986e-13	XP_002876191.1	hypothetical protein ARALYDRAFT_485693	0	unkown funciton
Bra006981	179.397	597.754	1.7364	0	0	XP_002877908.1	hypothetical protein ARALYDRAFT_906710	1.1139e-15	unkown funciton
Bra006997	24.6756	435.786	4.14246	3.35732e-13	1.34584e-12	AAD39373.1	plasma membrane intrinsic protein 1	9.56954e-155	transporter facilitation
Bra007007	39.2694	9.03489	-2.11983	1.67978e-49	1.4975e-48	NP_850694.2	UXS1 (UDP-GLUCURONIC ACID DECARBOXYLASE 1); UDP-glucuronate decarboxylase/ catalytic	0	carbohydrate metabolism
Bra007019	57.7838	25.4463	-1.18321	5.65868e-17	2.8376e-16	XP_002876220.1	hypothetical protein ARALYDRAFT_485755	3.2582e-45	unkown funciton
Bra007020	35.2521	9.81357	-1.84486	8.26766e-42	6.65183e-41	XP_002877936.1	hypothetical protein ARALYDRAFT_485760	2.38881e-178	unkown funciton
Bra007033	196.001	448.311	1.19364	1.21037e-12	4.50054e-12	XP_002877945.1	40S ribosomal protein S21	4.66231e-38	translation regulation
Bra007039	35.5264	14.897	-1.25387	1.11981e-18	5.87947e-18	XP_002876235.1	hypothetical protein ARALYDRAFT_485794	1.45838e-67	unkown funciton
Bra007051	9.72761	21.5362	1.14661	1.98254e-10	6.37997e-10	XP_002877960.1	hypothetical protein ARALYDRAFT_485812	4.09603e-154	unkown funciton
Bra007053	44.5109	9.03466	-2.30062	8.0394e-71	8.98572e-70	XP_002877961.1	hypothetical protein ARALYDRAFT_906825	0	unkown funciton
Bra007057	12.6782	4.66177	-1.4434	8.59264e-24	5.0672e-23	ADE44117.1	suppressor of ABI3-5	0	signal transduction
Bra007059	25.9582	12.299	-1.07765	6.74294e-14	2.98313e-13	NP_566995.1	mevalonate diphosphate decarboxylase, putative	0	secondary metabolism
Bra007070	614.447	79.5285	-2.94975	0	0	BAJ34532.1	unnamed protein product	0	unkown funciton
Bra007079	53.9053	23.0754	-1.22407	2.95426e-55	2.83043e-54	XP_002876258.1	ATGCN4	0	unkown funciton
Bra007087	56.0182	27.5542	-1.02362	1.46225e-34	1.04954e-33	AAK27157.1	AF349449_1 glutathione reductase	0	oxidation reduction
Bra007088	23.9297	1.76802	-3.75859	3.27712e-160	6.09483e-159	NP_191027.3	TTN8 (TITAN8); ATP binding / transporter	0	transporter facilitation
Bra007089	34.2997	1609.71	5.55246	5.10702e-15	2.41711e-14	XP_002876264.1	hypothetical protein ARALYDRAFT_485873	2.39326e-50	unkown funciton
Bra007091	33.1489	3.1623	-3.38991	7.97446e-117	1.22781e-115	Q9M1S8.2	Probable glutamate carboxypeptidase 2;	4.21183e-157	protein degradation
Bra007100	11.0383	58.4191	2.40392	0	0	NP_191042.1	PIP2;5 (PLASMA MEMBRANE INTRINSIC PROTEIN 2;5); water channel	7.30044e-147	transporter facilitation
Bra007101	16.9504	46.2206	1.44722	1.88516e-13	7.90944e-13	BAE99394.1	hypothetical protein	1.68786e-51	unkown funciton
Bra007105	51.7323	22.1983	-1.22062	6.81182e-47	5.88852e-46	XP_002876275.1	armadillo/beta-catenin repeat family protein	0	signal transduction
Bra007106	30.1741	6.26427	-2.26809	6.45854e-60	6.51012e-59	XP_002878002.1	ATVPS33	0	others
Bra007119	11.0257	23.5176	1.09287	0	0	XP_002878007.1	hypothetical protein ARALYDRAFT_485912	0	unkown funciton
Bra007120	114.408	22.7938	-2.32747	7.15726e-224	1.54846e-222	BAJ33696.1	unnamed protein product	0	unkown funciton
Bra007127	37.6969	3.44486	-3.45193	2.7895e-157	5.11056e-156	XP_002878011.1	hypothetical protein ARALYDRAFT_324032	0	unkown funciton
Bra007154	75.4348	35.6122	-1.08286	2.13704e-28	1.37557e-27	ACR56738.1	trans-2,3-enoyl-CoA reductase	1.30851e-176	Energy
Bra007157	48.2469	168.851	1.80724	5.77316e-15	2.7227e-14	NP_567020.1	UBC14 (ubiquitin-conjugating enzyme 14); ubiquitin-protein ligase	1.25283e-74	protein degradation
Bra007162	268.065	47.7559	-2.48883	0	0	CAB75901.1	beta-1, 3-glucanase-like protein	0	others
Bra007181	16.1489	36.5415	1.1781	0	0	XP_002876318.1	mitochondrial substrate carrier family protein	2.16543e-165	transporter facilitation
Bra007203	31.9497	123.858	1.95482	2.49356e-13	1.02191e-12	NP_191155.1	NLI interacting factor (NIF) family protein	3.52118e-136	others
Bra007205	192.569	18.2	-3.40337	0	0	NP_567030.1	SZF1 (SALT-INDUCIBLE ZINC FINGER 1); transcription factor	0	transcription regulation
Bra007206	21.7793	9.26918	-1.23244	4.28096e-16	2.09027e-15	XP_002876345.1	hypothetical protein ARALYDRAFT_907033	0	unkown funciton
Bra007215	71.1832	14.2487	-2.3207	2.78198e-62	2.86941e-61	NP_001146869.1	ferritin-1	2.21238e-117	oxidation reduction
Bra007216	19.1669	85.1919	2.1521	7.41628e-14	3.26159e-13	XP_002878068.1	prenylated rab acceptor family protein	9.13803e-96	transporter facilitation
Bra007220	67.7835	11.6281	-2.54332	1.0299e-226	2.2449e-225	NP_191174.1	translation initiation factor	1.63108e-144	translation regulation
Bra007230	40.5434	90.4163	1.15712	1.79856e-14	8.32369e-14	NP_191183.1	CCH (COPPER CHAPERONE); copper chaperone	1.87724e-47	universal stress related
Bra007241	19.1459	4.24082	-2.17462	1.9221e-58	1.91091e-57	BAB85646.1	inflorescence and root apices receptor-like kinase	0	kinase
Bra007243	8.24272	113.154	3.77903	0	0	ACI14407.1	WRKY70-1 transcription factor	1.48438e-133	transcription regulation
Bra007247	5.17295	15.3217	1.56651	0	0	XP_002876367.1	hypothetical protein ARALYDRAFT_486086	8.95844e-177	unkown funciton
Bra007249	46.5429	116.512	1.32385	0	0	XP_002876369.1	hypothetical protein ARALYDRAFT_486090	3.36184e-68	unkown funciton
Bra007255	24.9834	4.89744	-2.35087	5.5204e-88	7.12254e-87	XP_002876374.1	inositol or phosphatidylinositol kinase	0	kinase
Bra007277	125.451	58.271	-1.10627	3.14906e-68	3.43205e-67	BAJ33737.1	unnamed protein product	5.11184e-149	unkown funciton
Bra007279	82.2563	338.549	2.04117	0	0	NP_191247.1	VQ motif-containing protein	7.30645e-74	others
Bra007281	41.2966	15.3167	-1.43092	1.08289e-33	7.65043e-33	NP_191249.2	aladin-related / adracalin-related	0	others
Bra007291	27.9114	5.66799	-2.29995	1.25633e-68	1.37345e-67	XP_002878124.1	hypothetical protein ARALYDRAFT_486142	0	unkown funciton
Bra007292	32.9758	15.6766	-1.07279	1.64829e-12	6.03126e-12	XP_002876391.1	hypothetical protein ARALYDRAFT_486143	2.40172e-100	unkown funciton
Bra007317	124.429	36.5462	-1.76752	1.50156e-131	2.49607e-130	XP_002878144.1	hypothetical protein ARALYDRAFT_486171	0	unkown funciton
Bra007319	34.2094	3.72655	-3.19848	4.5073e-165	8.52675e-164	CAA68234.1	calmodulin-stimulated calcium-ATPase	0	Energy
Bra007321	20.3057	4.61603	-2.13716	1.18698e-54	1.12909e-53	NP_565951.1	nucleoporin interacting component family protein	0	transporter facilitation
Bra007325	17.0096	51.0071	1.58435	5.87308e-13	2.27548e-12	XP_002876416.1	hypothetical protein ARALYDRAFT_486184	3.63242e-155	unkown funciton
Bra007326	42.4432	8.25031	-2.36302	3.34446e-142	5.78854e-141	XP_002878148.1	hypothetical protein ARALYDRAFT_486186	0	unkown funciton
Bra007372	37.9697	99.0453	1.38324	1.24611e-12	4.61572e-12	XP_002878181.1	hypothetical protein ARALYDRAFT_486249	1.46523e-115	unkown funciton
Bra007398	99.6188	46.9827	-1.08429	2.11632e-37	1.58454e-36	NP_567066.1	PP2A-3 (PROTEIN PHOSPHATASE 2A-3); protein serine/threonine phosphatase	0	signal transduction
Bra007402	24.59	4.96993	-2.30678	4.38042e-54	4.14336e-53	XP_002876468.1	hypothetical protein ARALYDRAFT_486308	0	unkown funciton
Bra007403	19.2338	7.61325	-1.33706	8.36378e-20	4.53294e-19	XP_002878228.1	hypothetical protein ARALYDRAFT_907339	0	unkown funciton
Bra007404	33.7429	15.2881	-1.14217	3.2064e-26	1.9843e-25	NP_191420.1	ketol-acid reductoisomerase	0	Nitrogen metabolism
Bra007408	20.4969	6.00638	-1.77084	6.0644e-41	4.8089e-40	NP_567072.1	protein kinase family protein	0	kinase
Bra007412	34.723	14.6656	-1.24346	3.8142e-21	2.12304e-20	BAJ34613.1	unnamed protein product	0	unkown funciton
Bra007415	69.4992	267.001	1.94178	0	0	XP_002878236.1	predicted protein	3.23099e-135	unkown funciton
Bra007423	38.2973	18.4267	-1.05544	1.24339e-19	6.70695e-19	NP_567076.1	magnesium transporter CorA-like family protein	2.09632e-152	transporter facilitation
Bra007444	173.721	13.2524	-3.71245	0	0	XP_002876497.1	hypothetical protein ARALYDRAFT_486400	0	unkown funciton
Bra007445	29.9029	14.1888	-1.07554	5.35646e-15	2.53217e-14	XP_002878266.1	UDP-galactose transporter 6	0	transporter facilitation
Bra007447	20.717	1.97063	-3.39409	1.2748e-128	2.09621e-127	NP_191500.2	protein kinase family protein	0	kinase
Bra007474	20.5016	2.5875	-2.98611	1.42716e-150	2.54885e-149	XP_002878289.1	hypothetical protein ARALYDRAFT_907489	0	unkown funciton
Bra007479	44.8768	3.49499	-3.68261	2.27148e-176	4.4364e-175	XP_002878295.1	hypothetical protein ARALYDRAFT_486447	0	unkown funciton
Bra007492	30.8991	12.156	-1.34589	1.5629e-31	1.06188e-30	Q9M1Y3.1	SKI35_ARATH RecName: Full=F-box/ankyrin repeat protein SKIP35; AltName: Full=SKP1-interacting partner 35	0	protein degradation
Bra007494	53.2845	300.195	2.49411	0	0	XP_002876529.1	kelch repeat-containing F-box family protein	3.23336e-166	protein degradation
Bra007497	79.172	16.8313	-2.23384	1.9169e-151	3.44664e-150	NP_191556.1	MTHFR1 (METHYLENETETRAHYDROFOLATE REDUCTASE 1); methylenetetrahydrofolate reductase (NADPH)	0	oxidation reduction
Bra007499	56.3706	22.3833	-1.33252	6.75054e-41	5.35033e-40	NP_567089.1	MAP2B (METHIONINE AMINOPEPTIDASE 2B); aminopeptidase/ metalloexopeptidase	0	protein degradation
Bra007567	11.3162	31.6471	1.48369	3.35732e-13	1.34533e-12	XP_002876585.1	hypothetical protein ARALYDRAFT_486559	0	unkown funciton
Bra007573	48.6119	12.2106	-1.99318	2.0828e-92	2.7609e-91	XP_002876594.1	GAUT1/LGT1	0	others
Bra007580	21.0882	154.311	2.87133	9.74776e-14	4.24891e-13	XP_002876598.1	hypothetical protein ARALYDRAFT_486593	1.42489e-156	unkown funciton
Bra007603	16.2094	55.8261	1.78411	1.26343e-13	5.43078e-13	BAA32777.1	plasma membrane aquaporin (PAQ1)	6.57241e-164	transporter facilitation
Bra007606	96.2829	202.025	1.06918	0	0	NP_191705.1	BRH1 (BRASSINOSTEROID-RESPONSIVE RING-H2); protein binding/zinc ion binding	9.57811e-92	transporter facilitation
Bra007609	139.854	318.981	1.18955	9.35518e-12	3.2157e-11	XP_002876618.1	glycoside hydrolase family 28 protein	0	carbohydrate metabolism
Bra007616	14.4464	107.225	2.89186	4.3543e-13	1.72257e-12	XP_002876623.1	F-box family protein	0	protein degradation
Bra007620	16.2242	123.336	2.92638	7.41628e-14	3.26249e-13	XP_002878393.1	hypothetical protein ARALYDRAFT_486650	2.00429e-125	unkown funciton
Bra007622	24.9879	11.3596	-1.13731	3.49926e-16	1.71383e-15	NP_191724.1	TUBG1 (GAMMA-TUBULIN); GTP binding / GTPase/ structural molecule	0	small molecular
Bra007634	15.3599	51.8947	1.75641	0	0	XP_002876643.1	hypothetical protein ARALYDRAFT_486691	3.91054e-86	unkown funciton
Bra007651	34.7508	7.42445	-2.22669	1.01253e-139	1.73927e-138	NP_191760.2	unknown protein	0	unkown funciton
Bra007663	119.159	49.3973	-1.27039	2.80758e-91	3.69252e-90	NP_191771.1	tRNA synthetase class II (G, H, P and S) family protein	0	translation regulation
Bra007667	41.5422	91.93	1.14596	1.55431e-12	5.7057e-12	NP_191778.1	DNAJ heat shock N-terminal domain-containing protein	8.64173e-32	universal stress related
Bra007670	9.77412	36.3136	1.89347	4.30766e-14	1.9396e-13	XP_002876670.1	agenet domain-containing protein	0	others
Bra007675	135.293	3.9099	-5.11281	0	0	XP_002878454.1	hypothetical protein ARALYDRAFT_486740	0	unkown funciton
Bra007677	183.537	419.578	1.19287	5.81978e-13	2.2562e-12	XP_002880298.1	cytochrome c oxidase subunit VC family protein	4.03584e-21	oxidation reduction
Bra007679	102.705	42.5431	-1.27151	5.24186e-23	3.03515e-22	XP_002878460.1	ATBZIP53	4.79509e-67	transcription regulation
Bra007695	53.9076	6.6319	-3.023	0	0	XP_002878472.1	ATMRP10	0	transporter facilitation
Bra007698	33.4942	4.66255	-2.84472	1.52809e-72	1.73406e-71	BAJ34035.1	unnamed protein product	0	unkown funciton
Bra007699	30.0633	10.9873	-1.45217	7.2875e-29	4.7328e-28	BAJ34035.1	unnamed protein product	0	unkown funciton
Bra007700	11.6546	24.6813	1.08252	0	0	NP_567132.4	AtATG18a	1.96395e-158	unkown funciton
Bra007701	145.081	312.166	1.10546	9.96092e-13	3.7417e-12	NP_191838.1	NADH-ubiquinone oxidoreductase-related	4.63669e-46	oxidation reduction
Bra007705	152.293	73.0194	-1.06049	1.5556e-84	1.9511e-83	NP_191842.1	AUD1; UDP-glucuronate decarboxylase/ catalytic/ dTDP-glucose 4,6-dehydratase	0	carbohydrate metabolism
Bra007722	12.402	64.0181	2.36791	7.21644e-14	3.18203e-13	NP_191860.1	GID1B (GA INSENSITIVE DWARF1B); hydrolase	0	carbohydrate metabolism
Bra007723	32.6176	68.8921	1.07869	1.13265e-12	4.22534e-12	NP_191862.1	MBD4; DNA binding / DNA demethylase/ methyl-CpG binding	3.58271e-75	transcription regulation
Bra007748	39.5883	13.5035	-1.55174	2.36822e-40	1.86084e-39	XP_002881106.1	ferrochelatase II	0	oxidation reduction
Bra007767	61.6214	164.824	1.41942	5.147e-13	2.00977e-12	XP_002880770.1	hypothetical protein ARALYDRAFT_481481	3.03615e-42	unkown funciton
Bra007774	26.134	52.6348	1.01009	1.30229e-12	4.81432e-12	XP_002878908.1	hypothetical protein ARALYDRAFT_481449	3.07542e-123	unkown funciton
Bra007776	11.1059	25.1134	1.17714	5.89972e-13	2.28358e-12	XP_002880729.1	hypothetical protein ARALYDRAFT_481452	4.60278e-89	unkown funciton
Bra007797	41.8193	18.1045	-1.20782	1.00628e-36	7.45556e-36	XP_002864182.1	hypothetical protein ARALYDRAFT_495327	0	unkown funciton
Bra007802	18.9755	2.52403	-2.91034	1.28729e-136	2.19355e-135	BAF03523.1	CGS1 mRNA stability 1	0	DNA or RNA binding
Bra007807	25.8123	9.73699	-1.40651	1.33229e-25	8.13926e-25	NP_180099.2	unknown protein	0	unkown funciton
Bra007814	52.2963	3.10856	-4.07239	0	0	NP_565587.1	PKL (PICKLE); ATPase/ DNA binding / DNA helicase	0	transcription regulation
Bra007820	103.756	38.1428	-1.44371	2.52996e-70	2.81202e-69	BAJ34450.1	unnamed protein product	3.11231e-178	unkown funciton
Bra007832	50.7341	12.8573	-1.98036	2.71782e-101	3.82495e-100	XP_002872264.1	TIF3B1	0	others
Bra007841	72.2248	283.92	1.97492	5.89306e-13	2.28211e-12	AAL06484.1	At2g24550/F25P17.15	2.49037e-62	unkown funciton
Bra007859	26.016	102.073	1.97213	4.8228e-13	1.89151e-12	XP_002528001.1	serine/thronine protein kinase, putative	0	kinase
Bra007860	76.5023	15.8021	-2.27538	5.36982e-104	7.67911e-103	XP_002880577.1	hypothetical protein ARALYDRAFT_900963	0	unkown funciton
Bra007866	47.4778	21.9396	-1.11372	1.06426e-25	6.50932e-25	XP_002877070.1	hypothetical protein ARALYDRAFT_484564	0	unkown funciton
Bra007869	46.2083	109.725	1.24767	4.46976e-13	1.76497e-12	XP_002887246.1	ATHB29/ZFHD1	4.43381e-87	others
Bra007872	51.7021	163.151	1.65791	3.86358e-14	1.75001e-13	NP_177122.2	SBH1 (SPHINGOID BASE HYDROXYLASE 1); catalytic/ sphingosine hydroxylase	6.64281e-133	lipid metabolism
Bra007881	65.0642	140.972	1.11547	1.40932e-12	5.19254e-12	NP_177136.1	ATHB13; DNA binding / sequence-specific DNA binding / transcription factor	4.89017e-127	transcription regulation
Bra007898	76.6313	29.821	-1.36161	2.42506e-67	2.6224e-66	NP_564985.1	unknown protein	0	unkown funciton
Bra007906	3.3623	7.9157	1.23527	4.10782e-14	1.85721e-13	XP_002888764.1	hypothetical protein ARALYDRAFT_894829	0	unkown funciton
Bra007936	21.4574	50.1669	1.22526	2.06502e-13	8.61203e-13	AAM65573.1	unknown	1.43667e-64	unkown funciton
Bra007937	21.0358	48.6596	1.20988	0	0	Q8W4J8.1	Protein TIFY 7; AltName: Full=Jasmonate ZIM domain-containing protein 9	5.90218e-83	signal transduction
Bra007940	45.8022	20.1476	-1.18481	1.25908e-26	7.84512e-26	NP_177231.2	protein kinase family protein	0	kinase
Bra007961	40.5055	17.3421	-1.22384	3.88964e-16	1.90211e-15	XP_002887345.1	hypothetical protein ARALYDRAFT_894942	6.44902e-120	unkown funciton
Bra007977	43.8765	6.53959	-2.74618	4.2383e-160	7.87328e-159	NP_177297.1	protein kinase family protein	0	kinase
Bra008009	6.27562	15.4012	1.29521	0	0	NP_001117585.1	transporter	0	transporter facilitation
Bra008012	168.607	388.076	1.20268	0	0	XP_002887418.1	hypothetical protein ARALYDRAFT_895064	1.55347e-177	unkown funciton
Bra008013	62.1917	20.5229	-1.59949	2.95032e-65	3.12895e-64	XP_002888860.1	SEC14 cytosolic factor family protein	0	others
Bra008017	22.3436	1355.99	5.92334	0	0	NP_177366.1	basic helix-loop-helix (bHLH) family protein (bHLH096)	2.06363e-119	transcription regulation
Bra008031	19.9203	9.333	-1.09383	6.24188e-29	4.05951e-28	NP_177383.5	unknown protein	0	unkown funciton
Bra008037	46.13	2.52189	-4.19313	2.95686e-247	6.65408e-246	Q9FNX8.1	LOX4_ARATH RecName: Full=Lipoxygenase 4, chloroplastic; Short=AtLOX4; AltName: Full=LOX3-like protein; Flags: Precursor	0	lipid metabolism
Bra008042	31.997	4.19721	-2.93043	2.8638e-165	5.42085e-164	XP_002887447.1	hypothetical protein ARALYDRAFT_316232	0	unkown funciton
Bra008043	52.6099	25.8336	-1.02609	2.81222e-27	1.77091e-26	XP_002887448.1	hypothetical protein ARALYDRAFT_476408	0	unkown funciton
Bra008046	51.0406	104.924	1.03963	1.68532e-13	7.11586e-13	XP_002887449.1	hypothetical protein ARALYDRAFT_476412	2.26032e-71	unkown funciton
Bra008051	18.642	54.657	1.55185	2.00284e-13	8.36035e-13	XP_002888893.1	hypothetical protein ARALYDRAFT_316241	0	unkown funciton
Bra008052	70.1782	17.0907	-2.03781	4.72978e-60	4.77207e-59	XP_002888894.1	hypothetical protein ARALYDRAFT_339498	7.83529e-120	unkown funciton
Bra008066	29.3197	127.444	2.11992	0	0	XP_002888902.1	hypothetical protein ARALYDRAFT_476431	2.60531e-139	unkown funciton
Bra008070	7.06538	74.4338	3.39712	2.35368e-14	1.0816e-13	XP_002887471.1	hypothetical protein ARALYDRAFT_476439	5.07241e-149	unkown funciton
Bra008117	21.9143	9.73485	-1.17064	7.82864e-22	4.41838e-21	NP_177538.1	phosphoribulokinase/uridine kinase family protein	0	kinase
Bra008132	180.392	45.965	-1.97253	3.73384e-169	7.16974e-168	ACH41747.1	ST5a	0	unkown funciton
Bra008169	14.3342	73.4184	2.35668	0	0	BAJ34429.1	unnamed protein product	1.39981e-58	unkown funciton
Bra008171	32.7871	13.7938	-1.24911	5.30134e-23	3.06847e-22	NP_177629.1	ADP-glucose pyrophosphorylase family protein	0	carbohydrate metabolism
Bra008172	247.271	60.4875	-2.03139	1.1983e-170	2.31489e-169	BAJ33919.1	unnamed protein product	1.77221e-89	unkown funciton
Bra008187	162.124	73.2867	-1.14548	6.7152e-65	7.0982e-64	BAJ34425.1	unnamed protein product	1.63524e-134	unkown funciton
Bra008191	45.5394	272.538	2.58127	0	0	XP_002889022.1	hypothetical protein ARALYDRAFT_476684	6.79898e-160	unkown funciton
Bra008210	45.9972	93.0776	1.01689	5.55866e-12	1.94334e-11	CBI37601.3	unnamed protein product	3.24597e-47	unkown funciton
Bra008212	26.1213	3.25195	-3.00585	1.3677e-122	2.18264e-121	NP_565114.1	XRN3; 5'-3' exoribonuclease	0	others
Bra008214	97.1024	32.3961	-1.58369	2.06246e-105	2.98281e-104	XP_002889037.1	hypothetical protein ARALYDRAFT_895440	0	unkown funciton
Bra008224	148.198	478.275	1.69032	7.26708e-12	2.51555e-11	ABV89616.1	pathogenesis-related thaumatin family protein	0	universal stress related
Bra008241	69.5056	235.786	1.76227	7.98584e-12	2.75718e-11	XP_002889063.1	hypothetical protein ARALYDRAFT_895494	0	unkown funciton
Bra008267	19.9649	118.792	2.5729	1.44773e-13	6.16981e-13	XP_002887649.1	hypothetical protein ARALYDRAFT_476818	7.0242e-73	unkown funciton
Bra008279	65.6722	6.34738	-3.37105	0	0	NP_177807.3	eukaryotic translation initiation factor 2 family protein	0	translation regulation
Bra008309	17.496	432.898	4.62893	0	0	AAP35055.1	NAC-domain protein 14	1.06066e-154	transcription regulation
Bra008325	61.4253	8.60716	-2.83522	1.50757e-122	2.40345e-121	NP_177892.1	LAX3 (LIKE AUX1 3); amino acid transmembrane transporter/ auxin influx transmembrane transporter/ transporter	0	transporter facilitation
Bra008343	61.8376	130.487	1.07735	1.5552e-12	5.70764e-12	BAJ34031.1	unnamed protein product	6.47149e-91	unkown funciton
Bra008349	63.6827	149.556	1.23171	5.05374e-13	1.9765e-12	BAJ34542.1	unnamed protein product	2.27462e-129	unkown funciton
Bra008354	12.017	30.4129	1.33961	0	0	NP_177950.1	AtUGT85A4 (UDP-glucosyl transferase 85A4); UDP-glycosyltransferase/ glucuronosyltransferase/ transferase, transferring hexosyl groups	0	carbohydrate metabolism
Bra008385	193.145	39.5398	-2.2883	0	0	XP_002887760.1	VHA-A	0	transporter facilitation
Bra008386	29.4634	6.58821	-2.16096	2.75912e-74	3.17617e-73	XP_002887762.1	vacuolar H+-pyrophosphatase 2	0	transporter facilitation
Bra008405	53.4909	125.272	1.22769	4.77174e-13	1.87494e-12	O64527.1	UPF0678 fatty acid-binding protein-like protein At1g79260	1.53766e-76	lipid metabolism
Bra008416	58.2472	6.62957	-3.1352	7.52774e-113	1.13872e-111	XP_002889251.1	GAPCP-1	0	others
Bra008427	25.1335	5.70345	-2.1397	3.15264e-113	4.78258e-112	ACN59279.1	leucine-rich repeat receptor-like protein kinase	0	kinase
Bra008429	28.159	8.61695	-1.70835	6.05864e-54	5.71384e-53	NP_178208.1	MIF4G domain-containing protein / MA3 domain-containing protein	0	others
Bra008438	55.7914	26.8986	-1.05251	8.40424e-22	4.73738e-21	NP_178197.1	CCR2 (CINNAMOYL COA REDUCTASE); cinnamoyl-CoA reductase	1.39837e-163	signal transduction
Bra008443	53.189	17.411	-1.61113	7.96746e-31	5.34282e-30	XP_002889274.1	predicted protein	2.87674e-123	unkown funciton
Bra008447	69.994	178.259	1.34867	1.73439e-12	6.3347e-12	XP_002887816.1	transducin family protein	0	small molecular
Bra008463	70.3343	33.6657	-1.06295	2.44058e-33	1.71211e-32	P29102.1	LEU3_BRANA RecName: Full=3-isopropylmalate dehydrogenase, chloroplastic	0	carbohydrate metabolism
Bra008474	25.7647	4.8068	-2.42225	5.99602e-117	9.25427e-116	XP_002887831.1	EMB2753	0	others
Bra008489	25.3693	428.381	4.07774	0	0	AAK63976.1	At1g80180	5.12511e-45	unkown funciton
Bra008506	34.1743	0.921076	-5.21345	0	0	NP_176659.6	binding	0	unkown funciton
Bra008509	157.174	28.4958	-2.46354	6.1938e-240	1.37543e-238	AAL08277.1	AT5g61020/maf19_20	2.29881e-111	unkown funciton
Bra008510	16.068	40.674	1.33991	0	0	XP_002886780.1	CYP89A5	0	others
Bra008512	74.4558	19.7474	-1.91472	9.9873e-100	1.3939e-98	NP_564842.1	ribosomal protein S5 family protein	0	translation regulation
Bra008517	209.296	103.167	-1.02057	1.12471e-103	1.60409e-102	BAF00589.1	hypothetical protein	0	unkown funciton
Bra008540	39.0584	11.5105	-1.76268	4.41684e-46	3.77726e-45	CAM31954.1	glucosyltransferase	0	others
Bra008557	27.3019	5.69917	-2.26018	1.75703e-48	1.55121e-47	XP_002874934.1	hypothetical protein ARALYDRAFT_912011	0	unkown funciton
Bra008561	112.287	16.8798	-2.73382	5.70848e-214	1.21526e-212	XP_002871761.1	hypothetical protein ARALYDRAFT_488599	0	unkown funciton
Bra008580	19.9479	3.84889	-2.37372	1.10068e-78	1.31987e-77	XP_002871746.1	hypothetical protein ARALYDRAFT_909689	0	unkown funciton
Bra008583	114.461	7.07919	-4.01513	0	0	XP_002871742.1	hypothetical protein ARALYDRAFT_488554	0	unkown funciton
Bra008589	11.9371	26.9648	1.17563	2.36998e-11	7.9874e-11	NP_197186.1	BPA1 (BINDINGPARTNEROFACD11 1); nucleic acid binding / nucleotide binding / oxidoreductase	6.17885e-110	oxidation reduction
Bra008595	43.3899	8.29217	-2.38754	2.02236e-123	3.23709e-122	XP_002873791.1	hypothetical protein ARALYDRAFT_488536	0	unkown funciton
Bra008597	22.2755	10.9974	-1.01829	5.87922e-11	1.94028e-10	NP_197178.1	inositol 1,3,4-trisphosphate 5/6-kinase	1.31118e-156	kinase
Bra008600	40.9463	3.79501	-3.43156	2.00188e-168	3.8325e-167	NP_197175.1	unknown protein	0	unkown funciton
Bra008621	45.2805	99.7592	1.13956	0	0	NP_197151.1	zinc finger (C2H2 type) family protein	1.14792e-52	transcription regulation
Bra008625	24.6887	3.8976	-2.66319	2.41054e-104	3.45338e-103	XP_002871714.1	hypothetical protein ARALYDRAFT_488483	0	unkown funciton
Bra008629	24.2679	10.8348	-1.16337	4.0345e-17	2.03176e-16	XP_002871711.1	RNA recognition motif-containing protein	0	DNA or RNA binding
Bra008640	52.5549	12.5775	-2.06298	3.53504e-83	4.38556e-82	NP_568328.1	PGLCT (PLASTIDIC GLC TRANSLOCATOR); carbohydrate transmembrane transporter/ sugar:hydrogen symporter	0	transporter facilitation
Bra008652	38.5322	7.41831	-2.3769	1.00181e-72	1.13887e-71	XP_002884325.1	hypothetical protein ARALYDRAFT_477487	0	unkown funciton
Bra008654	110.505	47.2959	-1.22432	1.7312e-62	1.79023e-61	NP_197108.1	regulator of chromosome condensation (RCC1) family protein	0	DNA or RNA binding
Bra008658	47.1182	20.7439	-1.1836	2.47962e-38	1.88618e-37	XP_002888883.1	hypothetical protein ARALYDRAFT_476389	0	unkown funciton
Bra008662	268.62	80.0784	-1.74608	1.05086e-231	2.31269e-230	AAR15894.1	S-adenosyl-L-methionine decarboxylase	0	others
Bra008663	53.4374	14.2372	-1.90818	1.11048e-47	9.69143e-47	XP_002873749.1	hypothetical protein ARALYDRAFT_488438	4.27495e-173	unkown funciton
Bra008667	28.0546	73.7055	1.39353	1.22991e-12	4.56363e-12	AAP42646.1	putative beta-glucan elicitor receptor	0	cell wall
Bra008683	529.752	86.941	-2.60721	0	0	NP_197069.1	RGP2 (REVERSIBLY GLYCOSYLATED POLYPEPTIDE 2); transferase, transferring hexosyl groups	0	others
Bra008695	588.787	112.671	-2.38562	0	0	XP_002873728.1	hypothetical protein ARALYDRAFT_488394	0	unkown funciton
Bra008698	49.6674	6.9215	-2.84314	1.84164e-203	3.81383e-202	XP_002873724.1	APG6/CLPB-P/CLPB3	0	others
Bra008699	16.8071	35.0818	1.06165	2.10498e-13	8.76837e-13	NP_197045.1	DND1 (DEFENSE NO DEATH 1); calcium channel/ calmodulin binding / cation channel/ cyclic nucleotide binding / intracellular cAMP activated cation channel/ intracellular cyclic nucleotide activated cation channel/ inward rectifier potassium channel	0	small molecular
Bra008700	25.3084	6.51182	-1.95848	4.4481e-73	5.08197e-72	NP_568313.2	U-box domain-containing protein	0	others
Bra008720	6.85712	130.618	4.25161	3.66374e-14	1.66398e-13	AAP37696.1	At5g15120	1.76497e-125	unkown funciton
Bra008731	18.4132	7.55186	-1.28584	3.40298e-21	1.8958e-20	XP_002871638.1	senescence-associated gene 101	1.13229e-175	unkown funciton
Bra008737	98.6683	199.21	1.01363	4.68158e-12	1.64735e-11	XP_002871631.1	hypothetical protein ARALYDRAFT_488325	0	unkown funciton
Bra008742	44.3558	4.11273	-3.43095	3.69158e-140	6.35832e-139	AAL38867.1	putative protein kinase	0	kinase
Bra008757	44.2743	18.184	-1.2838	2.47178e-27	1.55991e-26	NP_196949.1	GDSL-motif lipase/hydrolase family protein	0	carbohydrate metabolism
Bra008768	10.4301	23.5606	1.17563	2.36998e-11	7.98655e-11	NP_001147134.1	transcription regulator	3.78476e-125	transcription regulation
Bra008794	29.9304	91.3899	1.61042	2.35812e-13	9.7239e-13	ABF85775.1	At5g13890	1.78142e-93	unkown funciton
Bra008801	32.3742	78.2418	1.27309	0	0	NP_196885.1	glutaredoxin family protein	1.421e-117	others
Bra008804	6.76248	26.5028	1.97052	4.4964e-13	1.77329e-12	XP_002871584.1	hypothetical protein ARALYDRAFT_488199	0	unkown funciton
Bra008811	22.4941	7.71758	-1.54332	2.50168e-31	1.69107e-30	XP_002871578.1	elongation factor family protein	0	translation regulation
Bra008812	35.3867	15.0296	-1.2354	9.1117e-35	6.55915e-34	XP_002871577.1	predicted protein	0	unkown funciton
Bra008830	43.8038	97.3339	1.15189	0	0	AAK48960.1	ubiquinol--cytochrome-c reductase-like protein	5.31186e-136	oxidation reduction
Bra008832	19.5632	5.53172	-1.82234	1.15281e-54	1.09725e-53	XP_002871567.1	hypothetical protein ARALYDRAFT_488158	0	unkown funciton
Bra008838	42.7244	5.18751	-3.04195	3.07892e-159	5.69306e-158	XP_002873607.1	hypothetical protein ARALYDRAFT_488148	0	unkown funciton
Bra008842	48.6244	19.4561	-1.32146	1.71376e-42	1.39535e-41	XP_002871557.1	hypothetical protein ARALYDRAFT_488142	0	unkown funciton
Bra008853	33.907	69.78	1.04123	6.4393e-14	2.85196e-13	XP_002873600.1	hypothetical protein ARALYDRAFT_488130	8.94485e-59	unkown funciton
Bra008855	17.9152	7.3813	-1.27924	1.81654e-17	9.23541e-17	XP_002871547.1	glucose-6-phosphate dehydrogenase 2	0	carbohydrate metabolism
Bra008874	42.6253	127.349	1.579	0	0	NP_196792.1	proline-rich family protein	4.47825e-12	universal stress related
Bra008876	63.2103	28.3517	-1.15673	1.747e-25	1.06484e-24	XP_002873582.1	hypothetical protein ARALYDRAFT_909232	1.30843e-162	unkown funciton
Bra008878	15.7776	44.0845	1.48239	0	0	XP_002873581.1	predicted protein	8.33698e-87	unkown funciton
Bra008879	23.8819	11.0878	-1.10694	1.27888e-16	6.34927e-16	NP_568281.1	CPK7 (calmodulin-domain protein kinase 7); ATP binding / calcium ion binding / calmodulin-dependent protein kinase/ kinase/ protein kinase/ protein serine/threonine kinase/ protein tyrosine kinase	0	kinase
Bra008887	48.8865	3.57065	-3.77518	1.38855e-162	2.60674e-161	XP_002873573.1	hypothetical protein ARALYDRAFT_325766	0	unkown funciton
Bra008893	19.1047	4.19352	-2.1877	1.51097e-52	1.40465e-51	AAL87123.1	AF479280_1 SEC10	0	unkown funciton
Bra008900	11.438	26.2323	1.19752	2.4452e-11	8.23743e-11	NP_568264.1	zinc finger (C3HC4-type RING finger) family protein	2.06167e-73	transcription regulation
Bra008903	664.63	284.789	-1.22266	0	0	BAJ34332.1	unnamed protein product	0	unkown funciton
Bra008911	52.9694	8.82882	-2.58487	3.7944e-168	7.25983e-167	XP_002873552.1	hypothetical protein ARALYDRAFT_488058	0	unkown funciton
Bra008924	18.0186	64.7565	1.84554	7.41628e-14	3.26204e-13	XP_002871507.1	hypothetical protein ARALYDRAFT_488037	2.45039e-113	unkown funciton
Bra008943	21.9542	4.63018	-2.24536	2.61746e-104	3.74645e-103	NP_001154709.1	glycine-rich protein	0	universal stress related
Bra008947	45.6209	14.4428	-1.65935	2.6536e-40	2.08251e-39	NP_196726.1	hydrolase, alpha/beta fold family protein	0	carbohydrate metabolism
Bra008953	60.4755	5.48971	-3.46155	0	0	NP_196717.3	catalytic	0	others
Bra008957	77.9577	34.2508	-1.18655	8.15432e-24	4.81227e-23	NP_196711.1	unknown protein	3.40078e-99	unkown funciton
Bra008976	22.3134	69.7766	1.64483	0	0	ABY83460.1	elongated hypocotyl 5 protein	9.34485e-51	universal stress related
Bra008981	140.832	49.1391	-1.51903	4.46448e-96	6.0795e-95	NP_568469.1	phosphate translocator-related	1.37921e-164	transporter facilitation
Bra008983	42.4788	19.4355	-1.12805	4.34066e-26	2.67846e-25	CAB96655.1	DEAD BOX RNA helicase RH15	0	DNA or RNA binding
Bra008991	6.74592	289.122	5.42152	2.36034e-13	9.73179e-13	NP_196670.1	serine-rich protein-related	1.76824e-74	universal stress related
Bra008993	127.671	542.533	2.08728	1.64491e-12	6.02095e-12	XP_002873495.1	hypothetical protein ARALYDRAFT_487939	2.52218e-56	unkown funciton
Bra008994	23.2855	4.62164	-2.33296	2.59954e-94	3.50258e-93	XP_002871450.1	hypothetical protein ARALYDRAFT_487936	0	unkown funciton
Bra009002	30.5061	6.08808	-2.32504	9.32162e-79	1.11905e-77	XP_002873486.1	hypothetical protein ARALYDRAFT_487925	0	unkown funciton
Bra009010	30.8118	62.1047	1.01122	1.54543e-13	6.57214e-13	XP_002873472.1	catalytic/ coenzyme binding protein	4.20483e-134	others
Bra009015	8.23076	17.9532	1.12514	1.68532e-13	7.1168e-13	NP_196626.2	zinc finger (C3HC4-type RING finger) family protein	5.94024e-171	transcription regulation
Bra009028	18.7391	7.35122	-1.35	1.68074e-21	9.42091e-21	XP_002873462.1	hypothetical protein ARALYDRAFT_909005	0	unkown funciton
Bra009038	8.16824	3.04552	-1.42334	1.00103e-26	6.24945e-26	AAZ66938.1	117M18_19	0	unkown funciton
Bra009040	85.4939	172.76	1.01487	1.64491e-12	6.02164e-12	AAZ67615.1	hypothetical protein	1.25452e-123	unkown funciton
Bra009051	23.2117	8.17341	-1.50584	2.55106e-29	1.66967e-28	AAZ67602.1	80A08_17	0	unkown funciton
Bra009057	123.879	37.6734	-1.71732	1.33999e-106	1.95567e-105	AAZ67593.1	80A08_8	0	unkown funciton
Bra009071	21.2561	42.8604	1.01177	1.3034e-12	4.81731e-12	ABD38888.1	At5g09960	9.05822e-46	unkown funciton
Bra009086	87.5993	34.4575	-1.3461	6.14222e-30	4.06507e-29	NP_568148.1	UBC22 (ubiquitin-conjugating enzyme 22); ubiquitin-protein ligase	2.97978e-83	protein degradation
Bra009091	38.3127	4.90294	-2.9661	7.03282e-106	1.01942e-104	Q9FHK7.1	Y5516_ARATH RecName: Full=Probable leucine-rich repeat receptor-like protein kinase At5g05160; Flags: Precursor	0	kinase
Bra009097	16.7606	40.6234	1.27724	0	0	XP_002871146.1	hypothetical protein ARALYDRAFT_487314	1.75729e-138	unkown funciton
Bra009106	6.62663	17.6111	1.41014	0	0	XP_002871151.1	hypothetical protein ARALYDRAFT_487328	0	unkown funciton
Bra009108	334.856	42.0425	-2.99362	3.48568e-150	6.2114e-149	NP_001078533.1	metal ion binding	7.06777e-34	transporter facilitation
Bra009112	11.4679	36.7667	1.6808	6.0174e-14	2.67549e-13	AAS58438.1	DREB2A	3.39811e-77	protein degradation
Bra009113	16.5674	51.4637	1.63521	0	0	Q9FLB1.1	RecName: Full=Abscisic acid receptor PYL5	3.49565e-111	signal transduction
Bra009120	12.0294	4.01985	-1.58135	3.7807e-28	2.41942e-27	NP_196176.1	transducin family protein / WD-40 repeat family protein	0	small molecular
Bra009123	19.6942	4.60542	-2.09637	4.61862e-53	4.31752e-52	XP_002873216.1	transcription factor	0	transcription regulation
Bra009125	23.2396	3.23072	-2.84666	1.37846e-80	1.67753e-79	XP_002871176.1	hypothetical protein ARALYDRAFT_487368	0	unkown funciton
Bra009134	26.7501	104.514	1.96608	3.4106e-13	1.36514e-12	NP_196198.1	myb family transcription factor	9.27524e-125	transcription regulation
Bra009150	29.1592	12.2194	-1.25478	4.82578e-17	2.42336e-16	Q6RJS2.1	DHYS_BRANA RecName: Full=Deoxyhypusine synthase	0	translation regulation
Bra009154	171.243	66.8803	-1.35639	1.50027e-21	8.41379e-21	NP_568160.1	protease inhibitor/seed storage/lipid transfer protein (LTP) family protein	3.2242e-31	protein degradation
Bra009172	51.0901	15.5901	-1.71241	1.08496e-50	9.83979e-50	NP_196244.1	nucleolar protein-related	0	others
Bra009190	45.3033	219.837	2.27875	1.37579e-12	5.0772e-12	NP_196257.2	FLA17 (FASCICLIN-LIKE ARABINOGALACTAN PROTEIN 17 PRECURSOR)	0	others
Bra009196	46.0329	12.974	-1.82704	1.83486e-114	2.79678e-113	NP_568168.1	ATUBA2; ubiquitin activating enzyme/ ubiquitin-protein ligase	0	protein degradation
Bra009208	25.1798	9.84772	-1.3544	9.5344e-25	5.71438e-24	XP_002873268.1	FAD linked oxidase family protein	0	oxidation reduction
Bra009210	27.5813	2.26634	-3.60525	5.83672e-159	1.07736e-157	BAJ34172.1	unnamed protein product	0	unkown funciton
Bra009221	609.286	1565.82	1.36173	0	0	AAR15704.3	peroxidase	3.99857e-151	oxidation reduction
Bra009235	63.6409	201.763	1.66463	2.73114e-14	1.25037e-13	ABX46562.1	polygalacturonase inhibitor protein 16	7.50331e-173	cell wall
Bra009237	99.7645	25.5902	-1.96293	5.8114e-93	7.73553e-92	ABX46555.1	polygalacturonase inhibitor protein 9	8.09188e-175	cell wall
Bra009260	123.441	356.248	1.52906	1.09313e-12	4.08505e-12	AAR13690.1	peptide methionine sulfoxide reductase	1.58363e-116	oxidation reduction
Bra009268	51.8551	125.471	1.2748	2.91544e-13	1.18251e-12	AAM64773.1	putative inositol hexaphosphate kinase	2.15861e-143	kinase
Bra009274	19.843	8.64654	-1.19844	3.6781e-25	2.22659e-24	NP_196346.1	AML4 (ARABIDOPSIS MEI2-LIKE 4); RNA binding / nucleic acid binding / nucleotide binding	0	DNA or RNA binding
Bra009283	56.1542	184.201	1.71382	3.33066e-13	1.33582e-12	NP_196339.1	ATBAG3 (ARABIDOPSIS THALIANA BCL-2-ASSOCIATED ATHANOGENE 3); protein binding	1.49414e-124	protein degradation
Bra009298	328.085	41.6869	-2.9764	0	0	NP_196320.2	aspartic-type endopeptidase	0	protein degradation
Bra009302	33.3134	94.2757	1.50078	2.04504e-13	8.53093e-13	BAJ33600.1	unnamed protein product	2.29297e-119	unkown funciton
Bra009303	47.7615	4.02026	-3.57049	2.92382e-266	6.77058e-265	XP_002873288.1	hypothetical protein ARALYDRAFT_487516	0	unkown funciton
Bra009310	35.5695	7.52839	-2.24023	2.60978e-55	2.5034e-54	NP_196400.2	AtGUS2 (Arabidopsis thaliana glucuronidase 2); beta-glucuronidase	0	others
Bra009313	61.6366	27.54	-1.16226	2.40824e-18	1.25391e-17	AAM64809.1	unknown	8.3167e-66	unkown funciton
Bra009317	106.319	217.879	1.03513	1.35914e-12	5.02039e-12	AAM64394.1	unknown	5.7399e-52	unkown funciton
Bra009322	32.79	4.90873	-2.73983	2.68506e-73	3.07209e-72	XP_002873342.1	hypothetical protein ARALYDRAFT_908762	0	unkown funciton
Bra009328	24.4388	65.5332	1.42305	0	0	NP_568190.1	NF-YB12 (NUCLEAR FACTOR Y, SUBUNIT B12); DNA binding /transcription factor	5.86963e-56	transcription regulation
Bra009346	9.96496	20.6268	1.04958	1.69578e-08	4.89793e-08	BAJ34067.1	unnamed protein product	2.45405e-121	unkown funciton
Bra009350	13.7146	5.9894	-1.19523	5.02816e-18	2.59603e-17	XP_002873370.1	increased level of polyploidy1-1D	0	others
Bra009354	67.62	32.6847	-1.04884	7.99238e-29	5.1853e-28	NP_196476.1	SNRK2.1 (SNF1-RELATED PROTEIN KINASE 2.1); kinase/ protein kinase	2.21772e-168	kinase
Bra009360	97.7793	44.0133	-1.15159	9.9486e-70	1.09927e-68	XP_002871355.1	hypothetical protein ARALYDRAFT_487710	0	unkown funciton
Bra009363	63.754	25.5099	-1.32146	8.88038e-57	8.65885e-56	NP_568203.2	ATP binding / hydrogen ion transporting ATP synthase, rotational mechanism	0	Energy
Bra009366	47.0971	11.4018	-2.04638	1.25848e-72	1.42913e-71	XP_002873381.1	hypothetical protein ARALYDRAFT_908854	0	unkown funciton
Bra009370	27.9267	279.603	3.32366	6.83898e-14	3.02311e-13	AAP35049.1	NAC-domain protein 3	1.94974e-157	transcription regulation
Bra009379	123.069	23.187	-2.40808	8.94314e-197	1.8248e-195	XP_002873395.1	hypothetical protein ARALYDRAFT_487745	5.73876e-148	unkown funciton
Bra009382	13.9304	5.99317	-1.21685	7.45426e-21	4.12757e-20	AAM10969.1	calmodulin-binding transcription activator	0	transcription regulation
Bra009384	29.4024	140.73	2.25893	1.46549e-14	6.80198e-14	XP_002871372.1	hypothetical protein ARALYDRAFT_487757	1.45673e-137	unkown funciton
Bra009385	110.136	13.174	-3.06351	2.08798e-159	3.86524e-158	XP_002873401.1	transcription factor/ transcription regulator	1.0374e-83	transcription regulation
Bra009393	84.4196	443.015	2.39171	4.26658e-12	1.50713e-11	NP_196524.1	octicosapeptide/Phox/Bem1p (PB1) domain-containing protein	7.45759e-138	signal transduction
Bra009404	155.99	59.4208	-1.39241	1.88725e-161	3.53256e-160	NP_568147.1	clathrin adaptor complexes medium subunit-related	0	others
Bra009410	15.2423	4.73149	-1.68771	7.04132e-39	5.40116e-38	XP_002871124.1	hypothetical protein ARALYDRAFT_908384	0	unkown funciton
Bra009420	31.7223	11.4617	-1.46868	7.92608e-36	5.80513e-35	ABE73345.1	putative calcium-dependent protein kinase 2	0	kinase
Bra009434	15.2192	33.3713	1.13271	5.60218e-13	2.1766e-12	XP_002871110.1	hypothetical protein ARALYDRAFT_487251	0	unkown funciton
Bra009450	31.1998	4.49957	-2.79368	9.08622e-135	1.536e-133	AAK96544.1	AT5g04480/T32M21_80	0	unkown funciton
Bra009464	30.5345	297.831	3.28598	4.4964e-13	1.77373e-12	ABI74691.1	C2H2 zinc finger protein	3.27972e-74	transcription regulation
Bra009470	16.322	3.88429	-2.0711	5.9309e-75	6.8645e-74	NP_196049.1	KTF1 (KOW DOMAIN-CONTAINING TRANSCRIPTION FACTOR 1); nucleotide binding	0	transcription regulation
Bra009487	226.594	3108.77	3.77817	2.37588e-14	1.09148e-13	AAR24695.1	At5g04080	1.02321e-24	unkown funciton
Bra009489	24.7318	4.43678	-2.47878	2.15752e-54	2.04804e-53	NP_196026.1	dehydration-responsive protein-related	0	universal stress related
Bra009491	4.16298	17.1605	2.0434	2.5513e-13	1.04369e-12	NP_196024.1	SDP1 (SUGAR-DEPENDENT1); triacylglycerol lipase	0	carbohydrate metabolism
Bra009512	53.7074	10.9235	-2.29768	3.77806e-96	5.15136e-95	BAJ34228.1	unnamed protein product	0	unkown funciton
Bra009521	56.1429	17.9832	-1.64246	9.0476e-104	1.29212e-102	XP_002871050.1	1, 4-alpha-glucan branching enzyme protein soform SBE2.2 precursor	0	carbohydrate metabolism
Bra009523	59.0014	12.0573	-2.29084	1.20935e-125	1.95634e-124	ACV92697.1	exocyst subunit EXO70 A1	0	transcription regulation
Bra009539	52.7302	10.2434	-2.36394	1.43095e-237	3.17103e-236	BAJ33707.1	unnamed protein product	0	unkown funciton
Bra009542	260.447	907.361	1.80069	4.58034e-12	1.6135e-11	XP_002874006.1	hypothetical protein ARALYDRAFT_488966	1.19352e-124	unkown funciton
Bra009543	123.191	652.191	2.40439	0	0	XP_002871018.1	hypothetical protein ARALYDRAFT_908188	1.12142e-58	unkown funciton
Bra009548	71.7924	16.4274	-2.12773	2.2789e-106	3.31536e-105	XP_002871016.1	DNAJ heat shock N-terminal domain-containing protein	0	universal stress related
Bra009551	15.3389	54.7685	1.83615	8.12684e-14	3.56427e-13	XP_002871010.1	hypothetical protein ARALYDRAFT_908173	5.82961e-100	unkown funciton
Bra009554	36.5221	12.9845	-1.49198	9.55546e-34	6.75525e-33	NP_568110.2	iqd2 (IQ-domain 2); calmodulin binding	6.23015e-153	signal transduction
Bra009564	52.7002	18.1213	-1.54012	7.70354e-46	6.56518e-45	NP_195902.1	RHL2 (ROOT HAIRLESS 2); ATP binding / DNA binding / DNA topoisomerase (ATP-hydrolyzing)/ identical protein binding / protein binding	0	transcription regulation
Bra009565	54.9757	6.70614	-3.03524	3.85212e-174	7.4778e-173	ADA58346.1	pseudo-response regulator 7b	0	transcription regulation
Bra009575	33.6813	81.2987	1.27129	2.12052e-13	8.81471e-13	XP_002873064.1	hypothetical protein ARALYDRAFT_487043	5.05326e-59	unkown funciton
Bra009576	79.6213	35.5682	-1.16257	2.67068e-55	2.56105e-54	BAE98405.1	ankyrin like protein	0	others
Bra009582	37.889	18.8154	-1.00986	6.57996e-24	3.88747e-23	XP_002887861.1	hypothetical protein ARALYDRAFT_477298	0	unkown funciton
Bra009583	307.555	56.4082	-2.44687	0	0	AAB88009.1	heat shock cognate protein HSC70	0	universal stress related
Bra009584	97.1611	15.0925	-2.68655	2.37752e-213	5.05132e-212	AAS09825.1	heat shock cognate protein 70	0	universal stress related
Bra009598	21.7287	4.14397	-2.39051	8.46174e-151	1.51293e-149	NP_195851.2	PRT6 (PROTEOLYSIS 6); ubiquitin-protein ligase	0	protein degradation
Bra009607	19.7695	199.022	3.33158	4.10782e-14	1.85748e-13	XP_002870961.1	hypothetical protein ARALYDRAFT_486997	8.51546e-33	unkown funciton
Bra009626	32.1025	5.19379	-2.62783	1.02851e-81	1.26272e-80	XP_002870942.1	hypothetical protein ARALYDRAFT_486969	0	unkown funciton
Bra009655	10.6073	26.6871	1.33109	5.61772e-14	2.50651e-13	XP_002884046.1	homoserine kinase	4.52261e-169	kinase
Bra009656	23.7837	67.7072	1.50934	2.93098e-14	1.34033e-13	AAK55734.1	hypothetical protein	4.1961e-27	unkown funciton
Bra009678	19.6937	5.78176	-1.76815	3.38706e-36	2.49042e-35	AAL90894.1	AT5g23390/T32G24_2	0	unkown funciton
Bra009683	20.7052	5.40566	-1.93745	8.26668e-52	7.62287e-51	XP_002874130.1	transducin family protein	0	small molecular
Bra009686	45.9777	12.2871	-1.90379	1.45616e-93	1.94966e-92	XP_002874132.1	ATLCBK1	0	others
Bra009695	153.658	11.0342	-3.79966	0	0	BAJ34214.1	unnamed protein product	0	unkown funciton
Bra009696	196.06	24.2306	-3.01639	0	0	AAL36035.1	AT5g08500/MAH20_6	0	unkown funciton
Bra009704	44.2743	129.645	1.55003	0	0	NP_197760.1	DNA binding / DNA-directed RNA polymerase	1.67523e-81	transcription regulation
Bra009709	77.4059	38.5394	-1.00611	1.35566e-43	1.1166e-42	AAT41837.1	At5g23850	0	unkown funciton
Bra009710	197.373	81.0346	-1.28431	1.03035e-133	1.73261e-132	NP_568437.1	TUB8; structural constituent of cytoskeleton	0	cytoskeleton
Bra009712	47.4388	3.25364	-3.86594	1.45132e-193	2.94628e-192	XP_002872080.1	CPSF100	0	others
Bra009713	46.6191	2.86211	-4.02577	1.79189e-246	4.02678e-245	XP_002872081.1	hypothetical protein ARALYDRAFT_489250	0	unkown funciton
Bra009723	19.8968	67.5404	1.76322	8.12684e-14	3.56182e-13	ACG70180.1	chloroplast MinD	1.55424e-89	others
Bra009739	58.0538	258.678	2.15569	0	0	AAO44003.1	At5g24165	6.46544e-19	unkown funciton
Bra009745	36.6031	10.0138	-1.86998	8.0159e-151	1.43402e-149	NP_197816.2	unknown protein	0	unkown funciton
Bra009747	55.7676	7.98983	-2.80319	3.44556e-151	6.17783e-150	XP_002872103.1	hypothetical protein ARALYDRAFT_489289	0	unkown funciton
Bra009750	20.108	48.2533	1.26286	1.74971e-13	7.37021e-13	BAD95132.1	hypothetical protein	2.8072e-62	unkown funciton
Bra009768	58.852	252.412	2.10062	1.28586e-12	4.75743e-12	ADA58345.1	pseudo-response regulator 5b	0	transcription regulation
Bra009774	102.771	38.6882	-1.40946	6.87188e-82	8.44974e-81	XP_002874210.1	tip	2.10392e-166	unkown funciton
Bra009785	51.3276	11.3334	-2.17916	4.1823e-82	5.15252e-81	XP_002885669.1	hypothetical protein ARALYDRAFT_319176	1.12778e-131	unkown funciton
Bra009790	47.7987	7.61759	-2.64956	2.23514e-245	5.01227e-244	NP_197859.4	unknown protein	0	unkown funciton
Bra009794	31.7454	2.2884	-3.79414	1.97629e-178	3.88123e-177	XP_002874225.1	ABC1 family protein	0	transcription regulation
Bra009800	9.23571	40.6874	2.13929	6.0174e-14	2.67028e-13	XP_002874229.1	zinc finger family protein	6.31369e-42	transcription regulation
Bra009829	32.6568	639.806	4.29218	7.68274e-13	2.9262e-12	XP_002872151.1	hypothetical protein ARALYDRAFT_489379	7.86973e-74	unkown funciton
Bra009835	33.3964	137.934	2.04621	1.09668e-12	4.09737e-12	NP_197917.1	EBF2 (EIN3-BINDING F BOX PROTEIN 2); protein binding	0	unkown funciton
Bra009841	16.1315	44.8468	1.47512	2.5513e-13	1.04383e-12	XP_002872166.1	hypothetical protein ARALYDRAFT_910605	0	unkown funciton
Bra009849	43.3027	89.0619	1.04035	0	0	XP_002874268.1	hypothetical protein ARALYDRAFT_910614	2.55588e-44	unkown funciton
Bra009858	139.87	45.28	-1.62714	5.70894e-156	1.03995e-154	XP_002872179.1	hypothetical protein ARALYDRAFT_489426	0	unkown funciton
Bra009887	29.6298	69.5073	1.23012	5.89972e-13	2.28165e-12	XP_002874304.1	hypothetical protein ARALYDRAFT_910695	8.62177e-88	unkown funciton
Bra009891	20.5146	9.43976	-1.11983	3.47016e-21	1.93289e-20	NP_197996.1	CLC-D (CHLORIDE CHANNEL D); anion channel/ voltage-gated chloride channel	0	transporter facilitation
Bra009915	38.3154	152.338	1.99128	1.13509e-12	4.23346e-12	NP_850886.1	catalytic/ pyridoxal phosphate binding	0	others
Bra009922	115.988	22.7101	-2.35257	2.15798e-284	5.12729e-283	XP_002872240.1	AT5g26830/F2P16_90	0	unkown funciton
Bra009941	29.2539	287.145	3.29507	2.49356e-13	1.02177e-12	XP_002872257.1	hypothetical protein ARALYDRAFT_489548	0	unkown funciton
Bra009944	67.9674	195.865	1.52694	0	0	XP_002874347.1	hypoxia-responsive family protein	1.25905e-35	universal stress related
Bra009947	278.871	753.689	1.43437	0	0	NP_198122.4	structural constituent of ribosome	1.44932e-39	translation regulation
Bra009952	21.3946	6.36626	-1.74873	7.00816e-35	5.05972e-34	XP_002874365.1	EMB2473	0	unkown funciton
Bra009970	22.4364	52.8857	1.23704	5.89972e-13	2.28414e-12	XP_002874383.1	ATGID1C/GID1C	0	others
Bra009976	23.7087	9.69979	-1.28939	1.84877e-44	1.54223e-43	XP_002884488.1	hypothetical protein ARALYDRAFT_477786	0	unkown funciton
Bra009978	113.048	10.4152	-3.44017	1e-304	2.43577e-303	O04658.2	Probable nucleolar protein 5-1;	4.21183e-157	others
Bra009987	64.2927	250.654	1.96297	0	0	AAL67435.1	deoxycytidine deaminase	2.26901e-92	secondary metabolism
Bra009999	24.5616	242.706	3.30473	0	0	XP_002884453.1	hypothetical protein ARALYDRAFT_477717	1.88482e-66	unkown funciton
Bra010012	61.7405	18.8425	-1.71223	5.8526e-77	6.89381e-76	XP_002872330.1	calcium-binding EF hand family protein	0	small molecular
Bra010025	22.7114	8.54331	-1.41055	2.24728e-27	1.42019e-26	NP_199769.1	DNAJ heat shock N-terminal domain-containing protein	0	universal stress related
Bra010037	23.2589	74.4663	1.6788	3.18634e-13	1.28553e-12	XP_002863980.1	hypothetical protein ARALYDRAFT_494997	5.01163e-52	unkown funciton
Bra010043	16.4447	52.1145	1.66406	7.10542e-14	3.13654e-13	NP_200998.1	unknown protein	7.02778e-78	unkown funciton
Bra010044	30.7191	4.86933	-2.65734	3.32386e-111	4.99251e-110	NP_568946.1	AML1 (ARABIDOPSIS MEI2-LIKE PROTEIN 1); RNA binding / protein binding	0	DNA or RNA binding
Bra010045	30.4714	10.9079	-1.48208	1.05338e-35	7.69915e-35	XP_002864762.1	hypothetical protein ARALYDRAFT_496370	0	unkown funciton
Bra010048	101.566	18.4456	-2.46107	0	0	CAG30068.1	putative auxin response factor	0	signal transduction
Bra010049	13.658	38.4306	1.49251	0	0	NP_201008.2	AT-HSFB2A; DNA binding transcription factor	9.17205e-103	transcription regulation
Bra010053	33.0286	10.9441	-1.59357	3.53294e-35	2.56228e-34	XP_002866467.1	hypothetical protein ARALYDRAFT_496379	8.04978e-167	unkown funciton
Bra010055	63.4778	14.8796	-2.09292	1.32786e-77	1.57454e-76	XP_002866468.1	hypothetical protein ARALYDRAFT_496381	9.12092e-94	unkown funciton
Bra010071	51.4936	25.594	-1.00859	2.05358e-21	1.14906e-20	NP_201033.2	unknown protein	1.68329e-179	unkown funciton
Bra010075	2759.79	238.1	-3.53492	0	0	XP_002864786.1	hypothetical protein ARALYDRAFT_496412	9.26333e-88	unkown funciton
Bra010096	34.6303	150.01	2.11496	3.08864e-13	1.24848e-12	NP_201058.1	SRO5 (SIMILAR TO RCD ONE 5); NAD+ ADP-ribosyltransferase	1.39152e-133	others
Bra010097	128.328	62.0696	-1.04788	1.16612e-77	1.38327e-76	BAJ34440.1	unnamed protein product	0	unkown funciton
Bra010099	72.6739	20.2907	-1.84062	1.31939e-93	1.76728e-92	BAH30647.1	hypothetical protein	0	unkown funciton
Bra010100	77.3686	16.3502	-2.24244	9.6732e-146	1.69909e-144	XP_002864803.1	predicted protein	0	unkown funciton
Bra010102	40.3301	14.0549	-1.52078	2.0722e-39	1.60144e-38	XP_002864804.1	galactosyltransferase family protein	0	others
Bra010106	48.3213	22.9604	-1.07351	2.27358e-39	1.7558e-38	XP_002866503.1	hypothetical protein ARALYDRAFT_496445	0	unkown funciton
Bra010111	293.645	21.9952	-3.73881	0	0	NP_201074.1	proton-dependent oligopeptide transport (POT) family protein	0	transporter facilitation
Bra010114	102.011	44.4557	-1.19829	3.3664e-63	3.5016e-62	XP_002877519.1	tubulin beta-2	0	cytoskeleton
Bra010129	227.145	53.7963	-2.07804	0	0	Q27GI3.2	NAT6_ARATH RecName: Full=Nucleobase-ascorbate transporter 6; Short=AtNAT6	0	transporter facilitation
Bra010131	11.3418	38.0725	1.7471	8.12684e-14	3.56378e-13	XP_002864826.1	protein binding protein	2.30881e-101	unkown funciton
Bra010162	93.4699	198.713	1.08811	0	0	NP_564399.1	TOM2A (TOBAMOVIRUS MULTIPLICATION 2A); protein binding	3.28694e-104	unkown funciton
Bra010168	15.9772	2.8067	-2.50906	1.25103e-62	1.29579e-61	NP_174527.2	ESP3 (ENHANCED SILENCING PHENOTYPE 3); ATP binding / ATP-dependent RNA helicase/ ATP-dependent helicase/ helicase/ nucleic acid binding	0	DNA or RNA binding
Bra010178	217.781	51.7157	-2.07421	0	0	ABS11038.1	MYC	0	transcription regulation
Bra010189	105.362	22.4555	-2.23022	1.94455e-247	4.38526e-246	XP_002893746.1	hypothetical protein ARALYDRAFT_473472	0	unkown funciton
Bra010194	27.8918	750.165	4.7493	0	0	NP_192765.1	wound-responsive family protein	2.89548e-27	universal stress related
Bra010207	68.484	32.8821	-1.05846	1.24376e-34	8.93923e-34	XP_002893773.1	hypothetical protein ARALYDRAFT_890931	1.16365e-174	unkown funciton
Bra010232	8.34167	18.6437	1.16028	9.992e-15	4.67235e-14	NP_194882.2	ATEXO70G1 (exocyst subunit EXO70 family protein G1); protein binding	0	unkown funciton
Bra010234	86.8243	7.10383	-3.61143	0	0	Q9SV21.2	Full=Coatomer subunit beta-1; AltName: Full=Beta-coat protein 1; Short=Beta-COP 1	1.86137e-174	others
Bra010248	12.6231	1.7685	-2.83546	8.90772e-102	1.25807e-100	XP_002869342.1	transducin family protein	0	small molecular
Bra010263	89.5102	1349.08	3.91378	6.87828e-12	2.38562e-11	NP_194825.1	SIP3 (SOS3-INTERACTING PROTEIN 3); ATP binding / kinase/ protein kinase/ protein serine/threonine kinase	0	kinase
Bra010283	19.2165	41.8577	1.12315	0	0	AAK95253.1	unknown protein	7.13175e-121	unkown funciton
Bra010292	77.5817	256.081	1.72281	1.05671e-12	3.95452e-12	BAJ33741.1	unnamed protein product	1.26535e-114	unkown funciton
Bra010309	14.9787	38.8087	1.37347	0	0	XP_002867378.1	hypothetical protein ARALYDRAFT_491758	3.45997e-85	unkown funciton
Bra010315	34.509	11.8179	-1.546	3.11202e-37	2.32241e-36	AAB04607.1	threonine synthase	0	Nitrogen metabolism
Bra010332	157.513	795.931	2.33717	2.79576e-12	1.00277e-11	XP_002867417.1	predicted protein	2.90355e-91	unkown funciton
Bra010355	37.311	14.9964	-1.31499	1.72901e-24	1.03201e-23	BAJ34056.1	unnamed protein product	7.35452e-149	unkown funciton
Bra010361	40.6358	15.2623	-1.41278	4.1557e-35	3.00848e-34	AAM61183.1	protein kinase ADK1-like protein	0	kinase
Bra010383	7.10935	105.253	3.88799	1.90958e-14	8.81833e-14	Q9M0J3.1	RecName: Full=Ethylene-responsive transcription factor ERF054; AltName: Full=Transcription factor QRAP2	6.70959e-110	transcription regulation
Bra010401	96.0759	24.9314	-1.94621	1.71297e-194	3.48854e-193	XP_002869559.1	hypothetical protein ARALYDRAFT_328945	8.92117e-163	unkown funciton
Bra010404	16.8286	3390.3	7.65435	0	0	AAK53036.1	unnamed protein product	1.38219e-140	unkown funciton
Bra010413	44.5017	8.00895	-2.47418	1.27269e-78	1.52498e-77	NP_567765.2	thioredoxin family protein	0	others
Bra010431	27.3904	13.2291	-1.04996	7.91434e-18	4.0599e-17	BAJ34003.1	unnamed protein product	0	unkown funciton
Bra010447	73.0389	153.687	1.07326	8.22232e-13	3.11981e-12	XP_002869656.1	hypothetical protein ARALYDRAFT_492242	2.59006e-96	unkown funciton
Bra010454	18.2659	4.78335	-1.93306	1.64952e-51	1.51319e-50	XP_002869662.1	hypothetical protein ARALYDRAFT_329104	0	unkown funciton
Bra010478	40.2924	98.9563	1.29629	8.9262e-14	3.89719e-13	BAJ33991.1	unnamed protein product	1.47413e-52	unkown funciton
Bra010483	38.5681	84.8904	1.13819	0	0	XP_002867645.1	RNA-binding protein cp31	9.04225e-132	DNA or RNA binding
Bra010489	52.4918	12.0529	-2.12271	3.93352e-73	4.49567e-72	XP_002869712.1	clathrin adaptor complexes medium subunit family protein	0	others
Bra010490	31.2078	89.598	1.52156	1.88516e-13	7.91048e-13	NP_194175.1	transcription initiation factor IIA gamma chain/TFIIA-gamma (TFIIA-S)	7.86876e-54	transcription regulation
Bra010499	290.076	120.804	-1.26376	4.18638e-166	7.9479e-165	XP_002869731.1	hypothetical protein ARALYDRAFT_914168	0	unkown funciton
Bra010506	32.561	7.55661	-2.10733	2.00104e-50	1.8071e-49	XP_002869052.1	La domain-containing protein	3.85572e-132	others
Bra010508	152.766	16.1178	-3.24459	0	0	NP_195308.1	cytoplasmic / citrate hydro-lyase / aconitase (ACO)	1.18167e-133	carbohydrate metabolism
Bra010510	73.3763	5.73288	-3.67798	0	0	XP_002867052.1	hypothetical protein ARALYDRAFT_491060	0	unkown funciton
Bra010519	39.5067	375.872	3.25007	0	0	NP_195300.1	Rho-GTPase-activating protein-related	2.30272e-91	small molecular
Bra010548	15.9277	52.457	1.7196	0	0	NP_567693.1	Dof-type zinc finger domain-containing protein	1.04623e-111	transcription regulation
Bra010569	81.096	19.8768	-2.02855	4.15528e-129	6.85031e-128	XP_002866997.1	hypothetical protein ARALYDRAFT_490965	0	unkown funciton
Bra010599	41.2317	16.7245	-1.30179	1.13936e-31	7.77252e-31	XP_002868986.1	hypothetical protein ARALYDRAFT_490875	5.97653e-135	unkown funciton
Bra010620	99.5332	21.8558	-2.18716	3.99978e-211	8.45861e-210	XP_002866924.1	mthsc70-1	0	others
Bra010652	24.6992	6.53285	-1.91868	4.9523e-95	6.71515e-94	XP_002866888.1	peroxisomal abc transporter	0	transporter facilitation
Bra010653	127.634	41.5237	-1.62	4.38912e-121	6.92821e-120	NP_195694.1	unknown protein	1.2591e-115	unkown funciton
Bra010665	609.394	2518.97	2.04738	0	0	AAK01359.1	dehydration stress-induced protein	8.03646e-97	universal stress related
Bra010667	36.5647	7.71739	-2.24427	6.91344e-79	8.30888e-78	AAK32823.1	AF361810_1 AT4g39690/T19P19_80	0	unkown funciton
Bra010674	61.5848	10.1297	-2.60398	5.18032e-288	1.23542e-286	XP_002888041.1	hypothetical protein ARALYDRAFT_475134	0	unkown funciton
Bra010684	33.034	2.49618	-3.72616	5.07664e-208	1.06373e-206	XP_002866847.1	hypothetical protein ARALYDRAFT_912402	0	unkown funciton
Bra010689	19.2368	4.61367	-2.05988	5.44854e-47	4.71641e-46	XP_002866844.1	predicted protein	0	unkown funciton
Bra010694	40.2706	117.587	1.54592	3.39062e-13	1.35782e-12	CAB43638.1	NAD(P)H oxidoreductase, isoflavone reductase-like protein	1.94373e-156	oxidation reduction
Bra010700	141.042	23.055	-2.61298	0	0	NP_568054.1	SEC14 cytosolic factor, putative / phosphoglyceride transfer protein, putative	0	others
Bra010702	11.4437	30.3473	1.40701	1.32783e-13	5.6846e-13	XP_002868889.1	protein binding protein	1.24151e-162	unkown funciton
Bra010712	67.1048	13.1862	-2.34738	8.22028e-188	1.64886e-186	NP_568051.1	VHA-A3 (VACUOLAR PROTON ATPASE A3); ATPase	0	Energy
Bra010720	20.6569	78.3686	1.92365	7.21644e-14	3.18247e-13	XP_002880369.1	ATBPC4	6.22927e-98	transcription regulation
Bra010724	21.2978	8.21755	-1.37393	5.92446e-32	4.0624e-31	XP_002862832.1	hypothetical protein ARALYDRAFT_359344	1.16916e-28	unkown funciton
Bra010728	50.6469	281.888	2.47658	1.46549e-14	6.80099e-14	XP_002868859.1	hypothetical protein ARALYDRAFT_490638	2.48499e-84	unkown funciton
Bra010731	16.7306	52.4217	1.64767	2.72448e-13	1.11126e-12	NP_195581.1	1-phosphatidylinositol phosphodiesterase-related	8.54109e-179	secondary metabolism
Bra010734	19.8679	42.1638	1.08556	6.03518e-13	2.33178e-12	NP_568045.1	choline transporter-related	0	transporter facilitation
Bra010737	64.5899	8.48179	-2.92887	0	0	XP_002868849.1	hypothetical protein ARALYDRAFT_912310	0	unkown funciton
Bra010738	851.95	395.691	-1.10639	3.83756e-156	6.99856e-155	NP_195570.1	ATFP6 (FARNESYLATED PROTEIN 6); metal ion binding	1.67996e-82	transporter facilitation
Bra010740	8.5915	21.4751	1.32168	3.08642e-14	1.40959e-13	CAB37511.1	Phospholipase like protein	0	lipid metabolism
Bra010744	14.5188	41.0307	1.49878	0	0	NP_568041.1	protein kinase family protein	0	kinase
Bra010746	36.637	7.86523	-2.21974	7.3525e-149	1.30583e-147	NP_195548.5	hedgehog receptor	0	others
Bra010748	51.5581	17.5934	-1.55116	1.09584e-76	1.287e-75	XP_002870333.1	hypothetical protein ARALYDRAFT_493493	0	unkown funciton
Bra010750	23.274	4.23431	-2.45852	1.77386e-57	1.74398e-56	XP_002868304.1	hypothetical protein ARALYDRAFT_915472	4.59427e-179	unkown funciton
Bra010759	15.1311	6.65276	-1.18549	9.23168e-19	4.85659e-18	XP_002868293.1	hypothetical protein ARALYDRAFT_493476	0	unkown funciton
Bra010764	23.5634	49.8596	1.08133	1.66311e-13	7.02769e-13	NP_174336.1	DRT111; nucleic acid binding / nucleotide binding	1.48408e-116	transcription regulation
Bra010767	31.209	11.7939	-1.40392	3.4697e-35	2.51756e-34	XP_002893618.1	hypothetical protein ARALYDRAFT_890588	0	unkown funciton
Bra010775	351.867	63.669	-2.46637	0	0	ABV89627.1	early-responsive to dehydration 4	0	universal stress related
Bra010781	106.214	19.7903	-2.4241	7.12718e-208	1.49045e-206	BAJ33766.1	unnamed protein product	0	unkown funciton
Bra010782	153.117	37.8633	-2.01577	0	0	BAJ33766.1	unnamed protein product	0	unkown funciton
Bra010794	137.473	46.1154	-1.57583	6.22904e-38	4.71132e-37	XP_002890853.1	predicted protein	7.01655e-50	unkown funciton
Bra010795	40.626	135.464	1.73743	7.39186e-13	2.82012e-12	BAH19762.1	AT1G30130	3.64357e-139	unkown funciton
Bra010802	17.9446	112.455	2.64773	0	0	XP_002890845.1	ATGA2OX2	2.4861e-168	signal transduction
Bra010806	72.5604	29.6788	-1.28975	2.6621e-27	1.67869e-26	XP_002890839.1	hypothetical protein ARALYDRAFT_473207	4.65152e-71	unkown funciton
Bra010830	62.0117	8.20403	-2.91814	4.91336e-183	9.76951e-182	XP_002893569.1	hypothetical protein ARALYDRAFT_473159	0	unkown funciton
Bra010832	38.9787	6.17016	-2.65931	1.67504e-126	2.72209e-125	NP_174229.2	unknown protein	0	unkown funciton
Bra010852	28.5404	102.415	1.84334	0	0	XP_002890790.1	ribosomal protein L34 family protein	3.03702e-43	translation regulation
Bra010876	119.342	27.5743	-2.1137	1.09829e-101	1.54979e-100	XP_002893529.1	hypothetical protein ARALYDRAFT_473059	1.69474e-108	unkown funciton
Bra010879	11.3694	49.8044	2.13112	1.06359e-13	4.61527e-13	BAJ34587.1	unnamed protein product	0	unkown funciton
Bra010880	198.298	57.6935	-1.78119	1.3975e-83	1.73982e-82	ABI54330.1	putative ethylene-responsive element binding factor	2.25803e-69	signal transduction
Bra010902	41.1054	15.1427	-1.4407	9.56042e-25	5.7289e-24	AAM60966.1	unknown	3.38069e-135	unkown funciton
Bra010909	22.6229	10.1207	-1.16047	2.80106e-17	1.41551e-16	XP_002890754.1	pyridoxal-dependent decarboxylase family protein	0	carbohydrate metabolism
Bra010910	30.4591	227.71	2.90225	3.73034e-14	1.69182e-13	NP_001077612.1	NTF2B (NUCLEAR TRANSPORT FACTOR 2B); Ran GTPase binding/ protein transporter	7.5709e-49	transporter facilitation
Bra010917	68.8559	8.34242	-3.04504	0	0	NP_849716.1	ACA1 (AUTO-INHIBITED CA2+-ATPASE 1); calcium channel/ calcium-transporting ATPase/ calmodulin binding	0	transporter facilitation
Bra010919	14.3267	4.72436	-1.60052	1.94434e-31	1.31795e-30	NP_001077611.1	unknown protein	0	unkown funciton
Bra010924	11.2561	26.9203	1.25798	2.30704e-13	9.53666e-13	NP_564291.1	unknown protein	0	unkown funciton
Bra010926	23.2699	53.2331	1.19386	5.47562e-13	2.13028e-12	BAJ34257.1	unnamed protein product	1.30974e-87	unkown funciton
Bra010965	121.989	16.0894	-2.92257	5.21904e-282	1.23727e-280	O04450.1	TCPE_ARATH RecName: Full=T-complex protein 1 subunit epsilon; Short=TCP-1-epsilon; AltName: Full=CCT-epsilon	0	others
Bra010970	47.2393	292.848	2.63209	0	0	AAV84502.1	At1g24575	2.00587e-25	unkown funciton
Bra010976	23.3727	1.73467	-3.75209	1.19155e-228	2.60615e-227	NP_173871.6	unknown protein	0	unkown funciton
Bra010983	15.5597	64.3458	2.04803	5.86198e-14	2.61075e-13	XP_002887155.1	hypothetical protein ARALYDRAFT_475905	1.52555e-93	unkown funciton
Bra010984	47.1868	462.86	3.29412	1.65201e-13	6.99744e-13	BAH19950.1	AT1G25275	3.78212e-24	unkown funciton
Bra010985	29.2539	74.1211	1.34125	1.24611e-12	4.61626e-12	BAJ33625.1	unnamed protein product	0	unkown funciton
Bra011009	189.379	48.7541	-1.95768	1e-307	2.43763e-306	XP_002890678.1	hypothetical protein ARALYDRAFT_472806	0	unkown funciton
Bra011020	29.0937	63.0123	1.11493	0	0	NP_564242.1	phosphatidylinositol 3- and 4-kinase family protein	0	kinase
Bra011030	77.4303	8.19577	-3.23995	0	0	XP_002884212.1	AtRPN1a/RPN1A	0	protein degradation
Bra011038	27.0601	12.3518	-1.13145	1.53257e-17	7.8041e-17	NP_567812.1	CKL6 (CASEIN KINASE I-LIKE 6); kinase/ protein serine/threonine kinase	0	kinase
Bra011045	20.4696	71.7643	1.80979	2.81552e-13	1.14532e-12	BAJ34152.1	unnamed protein product	1.69526e-95	unkown funciton
Bra011046	4.32176	11.1055	1.36158	1.01696e-13	4.42134e-13	CAB81453.1	receptor protein kinase-like protein	0	kinase
Bra011081	30.8933	15.2018	-1.02305	1.44346e-58	1.43684e-57	NP_194417.2	aspartyl-tRNA synthetase, putative / aspartate--tRNA ligase, putative	0	translation regulation
Bra011082	106.512	34.7502	-1.61592	2.32434e-66	2.48487e-65	BAJ33683.1	unnamed protein product	2.67729e-120	unkown funciton
Bra011083	60.4094	24.0063	-1.33136	6.01502e-40	4.69283e-39	XP_002869453.1	hypothetical protein ARALYDRAFT_913602	1.01114e-161	unkown funciton
Bra011087	160.993	965.495	2.58427	3.5929e-12	1.27792e-11	BAJ33902.1	unnamed protein product	7.08186e-180	unkown funciton
Bra011089	21.6587	8.18247	-1.40434	2.41238e-21	1.34629e-20	XP_002867420.1	phosphofructokinase family protein	0	kinase
Bra011104	9.96405	2.28063	-2.1273	6.28086e-46	5.35988e-45	XP_002869433.1	kinase family protein	0	kinase
Bra011117	58.6408	22.0653	-1.41012	2.58908e-51	2.36761e-50	NP_194678.2	aminopeptidase/ manganese ion binding	0	protein degradation
Bra011118	48.1757	5.70994	-3.07676	1.42505e-86	1.81011e-85	XP_002869429.1	hypothetical protein ARALYDRAFT_491807	0	unkown funciton
Bra011120	11.9686	24.8889	1.05625	1.12504e-08	3.28122e-08	XP_002869428.1	2,3-diketo-5-methylthio-1-phosphopentane phosphatase family	1.37626e-116	Nitrogen metabolism
Bra011128	50.6436	23.7667	-1.09144	5.98668e-31	4.02469e-30	XP_002867396.1	type I phosphodiesterase/nucleotide pyrophosphatase family protein	0	others
Bra011134	6.25093	13.688	1.13076	7.32748e-14	3.22654e-13	AAO64885.1	At5g22355	1.03487e-141	unkown funciton
Bra011141	47.7503	141.852	1.5708	5.26246e-14	2.34964e-13	ABD57496.1	At4g29850	1.4065e-42	unkown funciton
Bra011160	91.1679	3.17687	-4.84285	0	0	NP_567839.1	subtilase family protein	0	protein degradation
Bra011173	12.2889	30.1858	1.29652	0	0	XP_002867362.1	hypothetical protein ARALYDRAFT_491730	0	unkown funciton
Bra011179	121.12	9.74523	-3.6356	2.06968e-180	4.08222e-179	BAJ33741.1	unnamed protein product	4.17741e-147	unkown funciton
Bra011186	21.7675	9.4278	-1.20718	4.21488e-23	2.44849e-22	XP_002867353.1	ATCNGC17	0	unkown funciton
Bra011203	95.6081	34.9929	-1.45007	5.90772e-108	8.72174e-107	XP_002867337.1	signal recognition particle receptor alpha subunit family protein	0	signal transduction
Bra011216	43.0262	15.2093	-1.50027	2.30048e-28	1.47988e-27	XP_002873098.1	hypothetical protein ARALYDRAFT_349631	2.24384e-12	unkown funciton
Bra011230	39.7924	8.07378	-2.30118	1.97661e-79	2.38545e-78	XP_002867323.1	ubiquitin-specific protease 24	0	protein degradation
Bra011231	30.7494	15.1794	-1.01845	8.48308e-12	2.92443e-11	XP_002869355.1	hypothetical protein ARALYDRAFT_913382	3.66944e-169	unkown funciton
Bra011236	79.487	667.142	3.0692	0	0	AAL37170.1	AF319169_1 CBL-interacting protein kinase	0	kinase
Bra011241	37.2698	14.2714	-1.38488	1.31308e-35	9.59071e-35	XP_002869350.1	calmodulin-binding protein	0	transporter facilitation
Bra011249	54.4863	14.4715	-1.91268	6.51736e-71	7.28963e-70	XP_002869343.1	glycosyl hydrolase family 17 protein	0	carbohydrate metabolism
Bra011251	104.354	49.8253	-1.06654	1.69833e-65	1.80536e-64	XP_002869341.1	hypothetical protein ARALYDRAFT_491623	0	unkown funciton
Bra011260	111.691	55.5429	-1.00784	1.92415e-51	1.7631e-50	NP_567873.1	myosin heavy chain-related	0	others
Bra011262	37.5492	13.5857	-1.46669	2.43528e-27	1.53718e-26	AAP37831.1	At4g31350	0	unkown funciton
Bra011270	39.3512	12.7128	-1.63013	1.40791e-34	1.01099e-33	BAJ34316.1	unnamed protein product	2.95433e-174	unkown funciton
Bra011296	19.0887	38.8016	1.0234	2.16494e-13	8.98415e-13	XP_002867281.1	hypothetical protein ARALYDRAFT_491566	1.8054e-162	unkown funciton
Bra011299	32.5792	74.6123	1.19546	0	0	AAS13378.1	WRKY1	4.14221e-125	transcription regulation
Bra011307	17.8573	4.27671	-2.06194	1.06161e-48	9.39071e-48	XP_002867272.1	hypothetical protein ARALYDRAFT_491547	6.08849e-177	unkown funciton
Bra011308	31.7799	8.05277	-1.98056	2.85552e-46	2.44727e-45	NP_194917.1	armadillo/beta-catenin repeat family protein	0	signal transduction
Bra011314	19.0619	49.3019	1.37095	0	0	XP_002867266.1	hypothetical protein ARALYDRAFT_491537	0	unkown funciton
Bra011319	20.6414	50.8512	1.30074	3.94574e-13	1.5695e-12	NP_194934.1	calcium-binding EF hand family protein	0	small molecular
Bra011326	25.3079	3.80926	-2.73201	4.99258e-75	5.78057e-74	NP_567888.2	phox (PX) domain-containing protein	0	others
Bra011327	25.8148	9.56253	-1.43274	6.27658e-43	5.13397e-42	XP_002867254.1	ATPANK2	0	Energy
Bra011328	25.5501	7.25733	-1.81582	7.0091e-49	6.21037e-48	AAK25873.1	AF360163_1 unknown protein	0	unkown funciton
Bra011329	42.8106	160.513	1.90665	5.24914e-13	2.0469e-12	NP_194953.1	ATP synthase family	3.19664e-55	Energy
Bra011338	76.7439	30.6688	-1.32328	8.4388e-43	6.89197e-42	XP_002869282.1	hypothetical protein ARALYDRAFT_491495	4.06326e-129	unkown funciton
Bra011345	255.333	22.3133	-3.5164	0	0	ACS68190.1	cellulose synthase 1.2 catalytic subunit	0	cell wall
Bra011350	73.1179	202.204	1.46752	0	0	XP_002867242.1	hypothetical protein ARALYDRAFT_913201	1.18664e-41	unkown funciton
Bra011355	22.9839	5.25757	-2.12815	2.36444e-56	2.29007e-55	XP_002869264.1	hypothetical protein ARALYDRAFT_491464	0	unkown funciton
Bra011364	14.0095	3.02504	-2.21138	2.85676e-57	2.80347e-56	XP_002869260.1	nucleic acid binding protein	0	transcription regulation
Bra011366	56.4275	16.0753	-1.81155	4.39968e-152	7.92861e-151	NP_194990.4	protein binding / zinc ion binding	0	transporter facilitation
Bra011375	46.035	6.36567	-2.85435	7.33132e-88	9.43996e-87	XP_002869250.1	RNA recognition motif-containing protein	1.3665e-178	DNA or RNA binding
Bra011378	61.8376	17.4703	-1.82358	2.5338e-101	3.56911e-100	NP_195002.2	protein transporter	0	transporter facilitation
Bra011383	80.2855	14.0845	-2.51103	3.71548e-69	4.08562e-68	Q9M080.1	RecName: Full=Ethylene-responsive transcription factor ERF043	5.2829e-72	transcription regulation
Bra011387	82.4843	217.088	1.39609	4.45132e-12	1.56978e-11	NP_195010.1	PFK6 (PHOSPHOFRUCTOKINASE 6); 6-phosphofructokinase	0	kinase
Bra011388	23.7042	11.2836	-1.07092	1.1315e-12	4.22153e-12	XP_002869239.1	poly(A) polymerase	0	DNA or RNA binding
Bra011392	35.4531	5.19646	-2.77031	8.53814e-122	1.35444e-120	NP_195014.1	ATHB-8 (HOMEOBOX GENE 8); DNA binding / transcription factor	0	transcription regulation
Bra011395	29.4878	4.17781	-2.8193	7.39336e-90	9.64823e-89	NP_567908.1	unknown protein	0	unkown funciton
Bra011396	4.28908	13.4956	1.65375	0	0	XP_002867220.1	glycine-rich protein	0	universal stress related
Bra011397	22.5945	66.446	1.55621	6.0174e-14	2.67623e-13	NP_567911.1	unknown protein	1.85913e-94	unkown funciton
Bra011405	229.333	47.7102	-2.26507	0	0	XP_002867212.1	hypothetical protein ARALYDRAFT_491390	0	unkown funciton
Bra011410	24.8504	11.0546	-1.16862	2.04166e-17	1.03536e-16	XP_002869225.1	peptidyl-prolyl cis-trans isomerase cyclophilin-type family protein	0	others
Bra011411	53.9524	23.9927	-1.16909	8.89742e-38	6.70889e-37	BAC76896.1	protein kinase	0	kinase
Bra011412	60.477	19.0832	-1.66408	1.47541e-116	2.26838e-115	NP_195035.2	APM1 (AMINOPEPTIDASE M1); aminopeptidase	0	protein degradation
Bra011429	19.0823	4.65759	-2.03458	5.56892e-95	7.53846e-94	XP_002867192.1	hypothetical protein ARALYDRAFT_491361	0	unkown funciton
Bra011438	4.95948	227.349	5.51858	1.99618e-13	8.34783e-13	ACI31314.1	At4g33420	2.41209e-143	unkown funciton
Bra011445	25.3887	55.8617	1.13767	1.85185e-13	7.77685e-13	XP_002867176.1	hypothetical protein ARALYDRAFT_491340	1.33108e-118	unkown funciton
Bra011451	30.9382	8.42833	-1.87607	1.53765e-69	1.69609e-68	NP_195079.2	KUP5; potassium ion transmembrane transporter	0	transporter facilitation
Bra011466	23.4961	11.7076	-1.00498	9.43966e-12	3.2437e-11	NP_001154285.1	unknown protein	2.6288e-62	unkown funciton
Bra011468	7.30104	106.217	3.86276	0	0	NP_195103.3	inositol 1,3,4-trisphosphate 5/6-kinase family protein	3.2866e-178	kinase
Bra011469	38.8693	79.2141	1.02712	0	0	XP_002867158.1	hypothetical protein ARALYDRAFT_491300	5.58137e-67	unkown funciton
Bra011477	182.759	378.626	1.05083	6.18394e-13	2.38637e-12	NP_189984.1	40S ribosomal protein S29 (RPS29A)	8.26717e-27	translation regulation
Bra011485	26.2053	74.8175	1.51352	4.33876e-13	1.71727e-12	BAJ34494.1	unnamed protein product	9.5947e-122	unkown funciton
Bra011487	55.1407	18.599	-1.56789	7.69034e-125	1.2384e-123	XP_002869176.1	protein binding protein	0	unkown funciton
Bra011505	22.3695	94.3555	2.07657	1.24567e-13	5.35947e-13	ABV89639.1	stress enhanced protein 1	1.50778e-42	universal stress related
Bra011506	30.3299	8.51595	-1.8325	1.8029e-48	1.59127e-47	XP_002867129.1	hypothetical protein ARALYDRAFT_491252	0	unkown funciton
Bra011524	23.6712	11.5356	-1.03704	1.70317e-16	8.42954e-16	XP_002869152.1	IBR domain-containing protein	0	others
Bra011526	23.1276	6.5184	-1.82702	4.12438e-38	3.12761e-37	XP_002869151.1	extra-large GTP-binding protein 2	0	small molecular
Bra011533	15.295	2.48675	-2.62072	2.61922e-56	2.53376e-55	NP_195169.3	CHB3; DNA binding / transcription factor/ zinc ion binding	0	transcription regulation
Bra011535	115.352	12.585	-3.19626	0	0	Q0WW26.2	Coatomer subunit gamma	1.18167e-133	others
Bra011545	199.942	83.6612	-1.25695	1.65453e-53	1.5544e-52	NP_195185.1	GBF6 (G-BOX BINDING FACTOR 6); DNA binding/ protein heterodimerization/ transcription factor	6.55623e-46	transcription regulation
Bra011550	41.0365	18.5753	-1.14352	1.71688e-20	9.44285e-20	XP_002867108.1	SH3 domain-containing protein 2	0	others
Bra011556	147.545	483.13	1.71125	1.08202e-12	4.04546e-12	XP_002313006.1	predicted protein	2.99917e-57	unkown funciton
Bra011568	396.247	1799.15	2.18284	4.02678e-12	1.4251e-11	ABV26711.1	cyclophilin	1.10197e-68	others
Bra011573	11.385	118.491	3.37957	3.07088e-13	1.24287e-12	XP_002867099.1	nodulin family protein	0	unkown funciton
Bra011585	131.974	756.925	2.51989	1.67755e-12	6.13199e-12	AAG30607.1	aquaporin	6.8276e-158	transporter facilitation
Bra011596	58.3048	26.9655	-1.1125	2.89992e-37	2.16565e-36	NP_567980.1	BSK1 (BR-SIGNALING KINASE 1); ATP binding / binding / kinase/ protein kinase/ protein tyrosine kinase	0	kinase
Bra011598	62.6073	29.4938	-1.08592	1.10878e-28	7.17318e-28	XP_002864695.1	phospholipid/glycerol acyltransferase family protein	0	lipid metabolism
Bra011604	418.285	32.9651	-3.66548	0	0	NP_849565.1	TMT2 (TONOPLAST MONOSACCHARIDE TRANSPORTER2); carbohydrate transmembrane transporter/ nucleoside transmembrane transporter/ sugar:hydrogen symporter	0	transporter facilitation
Bra011605	188.701	31.7498	-2.57129	0	0	NP_195257.1	CPK5 (calmodulin-domain protein kinase 5); ATP binding / calcium ion binding / calmodulin-dependent protein kinase/ kinase/ protein kinase/ protein serine/threonine kinase	0	kinase
Bra011609	57.8564	25.8137	-1.16434	7.00102e-29	4.54952e-28	XP_002867075.1	hypothetical protein ARALYDRAFT_491111	0	unkown funciton
Bra011615	6.67708	23.543	1.81801	4.996e-14	2.23692e-13	ADD09862.1	chloride channel E	0	transporter facilitation
Bra011616	128.062	395.878	1.62822	5.15988e-12	1.81007e-11	BAJ33771.1	unnamed protein product	2.65081e-152	unkown funciton
Bra011617	8.84878	40.9088	2.20886	4.10782e-14	1.85695e-13	AAM10777.1	PSR9	0	unkown funciton
Bra011618	14.8587	33.3963	1.16838	2.09586e-10	6.73921e-10	XP_002867072.1	ring-H2 finger A3B	1.37021e-66	transcription regulation
Bra011633	39.9959	81.5282	1.02745	2.1494e-13	8.9243e-13	NP_195298.2	unknown protein	7.5118e-166	unkown funciton
Bra011638	5.99244	1.5669	-1.93523	5.92488e-45	4.98417e-44	XP_002867052.1	hypothetical protein ARALYDRAFT_491060	0	unkown funciton
Bra011642	184.703	17.2378	-3.42156	0	0	NP_195308.1	aconitate hydratase, cytoplasmic / citrate hydro-lyase / aconitase (ACO)	0	carbohydrate metabolism
Bra011643	25.1827	146.595	2.54133	0	0	XP_002869057.1	zinc finger family protein	3.68773e-124	transcription regulation
Bra011644	37.1488	16.837	-1.14168	2.16078e-24	1.28612e-23	AAM65849.1	unknown	0	unkown funciton
Bra011645	98.4106	788.591	3.00239	0	0	XP_002867050.1	GTP-binding 2	8.13607e-106	small molecular
Bra011646	51.7598	21.5996	-1.26083	1.90541e-41	1.5238e-40	XP_002869053.1	aspartyl protease family protein	0	protein degradation
Bra011647	22.0903	45.965	1.05712	7.12098e-13	2.72263e-12	XP_002869052.1	La domain-containing protein	7.66899e-141	others
Bra011649	59.6631	13.654	-2.12751	5.06184e-77	5.96457e-76	XP_002867046.1	hypothetical protein ARALYDRAFT_491044	0	unkown funciton
Bra011656	17.3026	952.953	5.78334	4.61852e-14	2.07577e-13	XP_002867039.1	DNAJ heat shock N-terminal domain-containing protein	3.42014e-68	universal stress related
Bra011668	16.3486	4.19878	-1.96113	1.3438e-51	1.23451e-50	XP_002867031.1	hypothetical protein ARALYDRAFT_491015	0	unkown funciton
Bra011669	45.1226	16.467	-1.45427	3.99434e-45	3.36902e-44	XP_002869041.1	serine carboxypeptidase S28 family protein	0	protein degradation
Bra011670	44.5786	18.7243	-1.25144	6.50842e-45	5.46786e-44	NP_001078500.2	unknown protein	0	unkown funciton
Bra011671	52.2278	21.3564	-1.29015	2.40246e-40	1.88728e-39	AAG14961.1	AF214007_1 cytochrome p450-dependent monooxygenase	0	oxidation reduction
Bra011676	13.9243	2.43011	-2.51852	5.69214e-67	6.13249e-66	XP_002867022.1	predicted protein	0	unkown funciton
Bra011677	50.7533	9.44994	-2.42513	1.75109e-154	3.18074e-153	BAJ34544.1	unnamed protein product	0	unkown funciton
Bra011688	13.9172	3.59852	-1.95139	1.16776e-48	1.03239e-47	NP_195370.5	heat shock protein binding	6.94869e-134	universal stress related
Bra011700	45.7965	6.50642	-2.8153	9.23358e-133	1.54456e-131	NP_195389.4	transcription factor	0	transcription regulation
Bra011706	18.9644	373.97	4.30156	0	0	Q94A43.1	RecName: Full=BES1/BZR1 homolog protein 2	1.12215e-116	transcription regulation
Bra011709	11.2907	88.1537	2.96488	0	0	Q43133.1	Full=Geranylgeranyl pyrophosphate synthase, chloroplastic/chromoplastic;	1.54089e-174	secondary metabolism
Bra011720	16.1963	46.7304	1.5287	0	0	BAH19394.1	AT4G37180	5.78722e-114	unkown funciton
Bra011722	14.9339	118.264	2.98534	1.41442e-13	6.03431e-13	XP_002869010.1	hypothetical protein ARALYDRAFT_912657	1.90977e-124	unkown funciton
Bra011735	41.6131	112.349	1.43287	0	0	ABV89640.1	heat shock factor 4	2.6958e-109	universal stress related
Bra011737	7.21866	18.7612	1.37795	0	0	XP_002869002.1	hypothetical protein ARALYDRAFT_912636	6.06764e-136	unkown funciton
Bra011745	41.0234	17.966	-1.19118	7.14736e-30	4.72442e-29	NP_195407.2	IRX14 (irregular xylem 14); transferase, transferring glycosyl groups / xylosyltransferase	0	cell wall
Bra011750	19.5148	9.24699	-1.07751	1.0844e-19	5.86024e-19	XP_002866960.1	hypothetical protein ARALYDRAFT_490893	0	unkown funciton
Bra011755	7.32945	24.1025	1.7174	0	0	XP_002866957.1	CYP81H1	0	oxidation reduction
Bra011771	39.1013	115.933	1.56801	0	0	BAJ34486.1	unnamed protein product	3.13973e-168	unkown funciton
Bra011773	24.9492	11.693	-1.09335	1.1752e-14	5.48089e-14	XP_002868982.1	hypothetical protein ARALYDRAFT_490862	0	unkown funciton
Bra011786	12.5053	31.556	1.33537	1.65201e-13	6.99837e-13	NP_195493.1	HAT22; transcription factor	1.35635e-113	transcription regulation
Bra011792	637.516	147.467	-2.11207	0	0	NP_195500.1	PCK1 (PHOSPHOENOLPYRUVATE CARBOXYKINASE 1); ATP binding / phosphoenolpyruvate carboxykinase (ATP)/ phosphoenolpyruvate carboxykinase/ purine nucleotide binding	0	kinase
Bra011793	28.9887	81.9371	1.49903	7.62502e-13	2.90526e-12	XP_002868961.1	protein binding protein	0	unkown funciton
Bra011794	71.2466	20.7024	-1.78303	5.64678e-118	8.76184e-117	XP_002866924.1	mthsc70-1	0	others
Bra011808	186.188	1421.69	2.93278	5.52868e-12	1.93349e-11	BAJ33818.1	unnamed protein product	7.16461e-129	unkown funciton
Bra011824	31.5766	79.7286	1.33624	4.039e-13	1.6048e-12	AAL15282.1	unnamed protein product	2.27309e-94	unkown funciton
Bra011827	8.8911	20.3198	1.19245	9.08956e-11	2.97303e-10	XP_002866889.1	hypothetical protein ARALYDRAFT_912474	1.10409e-133	unkown funciton
Bra011828	387.122	27.2533	-3.82829	0	0	NP_195694.1	unknown protein	2.08303e-137	unkown funciton
Bra011843	95.7929	28.9088	-1.72841	2.34658e-106	3.41226e-105	XP_002866874.1	hypothetical protein ARALYDRAFT_490746	0	unkown funciton
Bra011848	24.5743	3.28023	-2.90528	1.45054e-78	1.73743e-77	XP_002888041.1	hypothetical protein ARALYDRAFT_475134	0	unkown funciton
Bra011849	21.1713	2.57724	-3.03821	8.48034e-114	1.28892e-112	XP_002888041.1	hypothetical protein ARALYDRAFT_475134	0	unkown funciton
Bra011873	13.8099	30.6635	1.15082	0	0	XP_002868889.1	protein binding protein	0	unkown funciton
Bra011878	46.8688	5.4355	-3.10814	1.90623e-161	3.56392e-160	XP_002866830.1	VHA-A3	0	others
Bra011899	68.2856	155.324	1.18563	1.02229e-12	3.83561e-12	NP_195553.1	ATEXLA2 (ARABIDOPSIS THALIANA EXPANSIN-LIKE A2)	1.65148e-105	cell wall
Bra011902	133.277	33.8684	-1.97641	1.14421e-159	2.12061e-158	AAL75900.1	AT4g38220/F20D10_340	0	unkown funciton
Bra011907	61.5578	171.958	1.48204	3.55716e-13	1.42237e-12	ABF83658.1	At1g55265	1.55014e-48	unknown function
Bra011916	62.0205	216.636	1.80446	2.41806e-13	9.93386e-13	XP_002894505.1	hypothetical protein ARALYDRAFT_892538	2.04354e-153	unkown funciton
Bra011930	219.19	732.522	1.74069	7.7005e-13	2.93227e-12	XP_002862747.1	hypothetical protein ARALYDRAFT_333229	6.4437e-44	unkown funciton
Bra011941	17.3604	3.03558	-2.51575	6.52288e-54	6.14984e-53	XP_002879161.1	VHA-A1	0	others
Bra011946	15.316	6.6751	-1.19818	6.19006e-19	3.27535e-18	BAD20774.2	beta-galactosidase	0	carbohydrate metabolism
Bra011947	18.8454	2.95183	-2.67453	1.22332e-59	1.22921e-58	XP_002879095.1	predicted protein	0	unkown funciton
Bra011955	31.3702	7.13069	-2.13728	1.20257e-68	1.31512e-67	BAJ34144.1	unnamed protein product	0	unkown funciton
Bra011956	45.1813	94.6821	1.06737	1.30118e-13	5.57877e-13	XP_002880933.1	hypothetical protein ARALYDRAFT_901675	4.83654e-83	unkown funciton
Bra011981	23.3619	5.91248	-1.98232	9.28266e-49	8.218e-48	NP_850111.1	ABC transporter family protein	0	transporter facilitation
Bra011985	105.103	21.3652	-2.29847	6.70216e-205	1.39245e-203	P34794.1	RUB2_BRANA RecName: Full=RuBisCO large subunit-binding protein subunit alpha, chloroplastic	0	carbohydrate metabolism
Bra011990	22.2727	9.49915	-1.22941	2.3463e-25	1.42659e-24	XP_002879127.1	hypothetical protein ARALYDRAFT_901726	0	unkown funciton
Bra011993	58.7041	13.2641	-2.14593	4.37832e-174	8.4941e-173	XP_002880962.1	hypothetical protein ARALYDRAFT_481718	0	unkown funciton
Bra011994	16.3925	85.532	2.38343	0	0	XP_002880964.1	hypothetical protein ARALYDRAFT_481720	1.80382e-82	unkown funciton
Bra012017	29.4956	6.4463	-2.19396	1.79469e-70	2.00034e-69	NP_565651.1	sec23/sec24 transport family protein	0	transporter facilitation
Bra012023	55.8112	10.5842	-2.39864	8.40082e-102	1.18701e-100	NP_973544.1	OTU-like cysteine protease family protein	5.71919e-155	protein degradation
Bra012028	52.9425	7.7338	-2.77518	5.90132e-131	9.77421e-130	BAJ33802.1	unnamed protein product	0	unkown funciton
Bra012034	49.0125	8.43508	-2.53868	1.37399e-130	2.27217e-129	XP_002879061.1	hypothetical protein ARALYDRAFT_481593	0	unkown funciton
Bra012035	36.6045	17.462	-1.0678	4.05614e-31	2.73201e-30	AAS99727.1	At2g27090	0	unkown funciton
Bra012041	25.9662	6.30034	-2.04313	8.88464e-191	1.79225e-189	NP_180257.3	GRV2 (GRAVITROPISM DEFECTIVE 2); binding / heat shock protein binding	0	universal stress related
Bra012044	48.0937	22.3538	-1.10533	2.80854e-28	1.80199e-27	NP_180245.1	plectin-related	0	cytoskeleton
Bra012045	31.0693	9.69726	-1.67984	6.16232e-45	5.18255e-44	XP_002879005.1	hypothetical protein ARALYDRAFT_481544	0	unkown funciton
Bra012052	85.6213	30.0228	-1.51191	1.83545e-86	2.32862e-85	NP_850084.1	nitrate transporter (NTP2)	0	transporter facilitation
Bra012055	11.8412	24.5271	1.05056	1.76971e-09	5.40994e-09	XP_002866771.1	hypothetical protein ARALYDRAFT_497000	3.79893e-108	unkown funciton
Bra012069	36.9869	8.99187	-2.04032	9.05028e-80	1.09637e-78	XP_002865070.1	hypothetical protein ARALYDRAFT_496963	0	unkown funciton
Bra012082	15.8889	6.5991	-1.26768	4.03274e-17	2.03119e-16	NP_201457.1	phototropic-responsive NPH3 family protein	0	kinase
Bra012091	91.7464	36.2803	-1.33847	2.35384e-65	2.49801e-64	XP_002865052.1	hypothetical protein ARALYDRAFT_920056	0	unkown funciton
Bra012100	151.881	47.5585	-1.67516	9.74102e-210	2.0532e-208	BAJ33900.1	unnamed protein product	0	unkown funciton
Bra012106	26.5822	12.4618	-1.09294	1.06639e-22	6.12903e-22	NP_201482.2	unknown protein	0	unkown funciton
Bra012117	88.4962	6.7348	-3.71591	5.42774e-258	1.24069e-256	XP_002866726.1	predicted protein	0	unkown funciton
Bra012127	68.1728	17.733	-1.94276	7.9302e-124	1.27254e-122	ACM68704.1	zeaxanthin epoxidase	0	secondary metabolism
Bra012140	23.8592	126.001	2.40082	0	0	BAJ34079.1	unnamed protein product	1.51263e-75	unkown funciton
Bra012148	36.6012	7.21716	-2.34239	4.1129e-93	5.48152e-92	XP_002865012.1	hypothetical protein ARALYDRAFT_496872	0	unkown funciton
Bra012176	11.9273	44.7096	1.90631	6.77236e-14	2.99573e-13	P93051.2	ERDL7_ARATH RecName: Full=Sugar transporter ERD6-like 7	0	transporter facilitation
Bra012191	79.6798	38.3245	-1.05595	1.34108e-48	1.18464e-47	ABV89658.1	UVB-resistance protein UVR8	0	universal stress related
Bra012197	31.7455	64.3768	1.01999	2.64234e-13	1.07997e-12	XP_002890358.1	vacuolar-H+-pumping ATPase 16 kDa proteolipid subunit 2	1.66789e-50	Energy
Bra012223	321.322	130.679	-1.29799	1.30303e-230	2.86568e-229	XP_002890376.1	hypothetical protein ARALYDRAFT_472256	0	unkown funciton
Bra012230	1647.34	350.804	-2.2314	0	0	ADJ96373.1	cold-regulated protein	1.67497e-64	universal stress related
Bra012238	1741.08	389.635	-2.15979	0	0	AAB53101.2	catalase	0	signal transduction
Bra012260	30.8242	2.76228	-3.48013	0	0	XP_002893142.1	EMB1507	0	Energy
Bra012280	11.9351	33.0311	1.46862	4.54526e-13	1.79057e-12	BAJ33657.1	unnamed protein product	0	unkown funciton
Bra012288	16.2333	4.67101	-1.79715	3.70952e-46	3.17492e-45	XP_002890448.1	calcium-binding EF hand family protein	0	small molecular
Bra012293	243.426	51.175	-2.24997	0	0	NP_173594.1	ATPDIL1-1 (PDI-LIKE 1-1); protein disulfide isomerase	0	Energy
Bra012299	7.27101	14.5921	1.00496	4.76648e-08	1.34057e-07	XP_002893189.1	hypothetical protein ARALYDRAFT_472428	6.27448e-170	unkown funciton
Bra012356	36.4136	149.745	2.03995	0	0	NP_564187.1	hydroxyproline-rich glycoprotein family protein	2.3e-24	universal stress related
Bra012368	14.8187	7.07264	-1.0671	5.61164e-27	3.52056e-26	NP_173737.1	unknown protein	0	unkown funciton
Bra012393	27.8881	2.65159	-3.39472	6.8782e-122	1.0922e-120	XP_002890600.1	GAMMA-ADAPTIN 1	0	universal stress related
Bra012422	45.6073	95.0318	1.05914	2.09832e-13	8.74291e-13	AAF79859.1	unnamed protein product	3.23069e-82	unkown funciton
Bra012433	18.1704	38.4273	1.08054	0	0	XP_002893362.1	hypothetical protein ARALYDRAFT_890015	6.52427e-160	unkown funciton
Bra012470	38.8325	16.3461	-1.24832	1.42618e-66	1.53083e-65	XP_002890678.1	hypothetical protein ARALYDRAFT_472806	0	unkown funciton
Bra012474	30.5339	9.24744	-1.72328	1.4122e-42	1.15099e-41	BAJ33743.1	unnamed protein product	0	unkown funciton
Bra012506	158.357	28.8302	-2.45752	2e-304	4.86784e-303	O04450.1	TCPE_ARATH RecName: Full=T-complex protein 1 subunit epsilon; Short=TCP-1-epsilon; AltName: Full=CCT-epsilon	0	others
Bra012530	34.4564	78.7236	1.19203	0	0	NP_193723.3	unknown protein	0	unkown funciton
Bra012539	16.9149	2.40854	-2.81206	5.92346e-74	6.80899e-73	XP_002869986.1	protein binding protein	0	unkown funciton
Bra012543	5.68813	26.5565	2.22304	1.00364e-13	4.36937e-13	NP_567588.1	nodulin-related	0	unkown funciton
Bra012551	43.7864	14.6856	-1.57608	5.98066e-43	4.89442e-42	NP_567581.1	CYP707A1; (+)-abscisic acid 8'-hydroxylase/ oxygen binding	0	signal transduction
Bra012553	51.6177	11.9193	-2.11457	5.16296e-95	6.99486e-94	NP_193656.2	ATRLI2; transporter	0	transporter facilitation
Bra012557	98.6114	13.1619	-2.90538	1.02194e-254	2.32598e-253	XP_002867953.1	early-responsive to dehydration 3	0	universal stress related
Bra012578	84.6661	10.6555	-2.99019	0	0	ACS68199.1	cellulose synthase 8.2 catalytic subunit	0	cell wall
Bra012619	169.194	32.4656	-2.3817	2.2666e-123	3.62622e-122	XP_002870072.1	predicted protein	2.12283e-26	unkown funciton
Bra012632	17.257	43.9798	1.34966	0	0	NP_193524.2	zinc-binding family protein	2.32593e-108	transporter facilitation
Bra012642	76.3074	8.11237	-3.23363	0	0	ABD65165.1	trehalose-6-phosphate synthase, putative	0	carbohydrate metabolism
Bra012651	58.0882	262.142	2.17403	2.50022e-13	1.02411e-12	ABD65149.1	hypothetical protein 40.t00027	7.62956e-67	unkown funciton
Bra012653	22.0635	10.9037	-1.01685	6.91878e-14	3.05669e-13	ABD65180.1	glycine-rich protein -related	0	universal stress related
Bra012655	119.496	20.6607	-2.532	5.224e-96	7.10771e-95	ABD65178.1	calcineurin B-like protein, putative	8.85318e-116	small molecular
Bra012659	197.606	59.4812	-1.73212	2.58174e-162	4.84387e-161	ABD65145.1	nuclear RNA binding protein, putative	4.88097e-109	DNA or RNA binding
Bra012670	61.4459	11.8453	-2.375	2.40412e-73	2.7546e-72	XP_002870112.1	Mo25 family protein	1.30992e-172	others
Bra012671	81.637	1135.94	3.79852	0	0	ABD65134.1	L-lactate dehydrogenase, putative	0	carbohydrate metabolism
Bra012675	108.427	18.922	-2.51859	8.27814e-172	1.6021e-170	NP_193443.3	unknown protein	0	unkown funciton
Bra012676	1192.1	15.7084	-6.24582	0	0	NP_567523.1	CT-BMY (CHLOROPLAST BETA-AMYLASE); beta-amylase	0	carbohydrate metabolism
Bra012696	79.1915	21.6868	-1.86853	6.43424e-177	1.2582e-175	NP_567510.1	heat shock protein 70, putative / HSP70, putative	0	universal stress related
Bra012709	13.0544	31.8016	1.28456	5.25358e-13	2.04838e-12	XP_002868124.1	hypothetical protein ARALYDRAFT_355102	1.49904e-52	unkown funciton
Bra012716	131.075	282.113	1.10589	1.13265e-12	4.22485e-12	XP_002870157.1	hypothetical protein ARALYDRAFT_915104	1.05985e-50	unkown funciton
Bra012734	36.6054	2.93263	-3.64179	1.36006e-158	2.50467e-157	XP_002868153.1	predicted protein	0	unkown funciton
Bra012741	146.369	51.2353	-1.5144	2.68938e-101	3.78659e-100	NP_001154239.1	IMPA-2 (IMPORTIN ALPHA ISOFORM 2); binding / protein transporter	0	transporter facilitation
Bra012746	51.537	25.1949	-1.03248	1.00794e-16	5.01894e-16	NP_193008.1	NUDT7; ADP-ribose diphosphatase/ NAD or NADH binding / hydrolase/ nucleoside-diphosphatase/ protein homodimerization	5.31309e-131	carbohydrate metabolism
Bra012753	100.484	30.9703	-1.698	6.03464e-110	9.01329e-109	BAJ33622.1	unnamed protein product	0	unkown funciton
Bra012755	19.6735	2.65632	-2.88875	2.2426e-70	2.49609e-69	NP_188285.1	KINESIN-13A; ATP binding / microtubule motor	0	Energy
Bra012760	27.8386	80.0172	1.52322	0	0				no homology
Bra012761	38.7041	5.77384	-2.74488	1.48247e-131	2.4656e-130	NP_193319.6	protein binding	0	unkown funciton
Bra012763	58.6376	140.88	1.26457	8.4155e-14	3.6853e-13	XP_002868179.1	predicted protein	1.2969e-27	unkown funciton
Bra012764	61.4129	207.155	1.7541	3.08864e-13	1.24863e-12	XP_002870208.1	hypothetical protein ARALYDRAFT_493304	5.75461e-44	unkown funciton
Bra012779	17.1659	38.9193	1.18094	1.85185e-13	7.77788e-13	ABE60813.1	CLA1-like protein	0	secondary metabolism
Bra012805	4.65874	9.5045	1.02867	3.64784e-08	1.0325e-07	ABR46054.1	phytoalexin deficient 4	0	universal stress related
Bra012807	12.1797	25.9311	1.09021	1.66982e-11	5.67139e-11	XP_002876141.1	RNA-binding protein cp33	1.88944e-114	DNA or RNA binding
Bra012815	8.06024	2.50478	-1.68614	1.15823e-35	8.46161e-35	XP_002876132.1	myb family transcription factor	0	transcription regulation
Bra012818	36.3242	83.1748	1.19522	0	0	XP_002876128.1	hypothetical protein ARALYDRAFT_348313	3.92101e-90	unkown funciton
Bra012833	81.4005	34.7332	-1.22872	6.7245e-50	6.02676e-49	BAJ34292.1	unnamed protein product	1.92749e-166	unkown funciton
Bra012836	71.8985	35.4912	-1.0185	1.07984e-30	7.22448e-30	NP_190748.1	ATG2; aminopeptidase/ metalloexopeptidase	4.66636e-172	protein degradation
Bra012840	31.8437	146.123	2.19811	3.08864e-13	1.24911e-12	BAJ33968.1	unnamed protein product	1.33732e-95	unkown funciton
Bra012850	131.345	17.0687	-2.94393	0	0	ABT18094.1	FERONIA receptor-like kinase	0	kinase
Bra012868	14.037	5.34853	-1.39202	5.64336e-32	3.87048e-31	XP_002877789.1	hypothetical protein ARALYDRAFT_906461	0	unkown funciton
Bra012869	109.164	44.1797	-1.30504	8.38374e-38	6.32604e-37	BAE99915.1	hypothetical protein	1.22461e-88	unkown funciton
Bra012871	46.3677	13.3269	-1.79877	1.67164e-115	2.56021e-114	XP_002876065.1	FG-GAP repeat-containing protein	0	others
Bra012889	155.713	26.1799	-2.57236	6.55418e-121	1.03355e-119	Q8L3R2.2	RecName: Full=Probable calcium-binding protein CML41; AltName: Full=Calmodulin-like protein 41	3.37898e-74	small molecular
Bra012912	67.008	28.4591	-1.23544	4.57702e-47	3.96414e-46	XP_002877717.1	hypothetical protein ARALYDRAFT_485357	4.32143e-141	unkown funciton
Bra012952	99.0075	17.6052	-2.49154	0	0	XP_002866438.1	hypothetical protein ARALYDRAFT_496307	0	unkown funciton
Bra012958	40.9795	19.2732	-1.08831	6.43162e-23	3.71327e-22	AAK62454.1	AF387009_1 Unknown protein	0	unkown funciton
Bra012964	117.426	36.5687	-1.68307	3.13966e-151	5.63568e-150	ADA58339.1	pseudo-response regulator 1a	0	transcription regulation
Bra012975	230.593	47.3908	-2.28267	2.10412e-248	4.75519e-247	ABZ85667.1	LRR-like disease resistance protein	1.66869e-161	universal stress related
Bra012978	164.247	48.068	-1.77272	7.52528e-121	1.18552e-119	BAJ34130.1	unnamed protein product	6.60445e-141	unkown funciton
Bra012996	354.45	55.1504	-2.68414	0	0	XP_002866404.1	hypothetical protein ARALYDRAFT_496244	0	unkown funciton
Bra013003	45.2777	248.708	2.45758	8.4488e-13	3.2008e-12	BAJ34224.1	unnamed protein product	7.94954e-96	unkown funciton
Bra013012	19.7358	9.84249	-1.00372	7.97754e-17	3.98415e-16	XP_002874109.1	acyl-activating enzyme 17	0	others
Bra013016	11.5594	49.8955	2.10984	2.4336e-13	9.98614e-13	XP_002872035.1	hypothetical protein ARALYDRAFT_910318	4.11287e-115	unkown funciton
Bra013046	238.446	50.0986	-2.25082	0	0	ABG22608.1	Heat shock cognate 70 kDa protein, putative, expressed	0	universal stress related
Bra013048	39.362	111.629	1.50384	0	0	XP_002884017.1	DNA binding protein	4.32961e-88	transcription regulation
Bra013058	91.9636	438.37	2.25301	0	0	NP_565390.1	ADF5 (ACTIN DEPOLYMERIZING FACTOR 5); actin binding	6.41618e-72	cytoskeleton
Bra013087	189.693	459.871	1.27756	2.31126e-12	8.35471e-12	ABV89655.1	cold regulated 413 plasma membrane 1	2.43289e-98	unkown funciton
Bra013088	32.0116	852.453	4.73496	8.65974e-14	3.78551e-13	BAJ34348.1	unnamed protein product	2.2242e-24	unkown funciton
Bra013091	77.8117	1469.88	4.23957	1.36824e-12	5.05109e-12	NP_565383.1	MEE14 (maternal effect embryo arrest 14)	4.10959e-85	DNA or RNA binding
Bra013094	30.583	12.7857	-1.2582	1.9238e-24	1.14699e-23	AAD41980.1	unknown protein	0	unkown funciton
Bra013098	18.4758	49.2896	1.41565	5.22026e-13	2.03639e-12	XP_002885975.1	hypothetical protein ARALYDRAFT_899795	0	unkown funciton
Bra013116	1129.88	4995.84	2.14455	2.9089e-11	9.76452e-11				no homology
Bra013121	24.6568	5.19496	-2.2468	9.84644e-52	9.06389e-51	XP_002883854.1	hypothetical protein ARALYDRAFT_899691	0	unkown funciton
Bra013145	37.4804	7.55476	-2.31068	5.13132e-107	7.50268e-106	BAJ34245.1	unnamed protein product	0	unkown funciton
Bra013158	22.5319	9.57051	-1.2353	3.38044e-17	1.70533e-16	XP_002883771.1	hypothetical protein ARALYDRAFT_480281	0	unkown funciton
Bra013162	24.9864	5.20155	-2.26413	6.33702e-87	8.0718e-86	NP_178674.6	ELF8 (EARLY FLOWERING 8); binding	0	others
Bra013164	161.022	73.2068	-1.13721	2.17716e-60	2.20499e-59	Q6YDN9.1	Xyloglucan endotransglucosylase/hydrolase; AltName: Full=BobXET16A; Flags: Precursor	8.34633e-178	carbohydrate metabolism
Bra013167	38.7228	6.89703	-2.48914	2.6268e-109	3.91056e-108	XP_002883756.1	cycloartenol synthase	0	lipid metabolism
Bra013173	46.9187	139.62	1.57327	2.43138e-13	9.9873e-13	AAM62834.1	unknown	1.55375e-57	unkown funciton
Bra013186	16.9995	4.34573	-1.96782	1.61252e-52	1.49862e-51	NP_568532.1	AHK2 (ARABIDOPSIS HISTIDINE KINASE 2); cytokinin receptor/ osmosensor/ protein histidine kinase	0	kinase
Bra013194	50.8764	115.15	1.17845	4.996e-14	2.23786e-13	XP_002883662.1	hypothetical protein ARALYDRAFT_480112	6.55853e-40	unkown funciton
Bra013204	67.0505	184.4	1.45952	0	0	NP_178531.1	eukaryotic translation initiation factor 1A, putative	2.04834e-65	translation regulation
Bra013210	238.245	33.6507	-2.82374	0	0	XP_002883636.1	predicted protein	0	unkown funciton
Bra013217	69.1557	4.16916	-4.05202	0	0	XP_002885725.1	predicted protein	0	unkown funciton
Bra013224	160.892	49.7107	-1.69446	3.3568e-205	6.97869e-204	BAB02082.1	peptidylprolyl isomerase; FK506-binding protein	0	others
Bra013229	151.28	36.2583	-2.06083	9.07278e-246	2.03742e-244	XP_002863088.1	hypothetical protein ARALYDRAFT_497166	0	unkown funciton
Bra013233	96.4093	193.746	1.00693	6.44152e-13	2.47589e-12	ABM30198.2	resistance-gene-interacting protein	3.10663e-94	universal stress related
Bra013250	23.2355	70.7905	1.60722	3.07088e-13	1.24271e-12	XP_002883944.1	hypothetical protein ARALYDRAFT_480456	5.43603e-117	unkown funciton
Bra013253	17.7113	66.2853	1.90402	2.81552e-13	1.14547e-12	NP_189095.1	AT-HSFC1; DNA binding / transcription factor	1.03695e-97	transcription regulation
Bra013269	75.5701	1736.77	4.52245	4.15668e-13	1.64827e-12	NP_567545.1	binding	1.64224e-73	unkown funciton
Bra013282	125.835	10.151	-3.63184	0	0	XP_002868016.1	dehydration-responsive family protein	0	universal stress related
Bra013303	60.4785	125.075	1.0483	1.61227e-12	5.90893e-12	NP_193573.1	F-box family protein	4.19445e-138	protein degradation
Bra013320	41.8784	8.1393	-2.36323	1.63072e-58	1.62274e-57	NP_193588.5	unknown protein	0	unkown funciton
Bra013336	23.2296	4.03986	-2.52358	4.37574e-58	4.3287e-57	NP_193599.3	MRH1 (morphogenesis of root hair 1); ATP binding / protein binding / protein kinase/ protein serine/threonine kinase/ protein tyrosine kinase	0	kinase
Bra013339	40.4229	13.1502	-1.62009	6.13694e-66	6.54327e-65	XP_002867981.1	hypothetical protein ARALYDRAFT_492992	0	unkown funciton
Bra013360	37.8459	8.87708	-2.09198	1.00916e-57	9.95231e-57	XP_002870014.1	transducin family protein	0	small molecular
Bra013363	343.354	61.477	-2.48158	0	0	AAL25602.1	AT4g18950/F13C5_120	0	unkown funciton
Bra013369	7.70691	23.4134	1.60311	2.72004e-13	1.10988e-12	AAP03017.1	4-coumarate-CoA ligase-like protein	0	secondary metabolism
Bra013371	15.1633	7.42795	-1.02955	5.13812e-13	2.0068e-12	XP_002867959.1	hypothetical protein ARALYDRAFT_492951	0	unkown funciton
Bra013374	195.953	23.372	-3.06765	0	0	XP_002867953.1	early-responsive to dehydration 3	0	universal stress related
Bra013377	48.1413	13.3055	-1.85525	5.3142e-54	5.01769e-53	XP_002869998.1	binding protein	1.04379e-151	others
Bra013382	141.9	38.6116	-1.87777	2.10444e-66	2.25129e-65	XP_002862431.1	expressed protein	5.43216e-13	unkown funciton
Bra013385	97.6848	19.9325	-2.29301	9.36208e-189	1.88262e-187	CAA16710.1	RNase L inhibitor-like protein	0	DNA or RNA binding
Bra013392	39.9788	96.9209	1.27757	3.25962e-13	1.31178e-12	AAK55659.1	unknown	1.62381e-83	unkown funciton
Bra013395	24.9492	78.4686	1.65312	0	0	NP_193677.2	pectinacetylesterase family protein	0	cell wall
Bra013405	16.3549	5.60388	-1.54522	3.32932e-44	2.76359e-43	NP_193696.3	RNA binding / nucleic acid binding / nucleotide binding	0	DNA or RNA binding
Bra013425	28.5095	4.26392	-2.74119	1.59339e-107	2.34371e-106	XP_002869966.1	AK-HSDH/AK-HSDH II	0	others
Bra013431	30.5756	2.23499	-3.77404	0	0	XP_002889313.1	hypothetical protein ARALYDRAFT_477251	0	unkown funciton
Bra013433	28.8933	12.3271	-1.2289	6.4454e-31	4.33125e-30	XP_002893678.1	hypothetical protein ARALYDRAFT_336243	0	unkown funciton
Bra013450	164.575	626.323	1.92816	6.20592e-12	2.16064e-11	BAJ33888.1	unnamed protein product	6.502e-63	unkown funciton
Bra013456	16.6726	81.6566	2.29209	6.9944e-14	3.08881e-13	XP_002869939.1	CTP synthase	0	small molecular
Bra013458	36.2966	89.3183	1.29912	4.79616e-13	1.88152e-12	XP_002869935.1	chloroplast elongation factor tub	0	translation regulation
Bra013461	23.1985	6.44445	-1.8479	5.07628e-57	4.97089e-56	XP_002869932.1	transcription factor jumonji family protein	0	transcription regulation
Bra013475	9.37148	26.1351	1.47964	0	0	NP_193814.1	FAD-binding domain-containing protein	0	unkown funciton
Bra013476	43.1278	1723.24	5.32037	1.02274e-12	3.83638e-12	XP_002869924.1	FAD-binding domain-containing protein	0	oxidation reduction
Bra013477	31.4832	2.15728	-3.8673	9.94726e-229	2.17715e-227	XP_002867873.1	hypothetical protein ARALYDRAFT_492801	0	unkown funciton
Bra013481	59.0602	21.3495	-1.46799	1.13355e-49	1.01139e-48	XP_002869921.1	tubulin beta-9 chain	0	cytoskeleton
Bra013507	102.574	10.3631	-3.30713	0	0	NP_193847.2	HAP6 (HAPLESS 6); dolichyl-diphosphooligosaccharide-protein glycotransferase	0	others
Bra013510	26.5632	4.61496	-2.52504	1.57617e-66	1.68899e-65	XP_002869902.1	DNAJ heat shock N-terminal domain-containing protein	0	universal stress related
Bra013521	10.1494	27.5064	1.43837	6.0174e-14	2.67586e-13	XP_002867854.1	At4g21350	5.04694e-136	unkown funciton
Bra013550	66.6263	11.6246	-2.51891	2.95034e-292	7.07838e-291	XP_002867829.1	hypothetical protein ARALYDRAFT_492703	0	unkown funciton
Bra013562	62.7138	24.5377	-1.35378	4.2874e-40	3.35152e-39	NP_193911.1	QQT2 (quatre-quart2); ATP binding / nucleotide binding	7.19406e-146	Energy
Bra013576	9979.61	2016.08	-2.30743	0	0	ABU54828.1	peroxidase	0	signal transduction
Bra013578	77.7321	200.73	1.36867	1.803e-13	7.58368e-13	XP_002869850.1	predicted protein	2.82977e-59	unkown funciton
Bra013591	144.963	10.1546	-3.83548	0	0	XP_002869840.1	kinase	0	kinase
Bra013602	16.6783	74.5564	2.16036	2.72448e-13	1.11141e-12	AAK57562.1	plastid-lipid associated protein PAP2	1.3336e-155	lipid metabolism
Bra013606	187.238	444.481	1.24725	0	0	XP_002869830.1	hypothetical protein ARALYDRAFT_492639	0	unkown funciton
Bra013607	29.3761	111.215	1.92064	8.93952e-13	3.3751e-12	NP_193960.2	ubiquitin thiolesterase	0	protein degradation
Bra013611	46.1552	180.748	1.96941	1.96287e-13	8.21608e-13	NP_567660.1	ATCES1; catalytic/ hydrolase, acting on carbon-nitrogen (but not peptide) bonds, in linear amides	5.45129e-140	carbohydrate metabolism
Bra013612	16.5882	78.1083	2.23532	3.18634e-13	1.2852e-12	XP_002867775.1	hypothetical protein ARALYDRAFT_492631	0	unkown funciton
Bra013623	15.6863	86.0487	2.45564	0	0	NP_193984.1	embryo-abundant protein-related	2.56601e-124	universal stress related
Bra013634	10.3289	75.9621	2.87859	2.12052e-13	8.81585e-13	XP_002869812.1	hypothetical protein ARALYDRAFT_354499	0	unkown funciton
Bra013675	201.678	79.4299	-1.3443	3.815e-166	7.24714e-165	CAD91713.1	glutamate-cysteine ligase	0	Nitrogen metabolism
Bra013678	43.1306	17.2749	-1.32003	1.85365e-46	1.59334e-45	XP_002869784.1	hypothetical protein ARALYDRAFT_492546	0	unkown funciton
Bra013693	34.6636	105.063	1.59976	3.59934e-13	1.43762e-12	NP_001031702.1	hydroxyproline-rich glycoprotein family protein	2.28196e-102	universal stress related
Bra013697	34.9534	12.1404	-1.52562	7.4303e-35	5.36086e-34	XP_002869777.1	glycoside hydrolase family 28 protein	0	carbohydrate metabolism
Bra013718	45.753	16.9238	-1.43481	4.3509e-64	4.55981e-63	XP_002867698.1	hypothetical protein ARALYDRAFT_914233	0	unkown funciton
Bra013719	58.166	10.5695	-2.46026	5.85924e-111	8.78831e-110	ACC91261.1	putative calcium-dependent protein kinase	0	kinase
Bra013728	27.2293	9.07327	-1.58546	1.87659e-53	1.76095e-52	XP_002869766.1	hypothetical protein ARALYDRAFT_914223	0	unkown funciton
Bra013732	86.7017	36.181	-1.26083	1.90541e-41	1.52342e-40	ACQ76808.1	WRKY transcription factor 53	1.15068e-151	transcription regulation
Bra013734	8.40179	35.9063	2.09547	0	0	XP_002867688.1	glycoside hydrolase family 28 protein	0	carbohydrate metabolism
Bra013735	216.477	50.511	-2.09955	0	0	CAA64327.1	acyl-CoA synthetase	0	lipid metabolism
Bra013738	55.8715	150.991	1.43428	0	0	XP_002869760.1	hypothetical protein ARALYDRAFT_492480	1.70049e-32	unkown funciton
Bra013739	60.8319	232.639	1.9352	3.23296e-13	1.3017e-12	XP_002867686.1	hypothetical protein ARALYDRAFT_492479	4.8992e-43	unkown funciton
Bra013740	90.8105	276.87	1.60828	4.4964e-13	1.77286e-12	ABD38865.1	At4g23885	3.41301e-28	unkown funciton
Bra013744	4.33422	198.435	5.51675	1.99618e-13	8.34892e-13	XP_002869754.1	UDP-D-glucose/UDP-D-galactose 4-epimerase 2	0	carbohydrate metabolism
Bra013745	26.5624	55.6955	1.06818	1.25233e-13	5.38596e-13	XP_002867683.1	hypothetical protein ARALYDRAFT_492471	1.26359e-49	unkown funciton
Bra013762	25.9914	4.74296	-2.45418	6.73784e-65	7.11977e-64	NP_194141.2	protein kinase family protein	0	kinase
Bra013763	14.3853	529.904	5.20306	2.93098e-14	1.33918e-13	NP_194142.1	unknown protein	1.88177e-73	unkown funciton
Bra013774	344.184	25.5849	-3.74982	0	0	XP_002867677.1	hypothetical protein ARALYDRAFT_492441	0	unkown funciton
Bra013776	72.4189	164.086	1.18002	3.23296e-13	1.30154e-12	ACV88719.1	SLY1 F-box protein	7.71266e-76	protein degradation
Bra013783	35.4088	17.5923	-1.00916	5.10308e-17	2.561e-16	XP_002865966.1	hypothetical protein ARALYDRAFT_357572	3.72768e-101	unkown funciton
Bra013784	38.204	6.10954	-2.64459	1.91452e-123	3.06602e-122	AAL77677.1	AT4g24270/T22A6_100	0	unkown funciton
Bra013799	33.9344	10.9964	-1.62572	1.68353e-31	1.14238e-30	NP_194171.1	CIPK8 (CBL-INTERACTING PROTEIN KINASE 8); kinase/ protein kinase	0	kinase
Bra013811	23.6197	4.46568	-2.40304	7.94052e-59	7.91895e-58	XP_002867662.1	hypothetical protein ARALYDRAFT_492391	0	unkown funciton
Bra013817	15.5904	38.955	1.32116	1.65201e-13	6.99373e-13	NP_194190.2	unknown protein	3.80503e-75	unkown funciton
Bra013824	13.9433	2.87959	-2.27563	3.18864e-63	3.31887e-62	Q9SB63.2	MOS1_ARATH RecName: Full=Protein MODIFIER OF SNC1 1; AltName: Full=MODIFIER OF snc1, 1	0	others
Bra013825	91.3456	37.5492	-1.28256	5.41242e-97	7.43376e-96	XP_002869705.1	ubiquitin-associated /TS-N domain-containing protein	0	protein degradation
Bra013833	98.9448	7.95931	-3.63591	1.11894e-211	2.371e-210	XP_002867644.1	pectate lyase family protein	0	carbohydrate metabolism
Bra013837	25.4867	72.4199	1.50664	2.43138e-13	9.98601e-13	XP_002869702.1	hypothetical protein ARALYDRAFT_329184	6.81221e-105	unkown funciton
Bra013840	29.9762	3.40333	-3.13879	5.5665e-92	7.36046e-91	XP_002867640.1	hypothetical protein ARALYDRAFT_492352	0	unkown funciton
Bra013848	55.8438	26.5639	-1.07193	7.37134e-22	4.16249e-21	XP_002869699.1	sumo-activating enzyme 1A	1.70848e-158	others
Bra013865	29.4288	103.223	1.81047	5.5489e-13	2.15747e-12	CAA62760.1	PMSR protein	5.15143e-130	others
Bra013870	28.456	68.5137	1.26766	0	0	XP_002865076.1	zinc finger family protein	2.5685e-120	transcription regulation
Bra013887	54.6098	6.53801	-3.06224	6.70586e-115	1.02361e-113	XP_002867614.1	hypothetical protein ARALYDRAFT_492297	5.68953e-135	unkown funciton
Bra013909	45.575	203.754	2.16051	6.03074e-13	2.33091e-12	XP_002867599.1	hypothetical protein ARALYDRAFT_492259	4.99747e-74	unkown funciton
Bra013911	25.8923	57.0896	1.1407	0	0	XP_002867599.1	hypothetical protein ARALYDRAFT_492259	1.05157e-58	unkown funciton
Bra013912	7.23421	79.8004	3.46349	0	0	ACS45170.1	beta-carotene hydroxylase	3.90325e-140	secondary metabolism
Bra013945	13.5333	47.1673	1.80128	0	0	BAJ34574.1	unnamed protein product	0	unkown funciton
Bra013949	24.2687	9.97072	-1.28332	3.13758e-18	1.62861e-17	XP_002867580.1	hypothetical protein ARALYDRAFT_492204	0	unkown funciton
Bra013950	25.7848	11.6988	-1.14016	4.04522e-20	2.20927e-19	ABR21207.1	putative NPR1	0	transcription regulation
Bra013951	73.6452	31.2517	-1.23666	1.23282e-39	9.56222e-39	NP_568844.1	NAP1;3 (NUCLEOSOME ASSEMBLY PROTEIN 1;3); DNA binding	6.20634e-131	transcription regulation
Bra013955	129.684	26.7265	-2.27865	1.94128e-122	3.09336e-121	XP_002867579.1	hypothetical protein ARALYDRAFT_492200	3.65529e-74	unkown funciton
Bra013957	5.50177	59.5989	3.43732	0	0	NP_197272.2	MATE efflux family protein	0	transporter facilitation
Bra013973	18.3397	68.5772	1.90276	1.68532e-13	7.11774e-13	NP_197251.1	RGL3 (RGA-LIKE PROTEIN 3); transcription factor	0	transcription regulation
Bra013977	34.1058	11.7101	-1.54226	2.80584e-28	1.80062e-27	NP_568347.1	LUC7 N_terminus domain-containing protein	3.01871e-150	others
Bra013983	40.2048	178.455	2.15012	0	0	NP_197240.1	pyruvate decarboxylase family protein	0	carbohydrate metabolism
Bra014001	90.9357	32.3038	-1.49314	2.21762e-75	2.57416e-74	XP_002868327.1	hypothetical protein ARALYDRAFT_915517	0	unkown funciton
Bra014002	801.158	293.09	-1.45074	0	0	AAP92453.1	S-adenosyl-L-homocystein hydrolase	0	carbohydrate metabolism
Bra014011	122.533	56.3126	-1.12164	1.29383e-65	1.37674e-64	XP_002893943.1	predicted protein	0	unkown funciton
Bra014022	36.6948	7.79452	-2.23504	2.90692e-58	2.88282e-57	NP_175081.1	ALDH3H1 (ALDEHYDE DEHYDROGENASE 3H1); 3-chloroallyl aldehyde dehydrogenase/ aldehyde dehydrogenase (NAD)	0	carbohydrate metabolism
Bra014029	88.5582	8.43183	-3.39271	5.96138e-167	1.13651e-165	XP_002893995.1	nodulin MtN21 family protein	0	unkown funciton
Bra014043	30.7168	14.2633	-1.10672	1.50333e-22	8.62791e-22	XP_002891317.1	zinc finger family protein	9.14672e-157	transcription regulation
Bra014045	35.5649	5.51444	-2.68917	6.26898e-74	7.20357e-73	XP_002894013.1	remorin family protein	1.10816e-166	others
Bra014060	40.0247	16.1143	-1.31254	5.34684e-43	4.37909e-42	XP_002865797.1	hypothetical protein ARALYDRAFT_495103	0	unkown funciton
Bra014080	52.5506	128.271	1.28742	4.30544e-13	1.70472e-12	NP_564507.1	hydrolase	9.61936e-159	protein degradation
Bra014085	23.8045	58.1134	1.28764	3.17524e-14	1.44767e-13	XP_002894064.1	hypothetical protein ARALYDRAFT_891562	1.31315e-123	unkown funciton
Bra014086	35.1315	5.81775	-2.59423	9.50526e-63	9.85812e-62	XP_002894065.1	amino acid transporter family protein	0	transporter facilitation
Bra014125	102.49	386.751	1.91593	1.84541e-12	6.70797e-12	AAD49767.1	ESTs gb/R89965 come from this gene [Arabidopsis thaliana]	5.07384e-106	others
Bra014136	160.091	17.1051	-3.22639	0	0	BAJ34113.1	unnamed protein product	0	unkown funciton
Bra014154	1671.94	4923.48	1.55815	1.70701e-11	5.79524e-11	NP_564532.1	protease inhibitor/seed storage/lipid transfer protein (LTP) family protein	6.04618e-22	protein degradation
Bra014157	27.2529	10.7795	-1.33812	1.33327e-24	7.96842e-24	XP_002894133.1	mov34 family protein	0	others
Bra014162	128.726	23.4677	-2.45556	1.62754e-268	3.78806e-267	XP_002891463.1	hypothetical protein ARALYDRAFT_474037	2.58365e-66	unkown funciton
Bra014163	29.5528	8.9475	-1.72374	1.30062e-41	1.04222e-40	XP_002891464.1	zinc ion binding protein	0	transporter facilitation
Bra014208	279.828	10.2083	-4.77672	0	0	XP_002894215.1	hypothetical protein ARALYDRAFT_474107	1.40068e-160	unkown funciton
Bra014232	363.685	164.525	-1.14438	2.58504e-205	5.37773e-204	BAE99023.1	tubulin alpha-2/alpha-4 chain	0	cytoskeleton
Bra014238	43.252	11.2825	-1.93868	6.11144e-69	6.69261e-68	NP_175432.2	unknown protein	0	unkown funciton
Bra014246	39.0381	13.5857	-1.52279	1.10092e-27	6.99058e-27	Q9SX52.1	Phytochrome-associated serine/threonine protein phosphatase 1; Short=AtFyPP1	1.03977e-172	transcription regulation
Bra014266	8.78167	22.6804	1.36888	1.03917e-13	4.51418e-13	XP_002872983.1	zinc finger family protein	2.48604e-132	transcription regulation
Bra014278	22.0032	60.1617	1.45113	7.63834e-14	3.35601e-13	ABV89666.1	zinc finger an1-like family protein	1.20927e-68	transcription regulation
Bra014291	47.2931	4.31784	-3.45325	1.78885e-157	3.28484e-156	XP_002894325.1	hypothetical protein ARALYDRAFT_474272	0	unkown funciton
Bra014297	21.2988	290.317	3.76878	0	0	XP_002891653.1	hypothetical protein ARALYDRAFT_474287	5.05871e-59	unkown funciton
Bra014305	53.9601	20.4521	-1.39964	1.13638e-47	9.91203e-47	XP_002894348.1	hypothetical protein ARALYDRAFT_474319	0	unkown funciton
Bra014315	40.8453	9.01737	-2.17939	2.70134e-107	3.96242e-106	NP_175627.1	ATHB-15; DNA binding / transcription factor	0	transcription regulation
Bra014320	88.9303	43.5647	-1.02951	5.68748e-21	3.15529e-20	NP_175638.1	AtRABG3d (Arabidopsis Rab GTPase homolog G3d); GTP binding	6.95934e-115	small molecular
Bra014346	44.9108	18.9972	-1.24127	2.061e-18	1.07539e-17	AAK55661.1	unnamed protein product	5.71896e-79	unkown funciton
Bra014372	8.22854	30.1317	1.87257	0	0	XP_002894473.1	hypothetical protein ARALYDRAFT_474528	0	unkown funciton
Bra014390	213.402	68.7626	-1.63387	1.58531e-199	3.25555e-198	NP_191842.1	AUD1; UDP-glucuronate decarboxylase/ catalytic/ dTDP-glucose 4,6-dehydratase	0	carbohydrate metabolism
Bra014393	22.3451	47.9403	1.10128	0	0	NP_567132.4	AtATG18a	8.43992e-180	unkown funciton
Bra014396	37.9091	5.80511	-2.70715	8.1592e-71	9.11644e-70	XP_002876686.1	hypothetical protein ARALYDRAFT_907847	0	unkown funciton
Bra014401	17.9248	60.0588	1.74442	0	0	NP_191814.1	universal stress protein (USP) family protein	8.50224e-81	universal stress related
Bra014402	32.9766	5.23869	-2.65416	8.99646e-95	1.21679e-93	XP_002876670.1	agenet domain-containing protein	0	others
Bra014435	42.566	309.685	2.86303	1.54765e-13	6.57895e-13	NP_191705.1	BRH1 (BRASSINOSTEROID-RESPONSIVE RING-H2); protein binding/zinc ion binding	4.52214e-89	transporter facilitation
Bra014437	13.3255	40.1155	1.58997	0	0	XP_002876612.1	hypothetical protein ARALYDRAFT_486618	9.49054e-163	unkown funciton
Bra014462	32.8129	5.76693	-2.50839	1.13335e-61	1.16259e-60	XP_002882021.1	CYP76C2	8.44278e-164	oxidation reduction
Bra014473	163.952	47.7018	-1.78116	2.5145e-289	6.00565e-288	NP_567103.1	transketolase, putative	0	carbohydrate metabolism
Bra014487	40.9357	243.325	2.57145	0	0	XP_002876557.1	hypothetical protein ARALYDRAFT_486518	5.53284e-133	unkown funciton
Bra014497	21.0219	9.98304	-1.07434	1.1379e-19	6.14623e-19	XP_002878328.1	DNA binding protein	0	transcription regulation
Bra014505	52.7231	3.19669	-4.04378	0	0	BAJ34611.1	unnamed protein product	0	unkown funciton
Bra014509	20.5352	44.8439	1.12681	4.9256e-11	1.63468e-10	AAR24671.1	At3g60150	2.47377e-80	unkown funciton
Bra014523	210.622	92.176	-1.19219	7.06684e-126	1.14551e-124	XP_002876528.1	ATGDI2	0	others
Bra014529	46.0155	18.1107	-1.34528	9.56764e-33	6.64181e-32	NP_191535.2	OASC (O-ACETYLSERINE (THIOL) LYASE ISOFORM C); ATP binding / cysteine synthase	7.9991e-173	Energy
Bra014549	24.4315	4.17322	-2.54951	4.94128e-95	6.70305e-94	XP_002878255.1	protein transporter	0	transporter facilitation
Bra014555	26.0097	55.2055	1.08576	0	0	XP_002878236.1	predicted protein	1.10692e-85	unkown funciton
Bra014562	65.7397	23.0753	-1.51042	3.66738e-75	4.24929e-74	NP_191420.1	ketol-acid reductoisomerase	0	Nitrogen metabolism
Bra014567	46.248	108.003	1.2236	0	0	AAM63806.1	unknown	1.37608e-66	unkown funciton
Bra014569	45.5374	22.1669	-1.03864	7.70556e-17	3.84953e-16	NP_567066.1	PP2A-3 (PROTEIN PHOSPHATASE 2A-3); protein serine/threonine phosphatase	0	signal transduction
Bra014633	130.111	41.8944	-1.63491	1.33936e-123	2.146e-122	XP_002878144.1	hypothetical protein ARALYDRAFT_486171	0	unkown funciton
Bra014648	46.2404	12.588	-1.8771	7.22624e-57	7.05459e-56	NP_191264.1	CBL (cystathionine beta-lyase); cystathionine beta-lyase	0	Nitrogen metabolism
Bra014655	628.263	213.839	-1.55485	0	0	NP_191260.1	strictosidine synthase family protein	0	secondary metabolism
Bra014665	19.5148	76.889	1.97821	0	0	NP_191247.1	VQ motif-containing protein	5.25614e-51	others
Bra014696	17.3506	69.0391	1.99243	7.63834e-14	3.35417e-13	XP_002876363.1	hypothetical protein ARALYDRAFT_907078	6.93439e-77	unkown funciton
Bra014711	26.3406	68.9941	1.38919	1.00808e-13	4.3875e-13	NP_191164.1	protein kinase family protein	0	kinase
Bra014713	123.652	13.1597	-3.23208	0	0	NP_850984.4	ATP binding	0	Energy
Bra014732	23.8233	5.65443	-2.07492	1.17835e-51	1.08376e-50	AAK01361.1	AF314812_1 delta 1-pyrroline-5-carboxylate synthetase B	0	secondary metabolism
Bra014742	43.0139	14.4674	-1.572	5.98508e-32	4.1022e-31	Q8H186.1	Probable receptor-like protein kinase At3g55450; AltName: Full=BIK1-like protein kinase	5.61251e-158	kinase
Bra014751	212.864	660.291	1.63317	2.49134e-13	1.02139e-12	NP_567020.1	UBC14 (ubiquitin-conjugating enzyme 14); ubiquitin-protein ligase	4.16097e-78	protein degradation
Bra014756	16.2157	2.06226	-2.97509	7.89598e-101	1.10734e-99	XP_002878029.1	P-glycoprotein 20	0	others
Bra014790	23.5629	6.9574	-1.7599	5.12258e-41	4.06509e-40	NP_191036.1	dentin sialophosphoprotein-related	0	others
Bra014799	40.748	513.951	3.65683	1.74971e-12	6.37608e-12	NP_191029.1	sugar isomerase (SIS) domain-containing protein / CBS domain-containing protein	1.26294e-167	carbohydrate metabolism
Bra014816	49.4098	4.35781	-3.50312	7.0047e-278	1.652e-276	XP_002877978.1	hydrolase, hydrolyzing O-glycosyl compounds	0	carbohydrate metabolism
Bra014826	73.934	16.0157	-2.20675	1.11853e-182	2.22127e-181	XP_002877965.1	sucrose-phosphatase 3	0	carbohydrate metabolism
Bra014838	39.767	7.34706	-2.43633	4.96562e-82	6.11049e-81	XP_002877959.1	proton-dependent oligopeptide transport family protein	0	transporter facilitation
Bra014847	115.557	31.6508	-1.86829	5.28154e-146	9.28719e-145	XP_002876237.1	kinase family protein	0	kinase
Bra014848	81.8536	10.5467	-2.95625	2.95982e-109	4.40223e-108	NP_190970.1	phosphatidic acid phosphatase-related / PAP2-related	7.15042e-156	secondary metabolism
Bra014849	28.6292	4.01679	-2.83337	3.40424e-78	4.06688e-77	BAJ34026.1	unnamed protein product	0	unkown funciton
Bra014852	106.808	621.73	2.54127	4.79616e-13	1.88175e-12	XP_002877951.1	universal stress protein family protein	5.97594e-79	universal stress related
Bra014858	213.881	481.011	1.16926	0	0	NP_198122.4	structural constituent of ribosome	1.60241e-38	translation regulation
Bra014870	38.3628	16.6767	-1.20188	1.85121e-25	1.12685e-24	AAG32922.1	AF188639_1 HMG-CoA synthase	0	secondary metabolism
Bra014871	25.545	10.0665	-1.34349	3.41532e-36	2.51062e-35	ACB98704.1	phospholipase D gamma 1	0	signal transduction
Bra014875	84.9672	17.9665	-2.2416	2.44472e-132	4.08088e-131	NP_564353.1	CIPK23 (CBL-INTERACTING PROTEIN KINASE 23); kinase/ protein binding / protein serine/threonine kinase	0	kinase
Bra014880	19.5647	2.83443	-2.78712	1.74271e-79	2.10476e-78	XP_002890871.1	hypothetical protein ARALYDRAFT_473269	0	unkown funciton
Bra014903	33.8585	96.3892	1.50935	5.3757e-13	2.09344e-12	AAD21694.1	ESTs gb/H76323 and gb/Z25560 come from this gene [Arabidopsis thaliana]	1.95865e-130	unkown funciton
Bra014911	40.9563	14.1593	-1.53234	8.82416e-58	8.70503e-57	AAG60158.1	bystin, putative	1.97698e-180	oxidation reduction
Bra014915	71.6153	444.247	2.63302	0	0	AAM67024.1	unknown	5.29671e-26	unkown funciton
Bra014935	194.075	94.3377	-1.04071	3.51956e-43	2.88698e-42	XP_002883419.1	hypothetical protein ARALYDRAFT_898842	1.98332e-79	unkown funciton
Bra014955	329.478	751.946	1.19045	0	0	CAA72005.1	nodulin-35 homologue	4.24788e-148	unkown funciton
Bra014956	78.3595	161.117	1.03993	0	0	XP_002885567.1	hypothetical protein ARALYDRAFT_479859	1.96343e-83	unkown funciton
Bra014963	10.6045	4.65206	-1.18873	6.17272e-20	3.35455e-19	NP_189001.1	RFR1 (REF4-related 1)	0	others
Bra014964	16.6059	3.05093	-2.44437	2.0362e-57	1.99945e-56	XP_002883478.1	hypothetical protein ARALYDRAFT_479911	0	unkown funciton
Bra014981	20.8219	119.49	2.52071	0	0	NP_189022.1	SBP3 (selenium-binding protein 3); selenium binding	0	transporter facilitation
Bra014989	15.6449	5.87364	-1.41336	4.37518e-25	2.64407e-24	XP_002885603.1	hypothetical protein ARALYDRAFT_898933	4.16441e-159	unkown funciton
Bra015006	56.3776	23.7308	-1.24836	8.40362e-41	6.64898e-40	O04955.2	GSHRC_BRARP RecName: Full=Glutathione reductase, cytosolic; Short=GR; Short=GRase	0	oxidation reduction
Bra015013	49.6848	7.86441	-2.6594	2.7487e-123	4.3931e-122	XP_002865600.1	predicted protein	3.19662e-110	unkown funciton
Bra015036	46.7401	19.6676	-1.24884	1.24608e-24	7.45151e-24	XP_002880717.1	hypothetical protein ARALYDRAFT_481441	9.4314e-118	unkown funciton
Bra015047	125.159	40.3634	-1.63264	3.19264e-178	6.26617e-177	XP_002868566.1	hypothetical protein ARALYDRAFT_493781	0	unkown funciton
Bra015052	89.1667	40.1509	-1.15107	9.3082e-56	8.96107e-55	NP_566752.1	AAA-type ATPase family protein / ankyrin repeat family protein	0	Energy
Bra015053	259.74	52.9387	-2.29467	0	0	AAK21965.1	receptor protein kinase PERK1	0	kinase
Bra015090	12.7378	45.0983	1.82395	6.0174e-14	2.67326e-13	XP_002883567.1	hypothetical protein ARALYDRAFT_480003	1.85995e-100	unkown funciton
Bra015104	117.416	25.1137	-2.22509	4.31816e-214	9.19892e-213	XP_002863088.1	hypothetical protein ARALYDRAFT_497166	0	unkown funciton
Bra015116	5.19229	12.3417	1.2491	0	0	Q9LSF5.1	Pentatricopeptide repeat-containing protein At3g25210, mitochondrial; Flags: Precursor	1.40185e-164	others
Bra015135	421.478	106.626	-1.9829	0	0	Q9M462.1	Glucose-1-phosphate adenylyltransferase small subunit, chloroplastic	4.0097e-121	carbohydrate metabolism
Bra015145	93.6959	34.0395	-1.46078	1.14562e-96	1.56874e-95	XP_002885749.1	hypothetical protein ARALYDRAFT_899235	0	unkown funciton
Bra015146	7.81842	19.3044	1.30398	0	0	XP_002885750.1	hypothetical protein ARALYDRAFT_342773	0	unkown funciton
Bra015160	26.8005	3.32418	-3.01119	2.46312e-112	3.72242e-111	XP_002883682.1	ATVPS11	0	others
Bra015166	82.6107	16.8086	-2.29713	7.61496e-131	1.26059e-129	NP_178637.2	glycosyl hydrolase family 17 protein	0	carbohydrate metabolism
Bra015172	378.235	25.6125	-3.88436	0	0	XP_002885806.1	predicted protein	0	unkown funciton
Bra015174	157.907	18.1604	-3.12021	0	0	XP_002885808.1	hypothetical protein ARALYDRAFT_899389	0	unkown funciton
Bra015194	20.1277	9.04467	-1.15404	4.82602e-20	2.62895e-19	XP_002864105.1	binding protein	0	others
Bra015243	54.2773	10.1485	-2.41908	1.75376e-98	2.43597e-97	AAD41980.1	unknown protein	0	unkown funciton
Bra015252	50.4946	4045.37	6.324	7.63834e-14	3.35463e-13	BAJ34348.1	unnamed protein product	5.24906e-29	unkown funciton
Bra015260	24.0465	10.9441	-1.13568	4.86618e-23	2.8212e-22	NP_171870.4	ATP binding / kinase/ protein kinase/ protein serine/threonine kinase	0	kinase
Bra015269	101.506	37.4376	-1.439	2.80594e-41	2.24117e-40	XP_002892181.1	hypothetical protein ARALYDRAFT_887539	3.26134e-68	unkown funciton
Bra015276	91.3187	36.0174	-1.34222	1.50611e-79	1.82108e-78	NP_564859.2	SMP1 (SWELLMAP 1); nucleic acid binding / single-stranded RNA binding	0	DNA or RNA binding
Bra015281	19.7343	43.7762	1.14944	5.34462e-13	2.08261e-12	NP_171893.1	GBF4; DNA binding /sequence-specific DNA binding / transcription factor	9.38061e-77	transcription regulation
Bra015289	12.5914	37.3385	1.56823	0	0	XP_002889491.1	indoleacetic acid-induced protein 10	1.67117e-73	signal transduction
Bra015291	23.0366	7.10747	-1.69652	2.55128e-79	3.0755e-78	XP_002892198.1	ATMRP5	0	transporter facilitation
Bra015302	31.4456	6.47772	-2.2793	9.85594e-111	1.47553e-109	XP_002892207.1	hypothetical protein ARALYDRAFT_470409	0	unkown funciton
Bra015316	339.695	12.7681	-4.73363	0	0	AAM61029.1	ankyrin-like protein	0	cytoskeleton
Bra015317	64.7911	28.9934	-1.16007	1.75091e-39	1.35609e-38	XP_002889505.1	hypothetical protein ARALYDRAFT_887609	0	unkown funciton
Bra015322	43.8748	12.3879	-1.82446	2.87272e-58	2.84978e-57	XP_002889510.1	transducin family protein	0	small molecular
Bra015335	30.8114	13.9331	-1.14495	1.8651e-19	1.00232e-18	NP_171956.2	coenzyme F420 hydrogenase family / dehydrogenase, beta subunit family	0	others
Bra015344	24.8828	2.61632	-3.24953	3.89054e-193	7.87304e-192	NP_171966.1	AAA-type ATPase family protein	0	Energy
Bra015346	10.7266	134.267	3.64584	0	0	NP_171969.2	male sterility MS5 family protein	1.07534e-148	unkown funciton
Bra015363	57.2711	17.4132	-1.71763	3.07876e-60	3.11219e-59	Q8W486.1	Y1491_ARATH RecName: Full=DUF246 domain-containing protein At1g04910	0	others
Bra015388	21.4475	70.9744	1.72649	3.4106e-13	1.36531e-12	XP_002889536.1	MAPKKK18	4.32065e-168	kinase
Bra015393	52.7225	13.3701	-1.97941	3.7785e-119	5.91175e-118	NP_172007.1	calcium-binding EF hand family protein	0	small molecular
Bra015395	33.8207	5.94618	-2.50787	2.34814e-54	2.22766e-53	XP_002892271.1	galactosyltransferase family protein	0	others
Bra015419	39.6395	1277.41	5.01014	0	0	XP_002892283.1	hypothetical protein ARALYDRAFT_470534	7.72771e-09	unkown funciton
Bra015420	35.4432	15.0672	-1.2341	5.74148e-23	3.31962e-22	O23034.2	UBA5_ARATH RecName: Full=Ubiquitin-like modifier-activating enzyme 5; Short=Ubiquitin-activating enzyme 5	0	protein degradation
Bra015427	20.5889	3.57179	-2.52715	7.72496e-78	9.18396e-77	AAK40099.1	AF339908_1 RNA helicase SDE3	0	unkown funciton
Bra015431	61.9735	20.0902	-1.62516	1.10833e-74	1.27908e-73	XP_002889551.1	plant synaptotagmin	0	others
Bra015436	66.5747	4.53792	-3.87487	0	0	NP_563743.2	1,3-beta-glucan synthase/ transferase, transferring glycosyl groups	1.86137e-174	carbohydrate metabolism
Bra015463	41.6619	7.51792	-2.47032	3.00702e-85	3.7879e-84	XP_002889573.1	hypothetical protein ARALYDRAFT_470601	0	unkown funciton
Bra015464	14.4356	5.10964	-1.49834	2.54738e-34	1.81656e-33	XP_002889576.1	hypothetical protein ARALYDRAFT_470606	0	unkown funciton
Bra015467	26.8107	54.3886	1.0205	0	0	ABL97975.1	unknown	4.95271e-91	unkown funciton
Bra015471	36.3836	11.4732	-1.66503	9.1144e-33	6.33406e-32	XP_002892318.1	hypothetical protein ARALYDRAFT_887800	1.57826e-111	unkown funciton
Bra015481	74.1149	188.082	1.34353	0	0	NP_172108.1	ATMYB13 (MYB DOMAIN PROTEIN 13); DNA binding /transcription factor	3.87465e-90	transcription regulation
Bra015491	21.4053	6.99383	-1.61381	8.665e-32	5.92504e-31	AAF73843.1	AF207994_1 acyl-CoA oxidase ACX3	0	lipid metabolism
Bra015499	10.296	22.425	1.12303	3.22852e-13	1.30057e-12	BAJ33891.1	unnamed protein product	0	unkown funciton
Bra015501	235.103	103.319	-1.18619	2.06614e-82	2.55432e-81	ABV89635.1	peroxisomal small heat shock protein ACD31.2	1.06559e-138	universal stress related
Bra015511	11.5062	90.0173	2.9678	0	0	ABI63586.1	4-hydroxyphenylpyruvate dioxygenase	0	carbohydrate metabolism
Bra015531	54.2991	129.963	1.2591	2.12496e-13	8.82742e-13	ACJ76846.1	chloroplast lipase protein	0	lipid metabolism
Bra015535	86.6635	37.7508	-1.19892	5.64182e-43	4.61949e-42	NP_172172.2	transporter-related	4.20803e-161	transporter facilitation
Bra015538	18.3921	2.83412	-2.69811	1.23349e-74	1.42251e-73	XP_002892369.1	ATTIC110/TIC110	0	others
Bra015547	59.998	236.053	1.97612	1.00209e-12	3.76245e-12	BAJ33999.1	unnamed protein product	1.58501e-163	unkown funciton
Bra015563	30.2359	8.32181	-1.86129	2.4932e-40	1.95808e-39	XP_002892388.1	hypothetical protein ARALYDRAFT_887933	0	unkown funciton
Bra015567	9.55328	22.8955	1.261	0	0	XP_002889637.1	UDP-glucoronosyl/UDP-glucosyl transferase family protein	0	carbohydrate metabolism
Bra015573	11.8621	37.073	1.64401	6.0174e-14	2.67251e-13	XP_002892394.1	C2 domain-containing protein	1.94367e-122	transcription regulation
Bra015580	29.93	80.1744	1.42155	0	0	XP_002892399.1	hypothetical protein ARALYDRAFT_470766	4.5195e-132	unkown funciton
Bra015599	17.7661	156.205	3.13624	1.9984e-13	8.34401e-13	NP_175220.2	HXK3 (HEXOKINASE 3); ATP binding / fructokinase/ glucokinase/ hexokinase	0	kinase
Bra015605	29.2955	11.9284	-1.29627	2.58456e-18	1.34484e-17	XP_002871987.1	predicted protein	4.93183e-155	unkown funciton
Bra015607	763.547	333.056	-1.19695	0	0	3LE2	A Chain A, Structure Of Arabidopsis Atserpin1. Native Stressed Conforma	0	universal stress related
Bra015608	51.2858	25.4435	-1.01126	2.91984e-22	1.66618e-21	XP_002891379.1	hypothetical protein ARALYDRAFT_473912	6.53317e-174	unkown funciton
Bra015612	50.4907	4.71981	-3.41922	3.23204e-280	7.64509e-279	XP_002891366.1	hypothetical protein ARALYDRAFT_473899	0	unkown funciton
Bra015613	31.012	12.817	-1.27477	9.116e-24	5.37484e-23	XP_002891365.1	hypothetical protein ARALYDRAFT_473896	0	unkown funciton
Bra015621	40.273	10.5144	-1.93745	3.18354e-48	2.79901e-47	XP_002891347.1	3beta-hydroxysteroid-dehydrogenase/decarboxylase isoform 1	0	lipid metabolism
Bra015630	13.9157	106.586	2.93723	0	0	XP_002887721.1	F-box family protein	1.45257e-125	protein degradation
Bra015634	173.325	431.375	1.31547	2.21246e-12	8.00844e-12	BAJ34031.1	unnamed protein product	1.43638e-136	unkown funciton
Bra015635	20.7159	101.128	2.28737	2.35812e-13	9.72766e-13	AAK50091.1	AF372951_1 At1g78070/F28K19_28	0	unkown funciton
Bra015636	19.5335	4.71873	-2.04948	8.1662e-45	6.84619e-44	XP_002889174.1	glycosyl hydrolase family 3 protein	0	carbohydrate metabolism
Bra015637	15.6148	81.0326	2.37559	2.2804e-13	9.43753e-13	XP_002887715.1	phosphoglycerate/bisphosphoglycerate mutase family protein	1.09979e-136	carbohydrate metabolism
Bra015651	9.54826	21.0478	1.14036	2.16716e-13	8.99103e-13	XP_002887703.1	hypothetical protein ARALYDRAFT_895674	0	unkown funciton
Bra015656	61.9497	1787.6	4.85078	6.04716e-12	2.1072e-11	P39867.1	NIA1_BRANA RecName: Full=Nitrate reductase	0	oxidation reduction
Bra015665	311.594	104.548	-1.57551	0	0	ABB17025.1	protein disulfide isomerase	0	others
Bra015678	16.1121	1.95382	-3.04377	7.14312e-121	1.12587e-119	NP_177854.6	EFS (EARLY FLOWERING IN SHORT DAYS); histone methyltransferase(H3-K36 specific) / histone methyltransferase(H3-K4 specific)	0	DNA or RNA binding
Bra015681	26.3856	6.07066	-2.11983	6.35702e-53	5.93564e-52	NP_565153.1	dehydration-responsive protein-related	0	universal stress related
Bra015687	292.411	85.2597	-1.77806	0	0	XP_002889128.1	hypothetical protein ARALYDRAFT_476882	0	unkown funciton
Bra015693	1561.31	25289.7	4.01772	0	0	AAF23532.1	AF110434_1 alcohol dehydrogenase	0	carbohydrate metabolism
Bra015708	13.5667	2.93199	-2.21011	1.34591e-47	1.17173e-46	XP_002887663.1	zinc finger protein	0	transcription regulation
Bra015711	282.709	93.0949	-1.60255	6.69928e-273	1.56839e-271	BAJ34070.1	unnamed protein product	0	unkown funciton
Bra015725	73.4834	28.1778	-1.38286	3.08182e-44	2.56214e-43	BAJ33722.1	unnamed protein product	4.53118e-160	unkown funciton
Bra015731	32.4812	400.397	3.62375	5.89972e-13	2.28331e-12	BAJ34232.1	unnamed protein product	4.69297e-127	unkown funciton
Bra015734	50.1074	1872.96	5.22415	1.38445e-12	5.10798e-12	XP_002889091.1	hypothetical protein ARALYDRAFT_476813	0	unkown funciton
Bra015753	87.2403	8.37211	-3.38133	6.11436e-266	1.41485e-264	NP_177766.1	ribophorin I family protein	0	others
Bra015771	24.7645	10.756	-1.20313	5.09706e-21	2.83118e-20	XP_002889072.1	hypothetical protein ARALYDRAFT_476779	0	unkown funciton
Bra015781	32.2265	10.7421	-1.58497	3.96216e-37	2.95064e-36	XP_002889063.1	hypothetical protein ARALYDRAFT_895494	0	unkown funciton
Bra015783	31.3662	10.2939	-1.60742	3.54408e-54	3.35825e-53	NP_177741.3	serine-type endopeptidase/ serine-type peptidase	0	protein degradation
Bra015792	23.8439	78.6864	1.72249	0	0	XP_002889054.1	EMB1793	9.13431e-74	others
Bra015797	87.7224	19.6053	-2.1617	3.56996e-133	5.98737e-132	AAC36485.1	nucleotide-binding subunit of vacuolar ATPase	0	Energy
Bra015806	19.3213	5.41785	-1.8344	1.93441e-40	1.52147e-39	XP_002889047.1	hypothetical protein ARALYDRAFT_895460	0	unkown funciton
Bra015812	79.5082	20.8814	-1.92888	3.60084e-162	6.75195e-161	ADD64789.1	CLAVATA1	0	others
Bra015815	164.808	69.9638	-1.23611	3.28662e-105	4.73822e-104	XP_002889044.1	tubulin beta-1 chain	0	cytoskeleton
Bra015827	29.7837	5.14039	-2.53457	9.9164e-60	9.97356e-59	XP_002889037.1	hypothetical protein ARALYDRAFT_895440	0	unkown funciton
Bra015828	24.8886	4.99807	-2.31604	6.42844e-86	8.1331e-85	NP_565114.1	XRN3; 5'-3' exoribonuclease	0	others
Bra015833	45.526	130.442	1.51865	0	0	AAM61596.1	DNA-binding protein	9.47958e-110	transcription regulation
Bra015835	141.284	52.613	-1.42511	7.88056e-81	9.61965e-80	XP_002887603.1	zinc finger (B-box type) family protein	1.18552e-135	transcription regulation
Bra015839	104.844	43.4386	-1.27119	1.97002e-61	2.01501e-60	NP_565111.1	nodulin MtN21 family protein	0	unkown funciton
Bra015850	40.8822	119.201	1.54386	0	0	XP_002887588.1	EMB2184	2.4738e-61	others
Bra015851	7.72523	21.6138	1.4843	0	0	NP_565108.2	zinc finger (CCCH-type) family protein	6.99868e-115	transcription regulation
Bra015860	55.1339	6.31192	-3.12679	1.96873e-164	3.71557e-163	XP_002889015.1	flavodoxin family protein	0	secondary metabolism
Bra015862	12.3615	34.4354	1.47804	1.03917e-13	4.51664e-13	AAM62602.1	unknown	9.04052e-125	unkown funciton
Bra015874	112.29	49.5174	-1.18123	1.65695e-37	1.2438e-36	XP_002887572.1	hypothetical protein ARALYDRAFT_316436	2.20894e-103	unkown funciton
Bra015878	23.4247	73.924	1.65801	5.26246e-14	2.35128e-13	NP_177635.1	RPS9 (RIBOSOMAL PROTEIN S9); structural constituent of ribosome	7.91706e-85	translation regulation
Bra015879	39.5782	5.4821	-2.8519	1.30431e-91	1.71897e-90	AAL91174.1	putative 3-ketoacyl-ACP synthase	0	lipid metabolism
Bra015880	184.933	424.594	1.19908	6.2803e-12	2.1851e-11	BAJ33919.1	unnamed protein product	3.60763e-77	unkown funciton
Bra015881	59.9878	471.405	2.97423	1.13709e-12	4.24042e-12	XP_002887567.1	hypothetical protein ARALYDRAFT_895362	1.02632e-87	unkown funciton
Bra015883	44.3962	18.5044	-1.26257	2.64562e-28	1.69848e-27	NP_177629.1	ADP-glucose pyrophosphorylase family protein	0	carbohydrate metabolism
Bra015896	10.9048	22.9685	1.07469	1.31894e-13	5.64809e-13	BAJ33607.1	unnamed protein product	0	unkown funciton
Bra015915	67.5727	9.86641	-2.77584	2.18564e-127	3.56638e-126	XP_002887538.1	galactosyl transferase GMA12/MNN10 family protein	0	carbohydrate metabolism
Bra015951	10.5591	1.69822	-2.6364	2.58412e-58	2.56429e-57	XP_002888954.1	membrane alanyl aminopeptidase	0	protein degradation
Bra015954	72.6336	25.7287	-1.49726	6.77586e-97	9.30239e-96	NP_565075.1	lipase family protein	0	lipid metabolism
Bra015958	23.3724	4.85609	-2.26694	3.48244e-48	3.05844e-47	AAG52080.1	AC012679_18 unknown protein; 95319-98330	0	unkown funciton
Bra015969	39.6798	122.735	1.62907	4.48974e-13	1.77176e-12	NP_177515.1	glycosyl transferase family 28 protein	0	carbohydrate metabolism
Bra015971	30.0982	10.4107	-1.53161	1.67506e-31	1.13687e-30	XP_002887501.1	transducin family protein	0	small molecular
Bra015983	26.0967	7.49641	-1.7996	9.02554e-41	7.13751e-40	XP_002887490.1	pin-formed 1	0	others
Bra015991	29.2676	3.68055	-2.99131	1.75314e-102	2.48372e-101	XP_002887484.1	hypothetical protein ARALYDRAFT_895203	0	unkown funciton
Bra015994	40.2525	13.2369	-1.60452	3.57398e-40	2.79588e-39	XP_002888928.1	hypothetical protein ARALYDRAFT_895200	0	unkown funciton
Bra016009	9.9442	46.1891	2.21562	0	0	XP_002888916.1	hypothetical protein ARALYDRAFT_476456	0	unkown funciton
Bra016011	35.1185	7.73	-2.18369	2.50076e-60	2.53032e-59	NP_565059.2	AtOCT1 (Arabidopsis thaliana ORGANIC CATION/CARNITINE TRANSPORTER1); carbohydrate transmembrane transporter/ carnitine transporter/ transporter	0	transporter facilitation
Bra016013	35.8958	17.1579	-1.06494	2.43176e-31	1.64485e-30	XP_002888912.1	hypothetical protein ARALYDRAFT_895179	0	unkown funciton
Bra016039	101.606	26.3033	-1.94968	4.52458e-129	7.45528e-128	XP_002887448.1	hypothetical protein ARALYDRAFT_476408	0	unkown funciton
Bra016046	43.4421	124.355	1.5173	4.10782e-14	1.8559e-13	NP_565044.1	ELF4-L2 (ELF4-Like 2)	3.58361e-54	transcription regulation
Bra016050	6.31425	12.9779	1.03937	3.9383e-08	1.11284e-07	XP_002888882.1	predicted protein	0	unkown funciton
Bra016053	40.9444	4.16366	-3.29774	1.4397e-150	2.56981e-149	XP_002888881.1	hypothetical protein ARALYDRAFT_476383	0	unkown funciton
Bra016056	272.639	61.7643	-2.14215	7.97066e-229	1.74573e-227	NP_565043.1	JAZ6 (JASMONATE-ZIM-DOMAIN PROTEIN 6)	3.40995e-98	others
Bra016063	13.9304	40.1282	1.52637	0	0	NP_001117587.1	ethylene-responsive element-binding protein, putative	2.12989e-56	signal transduction
Bra016078	36.7177	114.605	1.64212	3.18634e-13	1.28536e-12	NP_177368.1	plastocyanin-like domain-containing protein	1.23788e-49	oxidation reduction
Bra016086	20.5398	8.61171	-1.25405	1.37318e-19	7.39953e-19	XP_002887411.1	radical SAM domain-containing protein	0	carbohydrate metabolism
Bra016093	36.4332	572.287	3.97341	7.11876e-13	2.72211e-12	NP_177343.2	protease-associated zinc finger (C3HC4-type RING finger) family protein	3.7967e-160	transcription regulation
Bra016113	22.358	6.73939	-1.7301	2.54204e-39	1.96027e-38	AAF43235.1	AC012654_19 EST gb	0	unkown funciton
Bra016126	67.5265	10.0925	-2.74217	7.34904e-96	9.9905e-95	XP_002887383.1	hypothetical protein ARALYDRAFT_895010	1.26248e-178	unkown funciton
Bra016127	25.6313	437.641	4.09377	6.95888e-13	2.66512e-12	BAJ33705.1	unnamed protein product	0	unkown funciton
Bra016131	34.7866	227.283	2.70788	1.02784e-12	3.85417e-12	XP_002887380.1	hypothetical protein ARALYDRAFT_316133	6.11402e-120	unkown funciton
Bra016134	15.489	49.9298	1.68866	6.03074e-13	2.33119e-12	NP_565018.1	Rieske (2Fe-2S) domain-containing protein	3.52567e-105	others
Bra016144	183.105	14.7735	-3.63159	0	0	XP_002888833.1	hypothetical protein ARALYDRAFT_339371	8.25634e-171	unkown funciton
Bra016146	25.7433	9.96236	-1.36964	4.56198e-27	2.86654e-26	XP_002888832.1	eukaryotic translation initiation factor SUI1 family protein	0	translation regulation
Bra016147	68.7367	9.60737	-2.83887	1.0461e-151	1.88303e-150	NP_851080.1	SHM2 (SERINE HYDROXYMETHYLTRANSFERASE 2); catalytic/ glycine hydroxymethyltransferase/ pyridoxal phosphate binding	0	carbohydrate metabolism
Bra016149	36.229	5.24821	-2.78725	1.09608e-106	1.60041e-105	XP_002887359.1	hypothetical protein ARALYDRAFT_476259	0	unkown funciton
Bra016154	48.5905	1.67946	-4.8546	0	0	XP_002887355.1	UDP-glucose:glycoprotein glucosyltransferase	0	others
Bra016159	7.2592	32.0708	2.14338	1.88516e-13	7.90736e-13	NP_565011.1	auxin efflux carrier family protein	0	signal transduction
Bra016161	32.9038	14.4824	-1.18396	7.70638e-19	4.06824e-18	XP_002888820.1	glycosyltransferase family 14 protein	0	others
Bra016163	90.4837	26.0225	-1.7979	9.06256e-120	1.42069e-118	NP_565008.1	LPR2 (Low Phosphate Root2); copper ion binding / oxidoreductase	0	transporter facilitation
Bra016165	36.2653	14.5448	-1.31809	2.56508e-36	1.88952e-35	XP_002888814.1	armadillo/beta-catenin repeat family protein	0	signal transduction
Bra016169	16.2123	414.449	4.67603	0	0	NP_177256.4	heat shock protein binding	1.01073e-71	universal stress related
Bra016171	30.8862	115.437	1.90207	0	0				no homology
Bra016187	304.864	110.767	-1.46064	2.75762e-74	3.17559e-73	XP_002888795.1	hypothetical protein ARALYDRAFT_894896	7.21743e-55	unkown funciton
Bra016190	46.5091	3.26313	-3.83318	5.73192e-222	1.23841e-220	XP_002888793.1	hypothetical protein ARALYDRAFT_894893	3.50907e-174	unkown funciton
Bra016191	53.7545	9.18382	-2.54922	2.20784e-87	2.82917e-86	NP_177231.2	protein kinase family protein	0	kinase
Bra016192	131.8	13.3955	-3.29852	0	0	NP_177228.1	cellulase/ hydrolase, hydrolyzing O-glycosyl compounds	1.18167e-133	cell wall
Bra016198	4.88368	11.8203	1.27522	1.43885e-13	6.13524e-13	XP_002887318.1	hypothetical protein ARALYDRAFT_476193	0	unkown funciton
Bra016200	29.3629	59.6719	1.02306	2.00728e-13	8.3767e-13	XP_002887314.1	F-box family protein	4.98763e-159	protein degradation
Bra016206	20.0307	52.0093	1.37656	8.79518e-13	3.32335e-12	NP_177210.1	protein kinase family protein	0	kinase
Bra016207	11.1064	22.3293	1.00754	1.77636e-13	7.47751e-13	NP_177209.1	protein kinase family protein	0	kinase
Bra016237	103.385	48.5642	-1.09006	2.09414e-47	1.82213e-46	NP_564983.1	LGT8 (GLUCOSYL TRANSFERASE FAMILY 8); polygalacturonate 4-alpha-galacturonosyltransferase/ transferase	0	carbohydrate metabolism
Bra016241	16.9251	3.66498	-2.20729	2.37024e-70	2.63632e-69	XP_002887272.1	paired amphipathic helix repeat-containing protein	0	others
Bra016261	20.5849	49.7249	1.27238	7.21644e-14	3.18027e-13	NP_177142.1	band 7 family protein	9.86684e-144	others
Bra016263	8.8784	57.2773	2.68959	0	0	NP_001077801.1	CBS domain-containing protein	1.05064e-179	unkown funciton
Bra016291	68.606	32.5485	-1.07575	2.2211e-58	2.20611e-57	XP_002890627.1	ATCUL3/ATCUL3A/CUL3/CUL3A	0	protein degradation
Bra016293	163.828	27.7535	-2.56143	0	0	XP_002893375.1	dehydration-responsive family protein	0	universal stress related
Bra016328	9.91854	102.665	3.37167	5.00488e-13	1.95907e-12	NP_173799.1	ATTPS9; transferase, transferring glycosyl groups / trehalose-phosphatase	0	others
Bra016330	93.4195	11.1475	-3.06701	1.57305e-227	3.4335e-226	NP_564204.1	ALDH2B7; 3-chloroallyl aldehyde dehydrogenase/ aldehyde dehydrogenase (NAD)	0	carbohydrate metabolism
Bra016353	27.5275	10.6927	-1.36424	3.95806e-23	2.30056e-22	XP_002893277.1	alanine-2-oxoglutarate aminotransferase 1	0	Nitrogen metabolism
Bra016373	23.4082	5.76003	-2.02286	6.31444e-62	6.49401e-61	XP_002893241.1	hypothetical protein ARALYDRAFT_472501	0	unkown funciton
Bra016375	7.9307	30.1397	1.92615	0	0	XP_002893239.1	predicted protein	0	unkown funciton
Bra016376	29.5112	89.637	1.60283	4.88498e-15	2.31821e-14	NP_001154357.1	unknown protein	4.14691e-29	unkown funciton
Bra016383	21.5073	45.496	1.08092	2.30704e-13	9.53913e-13	XP_002890508.1	hypothetical protein ARALYDRAFT_472467	2.8397e-148	unkown funciton
Bra016396	53.5861	17.57	-1.60874	2.43514e-83	3.02691e-82	XP_002890482.1	ATPIP5K1	0	Energy
Bra016399	9.26724	60.3597	2.70337	7.63834e-14	3.35555e-13	XP_002893189.1	hypothetical protein ARALYDRAFT_472428	1.16549e-163	unkown funciton
Bra016405	436.407	93.3079	-2.2256	0	0	NP_173594.1	ATPDIL1-1 (PDI-LIKE 1-1); protein disulfide isomerase	0	Energy
Bra016413	17.4344	1.95669	-3.15545	1.76668e-93	2.36146e-92	NP_173582.2	calcium-binding EF hand family protein	0	small molecular
Bra016422	29.4273	79.3908	1.43182	6.18394e-13	2.38665e-12	NP_564139.1	SKP2A	0	others
Bra016434	90.8384	32.5968	-1.47857	9.36714e-64	9.78159e-63	AAW50121.1	DnaJ-like protein	0	DNA or RNA binding
Bra016440	30.6376	190.769	2.63845	2.79998e-13	1.13929e-12				no homology
Bra016441	33.1022	91.4995	1.46684	0	0	XP_002890421.1	zinc-binding family protein	1.0496e-137	transporter facilitation
Bra016448	39.9645	6.98492	-2.5164	4.0669e-108	6.00964e-107	NP_173508.1	TMT1 (TONOPLAST MONOSACCHARIDE TRANSPORTER1); carbohydrate transmembrane transporter/ nucleoside transmembrane transporter/ sugar:hydrogen symporter	0	transporter facilitation
Bra016455	184.86	66.0497	-1.48481	0	0	NP_173499.1	calcium-binding EF hand family protein	0	small molecular
Bra016459	289.804	18.3807	-3.97882	0	0	AAB53101.2	catalase	0	oxidation reduction
Bra016471	10.3962	184.131	4.14661	0	0	NP_564109.1	oxidoreductase, 2OG-Fe(II) oxygenase family protein	3.3633e-139	oxidation reduction
Bra016486	78.6002	30.3496	-1.37285	3.52622e-42	2.85649e-41	XP_002890359.1	abscisic acid-responsive HVA22 family protein	1.18281e-100	signal transduction
Bra016487	80.6003	19.5574	-2.04307	3.52318e-101	4.95402e-100	AAF13064.1	AF195511_1 ATP sulfurylase precursor	0	Energy
Bra016488	133.59	305.115	1.19154	0	0	XP_002513751.1	vacuolar ATP synthase proteolipid subunit 1, 2, 3, putative	1.79145e-57	Energy
Bra016494	42.921	2.56369	-4.06539	8.75558e-222	1.88913e-220	XP_002893071.1	hypothetical protein ARALYDRAFT_335233	0	unkown funciton
Bra016496	24.7285	4.64747	-2.41166	4.4783e-52	4.14269e-51	XP_002893063.1	jacalin lectin family protein	0	others
Bra016497	8.65897	24.4657	1.4985	4.88498e-15	2.31855e-14	BAJ33686.1	unnamed protein product	2.54205e-160	unkown funciton
Bra016512	63.4862	28.7281	-1.14398	1.88494e-29	1.23699e-28	NP_564077.1	PARVUS (PARVUS); polygalacturonate 4-alpha-galacturonosyltransferase/transferase, transferring glycosyl groups/ transferase, transferring hexosyl groups	4.92683e-162	carbohydrate metabolism
Bra016520	226.677	41.419	-2.45227	2.57816e-211	5.45944e-210	NP_564075.1	JAZ1 (JASMONATE-ZIM-DOMAIN PROTEIN 1); protein binding	4.98387e-88	others
Bra016521	38.7094	93.6707	1.27492	0	0	NP_173351.1	glycoside hydrolase family 28 protein / polygalacturonase (pectinase) family protein	0	carbohydrate metabolism
Bra016526	17.1517	123.542	2.84857	2.93098e-14	1.34052e-13	XP_002893028.1	hypothetical protein ARALYDRAFT_889335	6.20671e-87	unkown funciton
Bra016530	112.756	413.055	1.87313	9.76996e-15	4.5712e-14	BAJ34162.1	unnamed protein product	3.21771e-82	unkown funciton
Bra016536	36.2895	7.59913	-2.25565	1.20332e-80	1.46551e-79	BAF81526.1	calmodulin binding protein IQ	0	signal transduction
Bra016541	364.346	149.957	-1.28076	1.9694e-128	3.23003e-127	AAF27100.1	Putative phospatase 2A inhibitor	2.34683e-99	signal transduction
Bra016561	96.1082	12.013	-3.00006	1.36797e-92	1.81711e-91	XP_002890268.1	hypothetical protein ARALYDRAFT_312784	3.59672e-101	unkown funciton
Bra016564	489.591	45.7774	-3.41887	0	0	Q9LE22.1	Probable calcium-binding protein CML27;	4.21183e-157	small molecular
Bra016588	24.3283	3.20019	-2.9264	2.11128e-77	2.49794e-76	XP_002892966.1	cleavage stimulation factor 77	0	others
Bra016589	59.0998	6.19342	-3.25435	3.45598e-176	6.74571e-175	NP_564034.1	phosphoglycerate dehydrogenase	1.18167e-133	carbohydrate metabolism
Bra016590	34.7242	5.74563	-2.5954	7.7588e-65	8.19047e-64	NP_849681.1	ATB BETA; nucleotide binding / protein phosphatase type 2A regulator	0	transcription regulation
Bra016593	159.587	44.6116	-1.83885	7.53346e-106	1.0915e-104	XP_002890239.1	hypothetical protein ARALYDRAFT_471972	6.8632e-69	unkown funciton
Bra016604	133.013	22.615	-2.55622	4.87858e-136	8.2954e-135	NP_564019.1	JAZ5 (JASMONATE-ZIM-DOMAIN PROTEIN 5)	2.02473e-79	others
Bra016607	17.3976	2023.94	6.86214	0	0	XP_002890217.1	alanine aminotransferase	0	Nitrogen metabolism
Bra016615	49.9457	21.4901	-1.21669	1.23292e-16	6.12489e-16	XP_002890209.1	hypothetical protein ARALYDRAFT_471922	1.02469e-114	unkown funciton
Bra016627	51.0934	19.286	-1.40558	1.48101e-26	9.21354e-26	XP_002890192.1	hypothetical protein ARALYDRAFT_471888	1.91854e-131	unkown funciton
Bra016645	13.6252	52.4325	1.94418	0	0	XP_002892889.1	methyladenine glycosylase family protein	1.20222e-107	DNA or RNA binding
Bra016651	57.4634	22.5237	-1.3512	1.32107e-125	2.13599e-124	XP_002892882.1	hypothetical protein ARALYDRAFT_471776	0	unkown funciton
Bra016653	154.341	888.43	2.52514	0	0	AAR08913.2	pyrophosphate-energized vacuolar membrane proton pump	0	transporter facilitation
Bra016656	125.886	22.712	-2.47059	1.59861e-277	3.76741e-276	XP_002890107.1	hypothetical protein ARALYDRAFT_471751	0	unkown funciton
Bra016669	23.4992	7.18441	-1.70967	5.80184e-78	6.91565e-77	XP_002892853.1	ATPDR7/PDR7	0	Energy
Bra016674	5.15731	10.9825	1.09051	3.5405e-09	1.06258e-08	AAL91256.1	At1g15070/F9L1_1	0	unkown funciton
Bra016679	47.6602	15.731	-1.59918	5.92594e-62	6.09839e-61	XP_002892832.1	hypothetical protein ARALYDRAFT_888870	0	unkown funciton
Bra016686	28.0196	84.8364	1.59825	0	0	XP_002890070.1	GAGA-binding transcriptional activator	1.19109e-135	transcription regulation
Bra016688	24.9574	6.50642	-1.93953	6.6036e-48	5.77417e-47	AAF63169.1	AC010657_5 T5E21.13	0	unkown funciton
Bra016689	48.7606	14.2458	-1.77518	4.68716e-70	5.19886e-69	AAK96649.1	T5E21.14/T5E21.14	0	unkown funciton
Bra016694	16.1302	7.32883	-1.13811	2.53594e-19	1.35736e-18	BAJ34269.1	unnamed protein product	0	unkown funciton
Bra016698	49.0077	108.656	1.14868	0	0	NP_172903.1	AL7 (ALFIN-LIKE 7); DNA binding / methylated histone residue binding	2.631e-107	transcription regulation
Bra016703	253.482	120.748	-1.06989	1.87063e-61	1.91396e-60	CBI32005.3	unnamed protein product	1.86476e-86	unkown funciton
Bra016715	17.3786	47.6771	1.45599	0	0	NP_172854.1	emp24/gp25L/p24 family protein	1.92619e-76	others
Bra016719	292.13	613.146	1.06962	5.29e-12	1.85307e-11	AAF79399.1	unnamed protein product	2.45728e-39	unkown funciton
Bra016729	612.612	2539.02	2.05123	0	0	ACS68202.1	glyceraldehyde-3-phosphate dehydrogenase 1	0	carbohydrate metabolism
Bra016731	18.3351	49.8783	1.44381	0	0	XP_002892746.1	hypothetical protein ARALYDRAFT_471493	1.49193e-48	unkown funciton
Bra016746	36.9646	10.6934	-1.78942	1.48423e-36	1.09738e-35	NP_172759.2	glycosyl transferase family 17 protein	0	others
Bra016751	70.7083	244.516	1.78998	4.65406e-13	1.8296e-12	XP_002892717.1	hypothetical protein ARALYDRAFT_334590	7.33884e-23	unkown funciton
Bra016754	6.95401	16.6661	1.261	0	0	ABQ50554.1	hypothetical protein	0	unkown funciton
Bra016755	67.7835	283.861	2.06618	0	0	ABQ50561.1	hypothetical protein	2.14542e-43	unkown funciton
Bra016757	59.0268	258.802	2.13241	1.39422e-12	5.14046e-12	XP_002892712.1	UDP-D-glucose/UDP-D-galactose 4-epimerase 1	0	carbohydrate metabolism
Bra016773	24.989	58.1372	1.21817	7.12098e-13	2.72068e-12	NP_172704.1	ACR8; amino acid binding	0	Nitrogen metabolism
Bra016791	416.732	2050.82	2.29901	4.21796e-12	1.49095e-11	XP_002892674.1	hypothetical protein ARALYDRAFT_471359	6.87282e-29	unkown funciton
Bra016792	92.0833	1463.61	3.99045	2.78e-13	1.13275e-12				no homology
Bra016818	8.66639	3.59804	-1.26822	3.18238e-18	1.6516e-17	XP_002889891.1	hypothetical protein ARALYDRAFT_312200	0	unkown funciton
Bra016820	20.6672	261.902	3.66361	8.9262e-14	3.89772e-13	XP_002889887.1	CYP51G1	1.68016e-126	lipid metabolism
Bra016822	5.27053	213.085	5.33734	1.99618e-13	8.338e-13	XP_002889887.1	CYP51G1	2.69949e-125	lipid metabolism
Bra016824	43.8005	12.146	-1.85047	9.61664e-40	7.47173e-39	BAD95082.1	hypothetical protein	2.36615e-68	unkown funciton
Bra016834	15.4934	55.3109	1.83591	2.78e-13	1.1329e-12	XP_002889868.1	hypothetical protein ARALYDRAFT_471281	2.1831e-94	unkown funciton
Bra016835	22.9058	54.4854	1.25015	2.72448e-13	1.11084e-12	XP_002889867.1	hypothetical protein ARALYDRAFT_471280	1.3068e-102	unkown funciton
Bra016860	341.786	40.2026	-3.08773	0	0	ABF83685.1	At2g42760	4.39591e-59	unknown function
Bra016866	21.1465	2.40429	-3.13674	2.4631e-95	3.34272e-94	XP_002881863.1	phosphoenolpyruvate carboxylase	0	carbohydrate metabolism
Bra016884	41.5916	108.231	1.37975	1.85185e-13	7.7789e-13	NP_181760.1	unknown protein	1.0514e-40	unkown funciton
Bra016890	132.836	283.735	1.09489	1.01097e-12	3.79446e-12	NP_565968.1	mitochondrial import inner membrane translocase subunit Tim17/Tim22/Tim23 family protein	9.99354e-79	transporter facilitation
Bra016924	28.9368	3.90135	-2.89086	9.56888e-108	1.41007e-106	NP_565951.1	nucleoporin interacting component family protein	0	transporter facilitation
Bra016926	36.8014	3.30546	-3.47684	8.32562e-193	1.68374e-191	XP_002881783.1	auto-inhibited Ca(2+)-ATPase, isoform 4	0	transporter facilitation
Bra016934	578.034	1548.51	1.42166	0	0	ABV89651.1	ERD15 protein	2.3982e-82	others
Bra016935	106.651	367.72	1.78571	4.48086e-13	1.76913e-12				no homology
Bra016948	52.6077	2.95967	-4.15177	0	0	XP_002879916.1	hypothetical protein ARALYDRAFT_483191	0	unkown funciton
Bra016959	22.4214	8.47507	-1.40358	1.76928e-25	1.07801e-24	XP_002881751.1	bZIP transcription factor family protein	0	transcription regulation
Bra016961	28.9103	2.50555	-3.52838	6.42578e-138	1.10024e-136	XP_002881749.1	ubiquitin-specific protease 5	0	protein degradation
Bra016962	12.5109	57.8086	2.2081	0	0	NP_199059.1	protein kinase family protein	2.42057e-127	kinase
Bra016964	28.8871	78.3364	1.43926	6.23724e-13	2.40635e-12	NP_850337.1	CYP98A3 (cytochrome P450, family 98, subfamily A, polypeptide 3); monooxygenase/ p-coumarate 3-hydroxylase	0	oxidation reduction
Bra016973	13.7499	131.443	3.25694	0	0	XP_002879889.1	hypothetical protein ARALYDRAFT_483133	0	unkown funciton
Bra016989	10.73	31.0128	1.53121	0	0	NP_181581.1	HEME2; uroporphyrinogen decarboxylase	0	secondary metabolism
Bra016990	75.2258	34.2092	-1.13684	1.21851e-43	1.00415e-42	NP_181580.2	unknown protein	2.24302e-144	unkown funciton
Bra016994	43.1963	87.3834	1.01645	0	0	XP_002888420.1	hypothetical protein ARALYDRAFT_894128	6.16244e-22	unkown funciton
Bra017004	46.3688	18.1539	-1.35287	4.16546e-30	2.76138e-29	ACU17842.1	unknown	1.94063e-74	unkown funciton
Bra017019	64.5314	213.351	1.72516	2.28484e-13	9.44979e-13	NP_565925.1	protein kinase family protein	6.04436e-172	kinase
Bra017047	20.0451	517.408	4.68998	0	0	XP_002879829.1	hypothetical protein ARALYDRAFT_483023	3.78636e-85	unkown funciton
Bra017049	19.4415	5.1173	-1.92568	3.9846e-50	3.58423e-49	XP_002879823.1	hypothetical protein ARALYDRAFT_903241	0	unkown funciton
Bra017052	54.5579	257.82	2.2405	0	0	BAJ34137.1	unnamed protein product	0	unkown funciton
Bra017059	106.311	29.9786	-1.82629	2.76416e-93	3.69013e-92	ACT67493.1	expansin A1	2.43012e-137	cell wall
Bra017077	147.001	7.85727	-4.22566	1.97426e-268	4.5917e-267	NP_565903.1	hydrolase, alpha/beta fold family protein	6.33781e-163	protein degradation
Bra017104	33.3935	70.1837	1.07157	0	0	NP_565895.1	haloacid dehalogenase-like hydrolase family protein	2.93318e-127	carbohydrate metabolism
Bra017121	86.0278	38.6627	-1.15386	9.66986e-40	7.51125e-39	CAG77503.1	peroxidase precursor	1.92007e-174	oxidation reduction
Bra017131	29.0756	5.85507	-2.31205	5.20502e-79	6.26269e-78	NP_565886.1	FAC1 (EMBRYONIC FACTOR1); AMP deaminase	0	secondary metabolism
Bra017134	408.692	65.0067	-2.65235	0	0	XP_002881569.1	hypothetical protein ARALYDRAFT_482825	0	unkown funciton
Bra017139	45.0531	6.95729	-2.69503	2.94966e-101	4.1494e-100	NP_565881.1	IRX12 (IRREGULAR XYLEM 12); laccase	0	oxidation reduction
Bra017144	109.33	21.6823	-2.33411	6.4643e-119	1.0099e-117	XP_002879721.1	ribosome biogenesis regulatory protein family protein	1.4773e-130	translation regulation
Bra017148	58.853	23.4618	-1.3268	8.06402e-30	5.32592e-29	XP_002879716.1	hypothetical protein ARALYDRAFT_482800	1.00951e-173	unkown funciton
Bra017181	23.4579	3.81611	-2.6199	8.4803e-74	9.73756e-73	XP_002881513.1	PHD finger family protein	0	others
Bra017183	59.4843	171.188	1.525	0	0	BAD95109.1	hypothetical protein	4.8101e-45	unkown funciton
Bra017200	22.468	46.1047	1.03704	0	0	XP_002879658.1	ADK/ATPADK1	3.77259e-132	Energy
Bra017207	161.326	70.8581	-1.18697	7.53324e-52	6.95257e-51	XP_002879652.1	hypothetical protein ARALYDRAFT_902846	4.90104e-121	unkown funciton
Bra017215	9.68467	451.154	5.54177	0	0	NP_565855.1	heavy-metal-associated domain-containing protein	3.62104e-100	transporter facilitation
Bra017219	213.214	67.6236	-1.6567	1.23904e-181	2.45296e-180	XP_002881476.1	hypothetical protein ARALYDRAFT_902809	0	unkown funciton
Bra017221	15.7078	32.4826	1.04819	4.4853e-14	2.01674e-13	XP_002881473.1	hypothetical protein ARALYDRAFT_482665	0	unkown funciton
Bra017231	564.945	1319.89	1.22424	6.84564e-12	2.37507e-11	ABD92697.1	los	0	universal stress related
Bra017233	9.87275	282.363	4.83796	9.13936e-13	3.44851e-12	NP_001154557.1	zinc finger (C2H2-type) family protein	0	transcription regulation
Bra017238	36.6094	93.9699	1.35998	4.4964e-13	1.77307e-12	XP_002879610.1	hypothetical protein ARALYDRAFT_482617	7.48507e-62	unkown funciton
Bra017241	13.1957	1.2915	-3.35294	9.58582e-148	1.69775e-146	XP_002879608.1	ATPDR6/PDR6	0	Energy
Bra017253	26.3579	135.449	2.36144	1.31228e-13	5.62259e-13	AAM61505.1	unknown	9.37084e-62	unkown funciton
Bra017258	25.0886	50.4911	1.009	4.77174e-13	1.87401e-12	AAM15405.1	Expressed protein	6.03213e-69	unkown funciton
Bra017272	15.1465	83.9044	2.46977	7.10542e-14	3.13697e-13	XP_002879585.1	yellow-leaf-specific gene 9	4.35252e-103	unkown funciton
Bra017276	227.094	696.649	1.61714	3.84936e-12	1.3658e-11	XP_002879584.1	hypothetical protein ARALYDRAFT_482567	1.30824e-84	unkown funciton
Bra017279	88.3812	21.2158	-2.0586	1.24936e-225	2.71585e-224	BAJ33766.1	unnamed protein product	0	unkown funciton
[truncated: 2,434 more rows]
