# Supplementary material for: The Transcriptome of Brassica napus L. Roots under Waterlogging at the Seedling Stage
Source: Int J Mol Sci. 2013 Jan 28;14(2):2637–51. doi: 10.3390/ijms14022637 (PMC3588007; doi:10.3390/ijms14022637)
Supplement: Supplementary File 3 — Supplementary Table 2 (XLS, 107 KB) [file ijms-14-02637-s003.xls]

## Sheet: 0h
GeneID	0h-RPKM	12h-RPKM	log2 Ratio(12h/0h)	P-value	FDR	GIa	functiona	e value	GO
Bra000111	425.835	119.059	-1.83862	6e-308	1.4637e-306	ABL97985.1	water channel protein	7.87498e-157	transporter facilitation
Bra000214	315.277	42.6088	-2.88739	4.88782e-202	1.01024e-200	XP_002879035.1	calmodulin-2	1.91777e-80	signal transduction
Bra000263	634.077	24.7963	-4.67646	0	0	AAA66068.1	low-temperature regulated protein BN115	1.30082e-64	universal stress related
Bra000265	1407.92	474.467	-1.56919	0	0	ABA01003.2	cold-regulated protein	2.03956e-65	universal stress related
Bra000377	1289.29	300.464	-2.10132	0	0	NP_566036.1	protease inhibitor/seed storage/lipid transfer protein (LTP) family protein	6.55824e-40	protein degradation
Bra000594	387.636	167.222	-1.21293	0	0	CAB51903.1	cellulase	0	cell wall
Bra000638	305.338	62.8437	-2.28057	0	0	ACS28249.1	BREVIPEDICELLUS	0	cell wall
Bra001046	1097.04	224.685	-2.28764	0	0	Q9SDM8.1	S-adenosylmethionine decarboxylase proenzyme 3	0	others
Bra001154	376.962	776.065	1.04176	5.24914e-12	1.83996e-11	XP_002882425.1	60S ribosomal protein L22-2	2.30893e-45	translation regulation
Bra001249	316.063	48.9062	-2.69212	0	0	ABS30419.1	CIL1	4.99957e-93	others
Bra001637	1230.45	2714.38	1.14144	2.56262e-11	8.62208e-11	Q944W6.1	Translationally-controlled tumor protein homolog		translation regulation
Bra001661	283.014	97.1076	-1.54322	2.9158e-219	6.26583e-218	Q9FUZ1.1	S-adenosylmethionine synthase 2	1.32308e-08	Nitrogen metabolism
Bra001953	2425.94	1108.11	-1.13044	0	0	BAJ34053.1	unnamed protein product	2.3674e-77	unkown funciton
Bra001986	409.708	69.3812	-2.56198	0	0	XP_002865562.1	peroxidase 64	1.07999e-157	oxidation reduction
Bra002034	291.446	70.9687	-2.03798	2.21086e-299	5.34439e-298	NP_565409.1	EXL5 (EXORDIUM LIKE 5)	1.45812e-177	others
Bra002116	694.62	51.7771	-3.74584	0	0	XP_002871787.1	cobalamin-independent methionine synthase	0	Nitrogen metabolism
Bra002332	654.181	1719.29	1.39405	0	0	XP_002874016.1	hypothetical protein ARALYDRAFT_910122	0	unkown funciton
Bra002942	481.197	5402.04	3.4888	2.12322e-11	7.18229e-11	XP_002866069.1	pyruvate decarboxylase-2	0	carbohydrate metabolism
Bra003062	294.085	132.861	-1.14631	4.92486e-169	9.44538e-168	XP_002865971.1	pectinesterase family protein	0	cell wall
Bra003699	644.468	1336.62	1.05241	1.19695e-11	4.09583e-11				no homology
Bra003751	302.735	108.366	-1.48214	2.6994e-217	5.78135e-216	NP_565111.1	nodulin MtN21 family protein	0	unkown funciton
Bra003755	528.949	83.418	-2.6647	0	0	NP_177672.2	AtbZIP44 (Arabidopsis thaliana basic leucine-zipper 44); DNA binding/protein heterodimerization/transcription factor	3.03139e-59	transcription regulation
Bra004126	277.649	676.39	1.28459	5.48384e-12	1.91802e-11	XP_002888446.1	hypothetical protein ARALYDRAFT_475676	7.93749e-50	unkown funciton
Bra004915	308.196	43.6712	-2.81909	0	0	AAM66074.1	endosperm-specific protein-like protein	2.00726e-152	unkown funciton
Bra004928	411.169	113.123	-1.86184	2.35606e-224	5.10421e-223	AAQ54337.1	MADS-box protein	1.5242e-83	transcription regulation
Bra004950	542.566	1814.81	1.74194	9.01034e-12	3.10218e-11	BAA92258.1	plasma membrane aquaporin 1b	2.3376e-161	transporter facilitation
Bra005236	467.178	180.84	-1.36926	1.52527e-287	3.6348e-286	NP_181225.1	MAT3 (methionine adenosyltransferase 3); copper ion binding / methionine adenosyltransferase	0	others
Bra005261	652.116	1699.43	1.38185	0	0	ABD92697.1	los	0	universal stress related
Bra005469	1138.18	4064.3	1.83627	0	0	NP_850220.1	dormancy/auxin associated family protein	3.5282e-46	secondary metabolism
Bra005720	306.545	854.987	1.4798	0	0	P56170.1	MT23_BRAJU//RecName: Full=Metallothionein-like protein type 2, MT2-22	5.19968e-29	transporter facilitation
Bra005731	285.094	858.87	1.591	1.63447e-12	5.98618e-12	AAO64770.1	unnamed protein product	4.39922e-36	unkown funciton
Bra006107	356.343	66.4447	-2.42304	0	0	XP_002871486.1	NADP-malic enzyme 2	0	carbohydrate metabolism
Bra006273	414.891	47.6939	-3.12086	0	0	BAJ34616.1	unnamed protein product	6.25693e-35	unkown funciton
Bra006429	423.896	27.7173	-3.93485	0	0	XP_002871787.1	cobalamin-independent methionine synthase	0	Nitrogen metabolism
Bra006578	774.8	3397.19	2.13244	0	0	XP_002874016.1	hypothetical protein ARALYDRAFT_910122	0	unkown funciton
Bra007070	614.447	79.5285	-2.94975	0	0	BAJ34532.1	unnamed protein product	0	unkown funciton
Bra008683	529.752	86.941	-2.60721	0	0	NP_197069.1	RGP2 (REVERSIBLY GLYCOSYLATED POLYPEPTIDE 2); transferase, transferring hexosyl groups	0	others
Bra008695	588.787	112.671	-2.38562	0	0	XP_002873728.1	hypothetical protein ARALYDRAFT_488394	0	unkown funciton
Bra008903	664.63	284.789	-1.22266	0	0	BAJ34332.1	unnamed protein product	0	unkown funciton
Bra009108	334.856	42.0425	-2.99362	3.48568e-150	6.2114e-149	NP_001078533.1	metal ion binding	7.06777e-34	transporter facilitation
Bra009221	609.286	1565.82	1.36173	0	0	AAR15704.3	peroxidase	3.99857e-151	oxidation reduction
Bra009298	328.085	41.6869	-2.9764	0	0	NP_196320.2	aspartic-type endopeptidase	0	protein degradation
Bra009583	307.555	56.4082	-2.44687	0	0	AAB88009.1	heat shock cognate protein HSC70	0	universal stress related
Bra009947	278.871	753.689	1.43437	0	0	NP_198122.4	structural constituent of ribosome	1.44932e-39	translation regulation
Bra010075	2759.79	238.1	-3.53492	0	0	XP_002864786.1	hypothetical protein ARALYDRAFT_496412	9.26333e-88	unkown funciton
Bra010111	293.645	21.9952	-3.73881	0	0	NP_201074.1	proton-dependent oligopeptide transport (POT) family protein	0	transporter facilitation
Bra010499	290.076	120.804	-1.26376	4.18638e-166	7.9479e-165	XP_002869731.1	hypothetical protein ARALYDRAFT_914168	0	unkown funciton
Bra010665	609.394	2518.97	2.04738	0	0	AAK01359.1	dehydration stress-induced protein	8.03646e-97	universal stress related
Bra010738	851.95	395.691	-1.10639	3.83756e-156	6.99856e-155	NP_195570.1	ATFP6 (FARNESYLATED PROTEIN 6); metal ion binding	1.67996e-82	transporter facilitation
Bra010775	351.867	63.669	-2.46637	0	0	ABV89627.1	early-responsive to dehydration 4	0	universal stress related
Bra011568	396.247	1799.15	2.18284	4.02678e-12	1.4251e-11	ABV26711.1	cyclophilin	1.10197e-68	others
Bra011604	418.285	32.9651	-3.66548	0	0	NP_849565.1	TMT2 (TONOPLAST MONOSACCHARIDE TRANSPORTER2); carbohydrate transmembrane transporter/ nucleoside transmembrane transporter/ sugar:hydrogen symporter	0	transporter facilitation
Bra011792	637.516	147.467	-2.11207	0	0	NP_195500.1	PCK1 (PHOSPHOENOLPYRUVATE CARBOXYKINASE 1); ATP binding / phosphoenolpyruvate carboxykinase (ATP)/ phosphoenolpyruvate carboxykinase/ purine nucleotide binding	0	kinase
Bra011828	387.122	27.2533	-3.82829	0	0	NP_195694.1	unknown protein	2.08303e-137	unkown funciton
Bra012223	321.322	130.679	-1.29799	1.30303e-230	2.86568e-229	XP_002890376.1	hypothetical protein ARALYDRAFT_472256	0	unkown funciton
Bra012230	1647.34	350.804	-2.2314	0	0	ADJ96373.1	cold-regulated protein	1.67497e-64	universal stress related
Bra012238	1741.08	389.635	-2.15979	0	0	AAB53101.2	catalase	0	signal transduction
Bra012676	1192.1	15.7084	-6.24582	0	0	NP_567523.1	CT-BMY (CHLOROPLAST BETA-AMYLASE); beta-amylase	0	carbohydrate metabolism
Bra012996	354.45	55.1504	-2.68414	0	0	XP_002866404.1	hypothetical protein ARALYDRAFT_496244	0	unkown funciton
Bra013116	1129.88	4995.84	2.14455	2.9089e-11	9.76452e-11				no homology
Bra013363	343.354	61.477	-2.48158	0	0	AAL25602.1	AT4g18950/F13C5_120	0	unkown funciton
Bra013576	9979.61	2016.08	-2.30743	0	0	ABU54828.1	peroxidase	0	signal transduction
Bra013774	344.184	25.5849	-3.74982	0	0	XP_002867677.1	hypothetical protein ARALYDRAFT_492441	0	unkown funciton
Bra014002	801.158	293.09	-1.45074	0	0	AAP92453.1	S-adenosyl-L-homocystein hydrolase	0	carbohydrate metabolism
Bra014154	1671.94	4923.48	1.55815	1.70701e-11	5.79524e-11	NP_564532.1	protease inhibitor/seed storage/lipid transfer protein (LTP) family protein	6.04618e-22	protein degradation
Bra014208	279.828	10.2083	-4.77672	0	0	XP_002894215.1	hypothetical protein ARALYDRAFT_474107	1.40068e-160	unkown funciton
Bra014232	363.685	164.525	-1.14438	2.58504e-205	5.37773e-204	BAE99023.1	tubulin alpha-2/alpha-4 chain	0	cytoskeleton
Bra014655	628.263	213.839	-1.55485	0	0	NP_191260.1	strictosidine synthase family protein	0	secondary metabolism
Bra014955	329.478	751.946	1.19045	0	0	CAA72005.1	nodulin-35 homologue	4.24788e-148	unkown funciton
Bra015135	421.478	106.626	-1.9829	0	0	Q9M462.1	Glucose-1-phosphate adenylyltransferase small subunit, chloroplastic	0	carbohydrate metabolism
Bra015172	378.235	25.6125	-3.88436	0	0	XP_002885806.1	predicted protein	0	unkown funciton
Bra015316	339.695	12.7681	-4.73363	0	0	AAM61029.1	ankyrin-like protein	0	cytoskeleton
Bra015607	763.547	333.056	-1.19695	0	0	3LE2	A Chain A, Structure Of Arabidopsis Atserpin1. Native Stressed Conforma	0	universal stress related
Bra015665	311.594	104.548	-1.57551	0	0	ABB17025.1	protein disulfide isomerase	0	others
Bra015687	292.411	85.2597	-1.77806	0	0	XP_002889128.1	hypothetical protein ARALYDRAFT_476882	0	unkown funciton
Bra015693	1561.31	25289.7	4.01772	0	0	AAF23532.1	AF110434_1 alcohol dehydrogenase	0	carbohydrate metabolism
Bra015711	282.709	93.0949	-1.60255	6.69928e-273	1.56839e-271	BAJ34070.1	unnamed protein product	0	unkown funciton
Bra016187	304.864	110.767	-1.46064	2.75762e-74	3.17559e-73	XP_002888795.1	hypothetical protein ARALYDRAFT_894896	7.21743e-55	unkown funciton
Bra016405	436.407	93.3079	-2.2256	0	0	NP_173594.1	ATPDIL1-1 (PDI-LIKE 1-1); protein disulfide isomerase	0	Energy
Bra016459	289.804	18.3807	-3.97882	0	0	AAB53101.2	catalase	0	oxidation reduction
Bra016541	364.346	149.957	-1.28076	1.9694e-128	3.23003e-127	AAF27100.1	Putative phospatase 2A inhibitor	2.34683e-99	signal transduction
Bra016564	489.591	45.7774	-3.41887	0	0	Q9LE22.1	Probable calcium-binding protein CML27;	0	small molecular
Bra016719	292.13	613.146	1.06962	5.29e-12	1.85307e-11	AAF79399.1	predicted protein	2.45728e-39	unkown funciton
Bra016729	612.612	2539.02	2.05123	0	0	ACS68202.1	glyceraldehyde-3-phosphate dehydrogenase 1	0	carbohydrate metabolism
Bra016791	416.732	2050.82	2.29901	4.21796e-12	1.49095e-11	XP_002892674.1	hypothetical protein ARALYDRAFT_471359	6.87282e-29	unkown funciton
Bra016860	341.786	40.2026	-3.08773	0	0	ABF83685.1	At2g42760	4.39591e-59	unknown function
Bra016934	578.034	1548.51	1.42166	0	0	ABV89651.1	ERD15 protein	2.3982e-82	others
Bra017134	408.692	65.0067	-2.65235	0	0	XP_002881569.1	hypothetical protein ARALYDRAFT_482825	0	unkown funciton
Bra017231	564.945	1319.89	1.22424	6.84564e-12	2.37507e-11	ABD92697.1	los	0	universal stress related
Bra017350	328.103	83.2437	-1.97873	4.42004e-230	9.71405e-229	ACY74379.1	allene oxidase cyclase	4.2464e-145	others
Bra017624	299.84	88.9046	-1.75386	4.71796e-183	9.38683e-182	ABE41833.1	caffeoyl-CoA 3-O-methyltransferase	2.34045e-138	secondary metabolism
Bra017960	506.593	47.2243	-3.42322	0	0	XP_002877695.1	hypothetical protein ARALYDRAFT_485334	1.12357e-142	unkown funciton
Bra018180	528.269	39.8769	-3.72765	0	0	XP_002877534.1	alpha-glucan phosphorylase 2	0	carbohydrate metabolism
Bra018543	510.927	2809.86	2.45931	0	0	AAP58392.1	glutathione S-transferase 2	1.31987e-119	Nitrogen metabolism
Bra018575	338.707	58.6787	-2.52913	0	0	XP_002892492.1	calreticulin 2	0	small molecular
Bra019044	432.663	200.304	-1.11106	0	0	XP_002867499.1	hypothetical protein ARALYDRAFT_913787	1.82446e-32	unkown funciton
Bra019632	383.595	821.768	1.09915	0	0	NP_190870.1	STV1 (SHORT VALVE1); structural constituent of ribosome	7.69988e-54	translation regulation
Bra019722	998.818	3646.78	1.86833	3.18518e-11	1.06762e-10	P04796.2	RecName: Full=Glyceraldehyde-3-phosphate dehydrogenase, cytosolic	2.5161e-150	carbohydrate metabolism
Bra019875	393.031	166.114	-1.24247	1.56576e-166	2.97793e-165	AAG40339.1	unknown protein	5.5944e-81	unkown funciton
Bra020005	353.653	173.624	-1.02636	1.89158e-154	3.43398e-153	XP_002889762.1	hypothetical protein ARALYDRAFT_471063	0	unkown funciton
Bra020209	497.04	74.8995	-2.73033	0	0	XP_002872015.1	predicted protein	5.23528e-42	unkown funciton
Bra020251	372.822	143.73	-1.37513	2.9387e-255	6.6934e-254	ACS68201.1	elongation factor 1 alpha	0	translation regulation
Bra020325	504.991	1044.25	1.04813	5.53046e-12	1.9339e-11	XP_002866324.1	UDP-glucuronic acid decarboxylase	0	carbohydrate metabolism
Bra020433	358.122	9.05715	-5.30525	0	0	BAJ34580.1	unnamed protein product	7.14757e-135	unkown funciton
Bra021132	728.501	113.937	-2.6767	0	0	P55939.2	PLDA2_BRAOC RecName: Full=Phospholipase D alpha 2	0	signal transduction
Bra021187	815.175	1800.26	1.14303	5.1128e-12	1.79414e-11	Q944W6.1	Translationally-controlled tumor protein homolog	1.40709e-81	translation regulation
Bra021200	325.408	738.634	1.18261	1.59872e-13	6.78612e-13	NP_188299.1	ATEBP (ETHYLENE-RESPONSIVE ELEMENT BINDING PROTEIN); DNA binding / protein binding / transcription activator/ transcription factor	2.37103e-89	transcription regulation
Bra021458	354.167	120.232	-1.55861	5.5755e-303	1.35291e-301	AAS45435.1	S-adenosylmethionine decarboxylase	1.34937e-175	secondary metabolism
Bra021517	337.51	155.284	-1.12002	5.446e-169	1.04386e-167	XP_002884997.1	predicted protein	0	unkown funciton
Bra022308	455.764	1116.52	1.29265	2.64566e-12	9.50752e-12	NP_188456.1	protease inhibitor/seed storage/lipid transfer protein (LTP) family protein	9.02299e-34	protein degradation
Bra022553	290.808	36.0053	-3.01379	0	0	AAL24269.1	unknown protein	6.4414e-172	unkown funciton
Bra022585	2049.57	418.883	-2.2907	0	0	AAR21079.1	stress responsive protein	0	universal stress related
Bra022678	472.015	96.9811	-2.28306	3.6471e-102	5.16236e-101	XP_002866001.1	hypothetical protein ARALYDRAFT_918490	1.21798e-09	unkown funciton
Bra022815	656.562	1679.1	1.35469	1.66434e-11	5.65456e-11	NP_180643.1	ATGSTF9 (GLUTATHIONE S-TRANSFERASE PHI 9); copper ion binding / glutathione binding / glutathione peroxidase/ glutathione transferase	2.27056e-111	oxidation reduction
Bra022816	618.112	1659.44	1.42476	1.04405e-12	3.91037e-12	XP_002879283.1	early dehydration-induced 13	5.77401e-115	universal stress related
Bra023084	301.682	102.779	-1.55348	4.96706e-234	1.09691e-232	XP_002881476.1	hypothetical protein ARALYDRAFT_902809	0	unkown funciton
Bra023392	432.74	1067.59	1.30278	8.2958e-12	2.86172e-11	XP_002873600.1	hypothetical protein ARALYDRAFT_488130	2.23341e-86	unkown funciton
Bra023573	643.958	99.692	-2.69142	0	0	XP_002873784.1	unknown protein	0	unkown funciton
Bra023645	527.141	68.3503	-2.94717	0	0	XP_002871787.1	cobalamin-independent methionine synthase	0	Nitrogen metabolism
Bra023707	403.281	915.156	1.18223	4.02678e-12	1.42526e-11	ABV89631.1	aluminum-induced protein	3.23636e-86	universal stress related
Bra024020	314.014	78.7972	-1.99461	0	0	XP_002867311.1	kinase family protein	0	kinase
Bra024087	547.876	118.119	-2.21361	0	0	NP_176710.1	XTH17 (XYLOGLUCAN ENDOTRANSGLUCOSYLASE/HYDROLASE 17); hydrolase, acting on glycosyl bonds / hydrolase, hydrolyzing O-glycosyl compounds / xyloglucan:xyloglucosyl transferase	1.19446e-133	carbohydrate metabolism
Bra024265	331.724	720.274	1.11856	5.30754e-12	1.85901e-11	XP_002866593.1	protease inhibitor/seed storage/lipid transfer protein family protein	1.86659e-43	protein degradation
Bra024280	505.493	4003.01	2.98532	0	0	BAJ33879.1	unnamed protein product	2.4065e-151	unkown funciton
Bra024332	283.233	108.013	-1.39078	2.04002e-45	1.72933e-44	XP_002864926.1	hypothetical protein ARALYDRAFT_496705	3.18535e-31	unkown funciton
Bra024570	315.753	64.1787	-2.29863	6.42378e-232	1.41469e-230	XP_002893269.1	hypothetical protein ARALYDRAFT_472578	1.55686e-86	unkown funciton
Bra025439	330.076	45.1357	-2.87046	1.75171e-225	3.80525e-224	XP_002870563.1	hypothetical protein ARALYDRAFT_493755	1.15958e-71	unkown funciton
Bra025747	1059.31	3871.07	1.86961	0	0	ACF23034.1	ST225	1.85549e-34	unkown funciton
Bra025804	320.78	74.2574	-2.11098	0	0	XP_002521263.1	ATP synthase subunit beta vacuolar, putative	0	Energy
Bra025819	5486.27	909.805	-2.5922	0	0	AAR23753.1	dehydrin	2.32652e-83	universal stress related
Bra025924	282.176	13.0286	-4.43684	4.95256e-286	1.17847e-284	XP_002892987.1	hypothetical protein ARALYDRAFT_889234	1.63625e-74	unkown funciton
Bra026009	391.975	28.5554	-3.77893	0	0	XP_002887744.1	RHM1/ROL1	0	others
Bra026150	343.363	690.317	1.00752	8.39106e-13	3.18081e-12	XP_002298214.1	predicted protein	1.96113e-10	unkown funciton
Bra026313	291.348	31.8113	-3.19513	0	0	XP_002869545.1	hypothetical protein ARALYDRAFT_913755	0	unkown funciton
Bra026341	518.325	217.95	-1.24986	1.41977e-244	3.17713e-243	XP_002867499.1	hypothetical protein ARALYDRAFT_913787	6.61421e-49	unkown funciton
Bra026701	994.19	135.967	-2.87026	0	0	AAG40355.1	unnamed protein product	8.39392e-23	unkown funciton
Bra027005	455.976	104.887	-2.12013	0	0	XP_002887985.1	hypothetical protein ARALYDRAFT_893174	2.01861e-163	unkown funciton
Bra027040	418.066	154.714	-1.43413	1.0176e-226	2.21961e-225	NP_176439.1	protease inhibitor/seed storage/lipid transfer protein (LTP) family protein	5.40979e-42	protein degradation
Bra027042	5229.53	1336.72	-1.96798	0	0				no homology
Bra027127	443.319	188.733	-1.232	1.71735e-263	3.96244e-262	XP_002886585.1	ATP-citrate lyase A-2	0	lipid metabolism
Bra027156	328.683	150.015	-1.13159	4.56148e-136	7.76035e-135	NP_176250.1	AtGolS4 (Arabidopsis thaliana galactinol synthase 4); transferase, transferring glycosyl groups / transferase, transferring hexosyl groups	0	others
Bra027358	657.971	310.035	-1.08559	1.03466e-293	2.4842e-292	ACO57703.1	epithiospecifier modifier	0	others
Bra027469	988.788	2068.07	1.06455	0	0	O64432.1	TRXH_BRARA/RecName: Full=Thioredoxin H-type; Short=Trx-H	5.86558e-65	unkown funciton
Bra027936	479.264	88.3784	-2.43905	0	0	BAH56849.1	AT1G56340	0	unkown funciton
Bra028523	727.695	84.1447	-3.11239	0	0	XP_002870594.1	hypothetical protein ARALYDRAFT_493778	2.69964e-114	unkown funciton
Bra028543	356.318	4395.67	3.62484	9.07718e-12	3.12452e-11	XP_002877893.1	hypothetical protein ARALYDRAFT_906673	0	unkown funciton
Bra028761	568.964	47.6824	-3.57681	0	0	P00434.3	RecName: Full=Peroxidase P7; AltName: Full=TP7	4.21183e-157	oxidation reduction
Bra029267	4893.55	618.718	-2.98353	0	0	XP_002864786.1	hypothetical protein ARALYDRAFT_496412	9.89658e-87	unkown funciton
Bra029765	3286.73	1123.59	-1.54854	0	0	BAA11391.1	metallothionein-like protein	8.86931e-29	transporter facilitation
Bra029971	279.339	1155.14	2.04798	0	0	XP_002875996.1	ATPSK4	1.24153e-30	Energy
Bra030083	743.835	290.154	-1.35816	0	0	XP_002893518.1	hypothetical protein ARALYDRAFT_473038	3.85538e-62	unkown funciton
Bra030259	289.303	1259.94	2.1227	3.3391e-12	1.19124e-11	XP_002880432.1	lipid-associated family protein	1.27479e-92	lipid metabolism
Bra030716	499.713	109.049	-2.19613	0	0	XP_002892446.1	UDP-D-apiose/UDP-D-xylose synthase 2	0	cell wall
Bra030799	277.528	79.4719	-1.80411	0	0	XP_002892522.1	hypothetical protein ARALYDRAFT_471079	0	unkown funciton
Bra030816	321.738	68.8633	-2.22408	0	0	XP_002894559.1	hypothetical protein ARALYDRAFT_474678	0	unkown funciton
Bra031157	372.5	143.282	-1.37838	0	0	NP_565495.1	SYTA (SYNAPTOTAGMIN A)	0	others
Bra031205	414.516	844.024	1.02586	0	0	NP_850015.1	predicted protein	1.84478e-81	universal stress related
Bra031393	572.261	8.91119	-6.00491	0	0	AAC28500.1	Similar to glucose-6-phosphate/phosphate-translocator (GPT)	0	carbohydrate metabolism
Bra031772	313.862	13.1074	-4.58167	0	0	ABJ98060.1	glucose 6-Pi/Pi transporter	1.86137e-174	transporter facilitation
Bra031790	569.697	241.124	-1.24042	0	0	AAB03108.1	aspartic protease	0	protein degradation
Bra031934	405.975	49.9363	-3.02323	0	0	BAJ34593.1	unnamed protein product	1.23957e-151	unkown funciton
Bra032004	506.445	184.665	-1.45549	0	0	BAJ34372.1	unnamed protein product	0	unkown funciton
Bra032749	655.644	177.238	-1.88722	0	0	XP_002868327.1	hypothetical protein ARALYDRAFT_915517	0	unkown funciton
Bra032750	1097.1	345.436	-1.66721	0	0	AAP92453.1	S-adenosyl-L-homocystein hydrolase	0	carbohydrate metabolism
Bra032889	1731.31	431.582	-2.00416	0	0	NP_001077616.1	AGP31 (arabinogalactan-protein 31)	7.175e-62	others
Bra032906	447.819	149.47	-1.58306	2.38312e-303	5.78709e-302	AAF16754.1	predicted protein	7.87228e-90	unkown funciton
Bra033563	327.515	41.9591	-2.96451	0	0	XP_002868845.1	hypothetical protein ARALYDRAFT_490602	1.70208e-115	unkown funciton
Bra033603	382.546	769.899	1.00903	1.69242e-12	6.18567e-12	NP_001119144.1	40S ribosomal protein S25 (RPS25E)	5.82255e-33	translation regulation
Bra033737	339.925	153.511	-1.14687	1.42877e-190	2.88036e-189	XP_002863588.1	tubulin beta-4 chain	0	cytoskeleton
Bra033875	519.865	1732.69	1.7368	1.17728e-12	4.38415e-12	Q39315.1	ACBP_BRANA//RecName: Full=Acyl-CoA-binding protein; Short=ACBP	1.31718e-40	universal stress related
Bra034402	2827.25	834.299	-1.76076	0	0	ADK13090.1	annexin 1	1.30965e-174	lipid metabolism
Bra034675	781.724	2299.49	1.55658	9.00436e-12	3.10046e-11	AAG30607.1	aquaporin	0	transporter facilitation
Bra035298	305.135	141.379	-1.10988	3.13926e-143	5.46002e-142	BAJ34553.1	unnamed protein product	0	unkown funciton
Bra035649	393.948	28.9809	-3.76483	0	0	BAJ34212.1	unnamed protein product	0	unkown funciton
Bra035677	318.131	1025.82	1.68909	7.26708e-12	2.51582e-11	XP_002284357.1	PREDICTED: hypothetical protein	2.89245e-44	unkown funciton
Bra035951	309.219	97.1851	-1.66982	0	0	XP_002866404.1	hypothetical protein ARALYDRAFT_496244	0	unkown funciton
Bra035997	978.733	305.183	-1.68124	2.21024e-303	5.37135e-302	CAA65749.1	lamin	3.13192e-66	cytoskeleton
Bra036327	476.143	136.467	-1.80285	0	0	NP_192064.1	anac069 (Arabidopsis NAC domain containing protein 69); transcription factor	8.79371e-111	transcription regulation
Bra036650	346.478	104.216	-1.73319	0	0	NP_176458.1	BETA-VPE (BETA VACUOLAR PROCESSING ENZYME); cysteine-type endopeptidase	0	protein degradation
Bra037296	1005.05	2394.97	1.25273	1.4545e-11	4.95907e-11	P24525.2	CYPH_BRANA/RecName: Full=Peptidyl-prolyl cis-trans isomerase;	5.81612e-86	others
Bra037629	480.056	105.26	-2.18925	1.07984e-134	1.82351e-133	AAP21196.1	predicted protein	2.53425e-15	unkown funciton
Bra037958	1995.99	836.225	-1.25514	0	0	AAY53488.1	epithiospecifier protein	2.57788e-156	universal stress related
Bra038233	508.7	38.3237	-3.73051	0	0	BAJ33687.1	unnamed protein product	0	unkown funciton
Bra038281	316.166	92.7951	-1.76856	4.96202e-251	1.12457e-249	AAV34677.1	mitogen-activated protein kinase 3	0	kinase
Bra038321	1058.54	454.96	-1.21827	4.32858e-164	8.14523e-163	BAJ33884.1	unnamed protein product	1.28199e-43	unkown funciton
Bra038671	443.454	2068.63	2.22182	0	0	XP_002884856.1	predicted protein	6.91962e-89	unkown funciton
Bra039176	291.66	54.4504	-2.42127	0	0	AAS45435.1	S-adenosylmethionine decarboxylase	6.07041e-179	secondary metabolism
Bra039496	586.88	230.888	-1.34587	0	0	NP_568534.1	eIF4-gamma/eIF5/eIF2-epsilon domain-containing protein	0	translation regulation
Bra039506	312.732	110.958	-1.4949	4.08728e-262	9.41696e-261	XP_002863588.1	tubulin beta-4 chain	0	cytoskeleton
Bra039554	303.739	119.042	-1.35136	4.302e-236	9.52015e-235	XP_002870243.1	CYP702A6	0	oxidation reduction
Bra039563	1080.43	2717.27	1.33055	7.65232e-12	2.64489e-11	XP_002870258.1	hypothetical protein ARALYDRAFT_493374	3.59963e-40	unkown funciton
Bra039946	2836.16	1062.23	-1.41684	0	0	XP_002878660.1	hypothetical protein ARALYDRAFT_481185	1.32308e-08	unkown funciton
Bra040496	293.526	49.2658	-2.57483	0	0	CAB51903.1	cellulase	0	cell wall
Bra040780	311.541	1054.32	1.75881	2.04836e-12	7.42539e-12	XP_002884233.1	expressed protein	3.46757e-17	unkown funciton
Bra040817	939.763	3439.26	1.87173	0	0				no homology
Bra040870	578.022	136.235	-2.08502	0	0	XP_002886130.1	early-responsive to dehydration 7	0	universal stress related
Bra040927	1281.64	282.929	-2.17947	0	0	XP_002881019.1	hypothetical protein ARALYDRAFT_481805	1.87852e-64	unkown funciton
Bra041021	1471.13	708.379	-1.05433	6.01744e-90	7.8591e-89	XP_002884538.1	predicted protein	1.33077e-16	unkown funciton
Bra041115	339.937	3854.65	3.50326	0	0	XP_003064997.1	predicted protein	8.0311e-22	unkown funciton
Bra041148	2033.08	5050.9	1.31288	1.28433e-11	4.3887e-11	ABO20854.1	hypothetical protein	1.17903e-31	unkown funciton
a represented the informaiton of homolog sequence for the tags in NCBI database.

## Sheet: 12h
GeneID	0h-RPKM	12h-RPKM	log2 Ratio(12h/0h)	P-value	FDR	GIa	Functiona	E value	GO
Bra015693	1561.31	25289.7	4.01772	0	0	AAF23532.1	AF110434_1 alcohol dehydrogenase	0	carbohydrate metabolism
Bra028896	129.981	7012.47	5.75355	0	0	XP_002870931.1	hypothetical protein ARALYDRAFT_486945	0	unkown funciton
Bra002942	481.197	5402.04	3.4888	2.12322e-11	7.18229e-11	XP_002866069.1	pyruvate decarboxylase-2	0	carbohydrate metabolism
Bra026348	21.4906	5310.53	7.949	2.1072e-13	8.76732e-13	AAK53036.1	AF375452_1/1.68962e-138/AT4g27450/F27G19_50		unkown funciton
Bra041148	2033.08	5050.9	1.31288	1.28433e-11	4.3887e-11	ABO20854.1	hypothetical protein	1.17903e-31	unkown funciton
Bra013116	1129.88	4995.84	2.14455	2.9089e-11	9.76452e-11				no homology
Bra014154	1671.94	4923.48	1.55815	1.70701e-11	5.79524e-11	NP_564532.1	protease inhibitor/seed storage/lipid transfer protein (LTP) family protein	6.04618e-22	protein degradation
Bra001291	99.1404	4711.41	5.57054	0	0	XP_002884771.1	hypothetical protein ARALYDRAFT_897178	1.50379e-51	unkown funciton
Bra028543	356.318	4395.67	3.62484	9.07718e-12	3.12452e-11	XP_002877893.1	hypothetical protein ARALYDRAFT_906673	0	unkown funciton
Bra005469	1138.18	4064.3	1.83627	0	0	NP_850220.1	dormancy/auxin associated family protein	3.5282e-46	secondary metabolism
Bra015252	50.4946	4045.37	6.324	7.63834e-14	3.35463e-13	BAJ34348.1	unnamed protein product	5.24906e-29	unkown funciton
Bra024280	505.493	4003.01	2.98532	0	0	BAJ33879.1	unnamed protein product	2.4065e-151	unkown funciton
Bra025747	1059.31	3871.07	1.86961	0	0	ACF23034.1	/1.85549e-34/ST225		unkown funciton
Bra041115	339.937	3854.65	3.50326	0	0	XP_003064997.1	predicted protein	8.0311e-22	unkown funciton
Bra022364	215.732	3733.85	4.11335	0	0	NP_001078182.1	pentatricopeptide (PPR) repeat-containing protein	4.14881e-18	unkown funciton
Bra019722	998.818	3646.78	1.86833	3.18518e-11	1.06762e-10	P04796.2	G3PC_SINAL/2.5161e-150/RecName: Full=Glyceraldehyde-3-phosphate dehydrogenase, cytosolic		carbohydrate metabolism
Bra035070	52.4317	3644.82	6.11926	1.9118e-12	6.94456e-12	XP_002889216.1	hypothetical protein ARALYDRAFT_895785	0	unkown funciton
Bra000321	33.1183	3563.32	6.74945	9.31478e-13	3.51179e-12	P29108.1	STAD_BRANA RecName: Full=Acyl-	0	lipid metabolism
Bra040817	939.763	3439.26	1.87173	0	0				no homology
Bra006578	774.8	3397.19	2.13244	0	0	XP_002874016.1	hypothetical protein ARALYDRAFT_910122	0	unkown funciton
Bra010404	16.8286	3390.3	7.65435	0	0	AAK53036.1	AF375452_1/1.38219e-140/AT4g27450/F27G19_50		unkown funciton
Bra009487	226.594	3108.77	3.77817	2.37588e-14	1.09148e-13	AAR24695.1	At5g04080	1.02321e-24	unkown funciton
Bra018543	510.927	2809.86	2.45931	0	0	AAP58392.1	glutathione S-transferase 2	1.31987e-119	Nitrogen metabolism
Bra039563	1080.43	2717.27	1.33055	7.65232e-12	2.64489e-11	XP_002870258.1	hypothetical protein ARALYDRAFT_493374	3.59963e-40	unkown funciton
Bra001637	1230.45	2714.38	1.14144	2.56262e-11	8.62208e-11	Q944W6.1	Translationally-controlled tumor protein homolog		translation regulation
Bra016729	612.612	2539.02	2.05123	0	0	ACS68202.1	glyceraldehyde-3-phosphate dehydrogenase 1	0	carbohydrate metabolism
Bra032002	246.161	2528.9	3.36083	8.53984e-13	3.23184e-12	ABV89642.1	universal stress protein family protein	8.67723e-80	universal stress related
Bra010665	609.394	2518.97	2.04738	0	0	AAK01359.1	AF314810_1/8.03646e-97/dehydration stress-induced protein		universal stress related
Bra028552	35.1152	2464.53	6.13307	2.53352e-13	1.03695e-12	XP_002871454.1	hypothetical protein ARALYDRAFT_487941	6.33649e-61	unkown funciton
Bra034572	22.0673	2414.91	6.77391	0	0	XP_002869207.1	hypothetical protein ARALYDRAFT_491329	2.90934e-24	unkown funciton
Bra037296	1005.05	2394.97	1.25273	1.4545e-11	4.95907e-11	P24525.2	CYPH_BRANA/5.81612e-86/RecName: Full=Peptidyl-prolyl cis-trans isomerase;		others
Bra004392	16.1614	2370.24	7.19634	0	0	ACZ57921.1	expansin protein 1	5.09261e-119	cell wall
Bra034675	781.724	2299.49	1.55658	9.00436e-12	3.10046e-11	AAG30607.1	AF314656_1/2.77197e-159/aquaporin		transporter facilitation
Bra031769	91.9137	2123.32	4.5299	6.31272e-13	2.43224e-12	XP_002889873.1	C-terminal cysteine residue is changed to A serine 1	7.10897e-55	unkown funciton
Bra006784	112.188	2111.97	4.2346	1.08358e-12	4.05032e-12	ABB02398.1	temperature-induced lipocalin	1.50459e-107	universal stress related
Bra038671	443.454	2068.63	2.22182	0	0	XP_002884856.1	predicted protein	6.91962e-89	unkown funciton
Bra027469	988.788	2068.07	1.06455	0	0	O64432.1	TRXH_BRARA/5.86558e-65/RecName: Full=Thioredoxin H-type; Short=Trx-H		unkown funciton
Bra016791	416.732	2050.82	2.29901	4.21796e-12	1.49095e-11	XP_002892674.1	hypothetical protein ARALYDRAFT_471359	6.87282e-29	unkown funciton
Bra016607	17.3976	2023.94	6.86214	0	0	XP_002890217.1	alanine aminotransferase	0	Nitrogen metabolism
Bra019672	28.8258	2019.83	6.13073	0	0	NP_172872.1	zinc finger (C3HC4-type RING finger) family protein	1.29754e-46	transcription regulation
Bra013576	9979.61	2016.08	-2.30743	0	0	ABU54828.1	peroxidase	0	signal transduction
Bra025109	50.538	1987.92	5.29775	0	0	XP_002863548.1	hypothetical protein ARALYDRAFT_494510	1.8964e-137	unkown funciton
Bra028545	148.053	1984.11	3.7443	1.64313e-14	7.61098e-14	AAK56244.1	AF367255_1 AT3g52990/F8J2_160	0	unkown funciton
Bra019639	202.247	1929.93	3.25436	0	0	CAB86897.1	fructose bisphosphate aldolase-like protein	0	carbohydrate metabolism
Bra026023	167.035	1893.04	3.50249	0	0	AAK96475.1	At1g16840/F17F16.27	1.40275e-55	unkown funciton
Bra015734	50.1074	1872.96	5.22415	1.38445e-12	5.10798e-12	XP_002889091.1	hypothetical protein ARALYDRAFT_476813	0	unkown funciton
Bra004778	106.849	1823.79	4.09329	4.51394e-12	1.59117e-11	CAA52786.1	Stearoyl-acyl carrier protein desaturase	0	lipid metabolism
Bra004950	542.566	1814.81	1.74194	9.01034e-12	3.10218e-11	BAA92258.1	plasma membrane aquaporin 1b	2.3376e-161	transporter facilitation
Bra021187	815.175	1800.26	1.14303	5.1128e-12	1.79414e-11	Q944W6.1	TCTP_BRAOL/1.40709e-81/Translationally-controlled tumor protein homolog		translation regulation
Bra011568	396.247	1799.15	2.18284	4.02678e-12	1.4251e-11	ABV26711.1	cyclophilin	1.10197e-68	others
Bra015656	61.9497	1787.6	4.85078	6.04716e-12	2.1072e-11	P39867.1	NIA1_BRANA RecName: Full=Nitrate reductase	0	oxidation reduction
Bra013269	75.5701	1736.77	4.52245	4.15668e-13	1.64827e-12	NP_567545.1	binding	1.64224e-73	unkown funciton
Bra033875	519.865	1732.69	1.7368	1.17728e-12	4.38415e-12	Q39315.1	ACBP_BRANA/1.31718e-40/RecName: Full=Acyl-CoA-binding protein; Short=ACBP		universal stress related
Bra013476	43.1278	1723.24	5.32037	1.02274e-12	3.83638e-12	XP_002869924.1	FAD-binding domain-containing protein	0	oxidation reduction
Bra002332	654.181	1719.29	1.39405	0	0	XP_002874016.1	hypothetical protein ARALYDRAFT_910122	0	unkown funciton
Bra002322	165.97	1709.38	3.36448	5.80824e-12	2.02771e-11	BAJ34051.1	unnamed protein product	3.30094e-118	unkown funciton
Bra005261	652.116	1699.43	1.38185	0	0	ABD92697.1	los	0	universal stress related
Bra022815	656.562	1679.1	1.35469	1.66434e-11	5.65456e-11	NP_180643.1	/2.27056e-111/ATGSTF9 (GLUTATHIONE S-TRANSFERASE PHI 9); copper ion binding / glutathione binding / glutathione peroxidase/ glutathione transferase		oxidation reduction
Bra017509	43.1313	1668.17	5.27339	0	0	XP_002865146.1	hypothetical protein ARALYDRAFT_494274	1.16131e-39	unkown funciton
Bra022816	618.112	1659.44	1.42476	1.04405e-12	3.91037e-12	XP_002879283.1	early dehydration-induced 13	5.77401e-115	universal stress related
Bra026452	104.338	1646.02	3.97964	2.64322e-12	9.50089e-12	NP_567742.1	PFK3 (PHOSPHOFRUCTOKINASE 3); 6-phosphofructokinase	0	kinase
Bra007089	34.2997	1609.71	5.55246	5.10702e-15	2.41711e-14	XP_002876264.1	hypothetical protein ARALYDRAFT_485873	2.39326e-50	unkown funciton
Bra027257	60.584	1605.18	4.72765	9.80772e-13	3.68762e-12	XP_002885147.1	legume lectin family protein	1.38933e-131	others
Bra006949	244.932	1580.15	2.68961	6.49126e-12	2.25604e-11	NP_190848.1	zinc finger (AN1-like) family protein	3.24774e-74	transcription regulation
Bra027996	29.8089	1574	5.72255	0	0	XP_002893765.1	hypothetical protein ARALYDRAFT_890918	3.18067e-26	unkown funciton
Bra009221	609.286	1565.82	1.36173	0	0	AAR15704.3	peroxidase	3.99857e-151	oxidation reduction
Bra016934	578.034	1548.51	1.42166	0	0	ABV89651.1	ERD15 protein	2.3982e-82	others
Bra018695	46.9765	1536.25	5.03133	5.5489e-13	2.15721e-12	XP_002894085.1	hypothetical protein ARALYDRAFT_891603	4.12425e-69	unkown funciton
Bra031809	203.924	1504.04	2.88274	4.27302e-12	1.50891e-11	XP_002865071.1	hypothetical protein ARALYDRAFT_496967	1.28697e-08	unkown funciton
Bra013091	77.8117	1469.88	4.23957	1.36824e-12	5.05109e-12	NP_565383.1	MEE14 (maternal effect embryo arrest 14)	4.10959e-85	DNA or RNA binding
Bra016792	92.0833	1463.61	3.99045	2.78e-13	1.13275e-12				no homology
Bra027991	46.9331	1462.61	4.9618	0	0	XP_002893765.1	hypothetical protein ARALYDRAFT_890918	1.02082e-32	unkown funciton
Bra038888	7.1944	1449.34	7.65431	0	0	1N7G	A Chain A, Crystal Structure Of The Gdp-Mannose 4,6-Dehydratase Ternary Complex With Nadph And Gdp-Rhamnose.	0	DNA or RNA binding
Bra018998	35.7499	1448.49	5.34047	2.2271e-13	9.22771e-13	XP_002894409.1	ANAC019	1.51987e-151	transcription regulation
Bra011808	186.188	1421.69	2.93278	5.52868e-12	1.93349e-11	BAJ33818.1	unnamed protein product	7.16461e-129	unkown funciton
Bra001123	24.0271	1402.67	5.86737	5.86198e-14	2.61111e-13	XP_002884464.1	hypothetical protein ARALYDRAFT_477741	2.41255e-97	unkown funciton
Bra035067	10.538	1379.77	7.03268	8.9262e-14	3.89879e-13	NP_565191.1	curculin-like (mannose-binding) lectin family protein	0	others
Bra008017	22.3436	1355.99	5.92334	0	0	NP_177366.1	basic helix-loop-helix (bHLH) family protein (bHLH096)	2.06363e-119	transcription regulation
Bra010263	89.5102	1349.08	3.91378	6.87828e-12	2.38562e-11	NP_194825.1	SIP3 (SOS3-INTERACTING PROTEIN 3); ATP binding / kinase/ protein kinase/ protein serine/threonine kinase	0	kinase
Bra027042	5229.53	1336.72	-1.96798	0	0				no homology
Bra003699	644.468	1336.62	1.05241	1.19695e-11	4.09583e-11				no homology
Bra017231	564.945	1319.89	1.22424	6.84564e-12	2.37507e-11	ABD92697.1	los	0	universal stress related
Bra018121	28.8611	1300.99	5.49434	0	0	XP_002872503.1	predicted protein	7.32242e-39	unkown funciton
Bra015419	39.6395	1277.41	5.01014	0	0	XP_002892283.1	hypothetical protein ARALYDRAFT_470534	7.72771e-09	unkown funciton
Bra021028	47.3512	1275.48	4.7515	6.28164e-13	2.42114e-12	XP_002870077.1	hypothetical protein ARALYDRAFT_493077	9.04692e-85	unkown funciton
Bra025805	12.3389	1275.11	6.69126	0	0	NP_564109.1	oxidoreductase, 2OG-Fe(II) oxygenase family protein	4.06953e-125	oxidation reduction
Bra002245	182.42	1268.65	2.79796	5.00044e-13	1.95757e-12	NP_197456.1	ASP2 (ASPARTATE AMINOTRANSFERASE 2); L-aspartate:2-oxoglutarate aminotransferase	0	Nitrogen metabolism
Bra023027	31.2518	1260.32	5.33371	3.07088e-13	1.24318e-12	BAJ33937.1	unnamed protein product	2.5843e-87	unkown funciton
Bra025749	198.983	1260.3	2.66306	2.40696e-12	8.6908e-12	XP_002893054.1	hypothetical protein ARALYDRAFT_472181	2.05048e-96	unkown funciton
Bra030259	289.303	1259.94	2.1227	3.3391e-12	1.19124e-11	XP_002880432.1	lipid-associated family protein	1.27479e-92	lipid metabolism
Bra001958	26.0587	1219.21	5.54804	0	0	AAP37043.1	nonsymbiotic hemoglobin	1.08031e-85	secondary metabolism
Bra036540	29.4323	1212.74	5.36472	0	0	ABL97972.1	serine-rich protein	2.12233e-80	universal stress related
Bra005291	35.1181	1172.38	5.06108	5.21804e-13	2.03652e-12	XP_002879597.1	hypothetical protein ARALYDRAFT_482594	2.11518e-67	unkown funciton
Bra029887	65.6883	1168.06	4.15233	1.23879e-12	4.59284e-12	AAF01523.1	AC009991_19/3.98984e-68/unknown protein		unkown funciton
Bra004803	17.9026	1162.46	6.02086	1.90958e-14	8.82216e-14	XP_002880082.1	hypothetical protein ARALYDRAFT_483527	1.02998e-16	unkown funciton
Bra029971	279.339	1155.14	2.04798	0	0	XP_002875996.1	ATPSK4	1.24153e-30	Energy
Bra012671	81.637	1135.94	3.79852	0	0	ABD65134.1	L-lactate dehydrogenase, putative	0	carbohydrate metabolism
Bra025984	40.6356	1125.65	4.79187	9.90764e-13	3.72256e-12	XP_002890217.1	alanine aminotransferase	0	Nitrogen metabolism
Bra029765	3286.73	1123.59	-1.54854	0	0	BAA11391.1	metallothionein-like protein	8.86931e-29	transporter facilitation
Bra034754	97.0727	1119.27	3.52734	0	0	Q09023.1	CHI2_BRANA RecName: Full=Endochitinase CH25; Flags: Precursor	0	transcription regulation
Bra020519	81.7294	1119.08	3.77531	5.21804e-13	2.03602e-12	XP_002874285.1	hypothetical protein ARALYDRAFT_910661	4.92821e-27	unkown funciton
Bra022308	455.764	1116.52	1.29265	2.64566e-12	9.50752e-12	NP_188456.1	protease inhibitor/seed storage/lipid transfer protein (LTP) family protein	9.02299e-34	protein degradation
Bra001953	2425.94	1108.11	-1.13044	0	0	BAJ34053.1	unnamed protein product	2.3674e-77	unkown funciton
Bra000670	184.951	1101.3	2.57399	6.57252e-13	2.52472e-12				no homology
Bra020696	155.749	1080.23	2.79404	9.80548e-13	3.68765e-12	AAO22703.1	unknown protein	6.97287e-34	unkown funciton
Bra023392	432.74	1067.59	1.30278	8.2958e-12	2.86172e-11	XP_002873600.1	/2.23341e-86/hypothetical protein ARALYDRAFT_488130		unkown funciton
Bra039946	2836.16	1062.23	-1.41684	0	0	XP_002878660.1	hypothetical protein ARALYDRAFT_481185	1.32308e-08	unkown funciton
Bra020576	71.204	1061.46	3.89795	4.79172e-13	1.88117e-12	XP_002874347.1	hypoxia-responsive family protein	1.13877e-36	universal stress related
Bra040780	311.541	1054.32	1.75881	2.04836e-12	7.42539e-12	XP_002884233.1	expressed protein	3.46757e-17	unkown funciton
Bra020325	504.991	1044.25	1.04813	5.53046e-12	1.9339e-11	XP_002866324.1	UDP-glucuronic acid decarboxylase	0	carbohydrate metabolism
Bra035677	318.131	1025.82	1.68909	7.26708e-12	2.51582e-11	XP_002284357.1	PREDICTED: hypothetical protein	2.89245e-44	unkown funciton
Bra038451	155.328	1006.53	2.696	4.11182e-12	1.45439e-11	NP_974559.5	metal ion binding	3.99639e-27	transporter facilitation
Bra027569	105.024	994.395	3.2431	9.19486e-13	3.46822e-12	NP_199286.1	haloacid dehalogenase-like hydrolase family protein	3.95423e-135	carbohydrate metabolism
Bra019961	259.034	978.437	1.91734	2.68118e-12	9.62975e-12	XP_002892549.1	hypothetical protein ARALYDRAFT_888272	6.61801e-42	unkown funciton
Bra035194	173.195	970.206	2.4859	8.6946e-12	2.99638e-11	XP_002887845.1	hypothetical protein ARALYDRAFT_477244	5.68679e-100	unkown funciton
Bra011087	160.993	965.495	2.58427	3.5929e-12	1.27792e-11	BAJ33902.1	unnamed protein product	7.08186e-180	unkown funciton
Bra004435	11.3812	953.945	6.38919	3.21964e-14	1.46729e-13	BAJ33672.1	unnamed protein product	5.40501e-80	unkown funciton
Bra011656	17.3026	952.953	5.78334	4.61852e-14	2.07577e-13	XP_002867039.1	DNAJ heat shock N-terminal domain-containing protein	3.42014e-68	universal stress related
Bra024848	203.835	944.566	2.21225	9.33254e-13	3.51724e-12	XP_002875095.1	endoxyloglucan transferase	5.83462e-167	cell wall
Bra038486	32.7002	931.264	4.83182	4.93384e-13	1.93268e-12	XP_002868119.1	aspartyl protease family protein	1.27526e-172	protein degradation
Bra023707	403.281	915.156	1.18223	4.02678e-12	1.42526e-11	ABV89631.1	aluminum-induced protein	3.23636e-86	universal stress related
Bra025819	5486.27	909.805	-2.5922	0	0	AAR23753.1	dehydrin	2.32652e-83	universal stress related
Bra009542	260.447	907.361	1.80069	4.58034e-12	1.6135e-11	XP_002874006.1	/1.19352e-124/hypothetical protein ARALYDRAFT_488966		unkown funciton
Bra016653	154.341	888.43	2.52514	0	0	AAR08913.2	pyrophosphate-energized vacuolar membrane proton pump	0	transporter facilitation
Bra028814	262.572	883.606	1.75069	0	0	NP_201219.1	RPS28 (RIBOSOMAL PROTEIN S28); structural constituent of ribosome	4.03584e-21	translation regulation
Bra005731	285.094	858.87	1.591	1.63447e-12	5.98618e-12	AAO64770.1	At5g02580	4.39922e-36	unkown funciton
Bra005720	306.545	854.987	1.4798	0	0	P56170.1	MT23_BRAJU/5.19968e-29/RecName: Full=Metallothionein-like protein type 2, MT2-22		transporter facilitation
Bra013088	32.0116	852.453	4.73496	8.65974e-14	3.78551e-13	BAJ34348.1	/2.2242e-24/unnamed protein product		unkown funciton
Bra031205	414.516	844.024	1.02586	0	0	NP_850015.1	/1.84478e-81/RD2		universal stress related
Bra037958	1995.99	836.225	-1.25514	0	0	AAY53488.1	epithiospecifier protein	2.57788e-156	universal stress related
Bra034402	2827.25	834.299	-1.76076	0	0	ADK13090.1	annexin 1	1.30965e-174	lipid metabolism
Bra025636	28.4392	833.145	4.87261	0	0	XP_002870743.1	predicted protein	1.13589e-128	unkown funciton
Bra039301	144.733	832.683	2.52437	4.1469e-12	1.46615e-11	CAA64896.1	transmembrane channel protein	1.01867e-137	transporter facilitation
Bra004527	38.5662	829.054	4.42606	1.00231e-12	3.76285e-12	XP_002882075.1	hypothetical protein ARALYDRAFT_483815	6.59325e-118	unkown funciton
Bra019632	383.595	821.768	1.09915	0	0	NP_190870.1	STV1 (SHORT VALVE1); structural constituent of ribosome	7.69988e-54	translation regulation
Bra036575	33.5203	819.182	4.61108	0	0	NP_198006.1	MSS1; carbohydrate transmembrane transporter/ hexose:hydrogen symporter/ high-affinity hydrogen:glucose symporter/ sugar:hydrogen symporter	0	transporter facilitation
Bra024346	174.754	817.11	2.22521	3.93396e-12	1.39504e-11	ABD47519.1	annexin 2	3.32475e-175	lipid metabolism
Bra036259	6.93506	810.064	6.86799	2.36034e-13	9.72802e-13	AAP58393.1	glutathione S-transferase 3	7.77378e-104	Nitrogen metabolism
Bra036408	24.3325	808.457	5.05421	6.0174e-14	2.67512e-13				no homology
Bra023820	126.316	807.28	2.67603	0	0	XP_002885510.1	hypothetical protein ARALYDRAFT_318984	2.68019e-113	unkown funciton
Bra027425	191.037	802.093	2.06992	0	0	NP_566458.1	AGP12 (ARABINOGALACTAN PROTEIN 12)	4.63566e-14	others
Bra010332	157.513	795.931	2.33717	2.79576e-12	1.00277e-11	XP_002867417.1	predicted protein	2.90355e-91	unkown funciton
Bra011645	98.4106	788.591	3.00239	0	0	XP_002867050.1	GTP-binding 2	8.13607e-106	small molecular
Bra032550	12.8321	776.321	5.91882	5.26246e-14	2.35161e-13	XP_002892163.1	coproporphyrinogen III oxidase	0	secondary metabolism
Bra001154	376.962	776.065	1.04176	5.24914e-12	1.83996e-11	XP_002882425.1	60S ribosomal protein L22-2	2.30893e-45	translation regulation
Bra033603	382.546	769.899	1.00903	1.69242e-12	6.18567e-12	NP_001119144.1	40S ribosomal protein S25 (RPS25E)	5.82255e-33	translation regulation
Bra034212	6.36853	769.34	6.91652	1.73639e-13	7.32084e-13	NP_192260.1	/1.15537e-96/RMA1; protein binding / ubiquitin-protein ligase/ zinc ion binding		protein degradation
Bra024879	138.196	765.508	2.4697	1.46394e-12	5.38447e-12	XP_002875076.1	hypothetical protein ARALYDRAFT_904347	3.55445e-77	unkown funciton
Bra037506	29.5124	762.086	4.69056	3.59934e-13	1.4378e-12	BAJ34265.1	unnamed protein product	0	unkown funciton
Bra034691	63.5025	757.055	3.57551	5.40012e-13	2.10218e-12	XP_002884960.1	DNAJ heat shock N-terminal domain-containing protein	8.71757e-64	universal stress related
Bra011585	131.974	756.925	2.51989	1.67755e-12	6.13199e-12	AAG30607.1	AF314656_1/6.8276e-158/aquaporin		transporter facilitation
Bra030069	87.4626	755.493	3.11068	0	0	ABL97965.1	putative nuclear transport factor 2	5.3052e-66	transporter facilitation
Bra009947	278.871	753.689	1.43437	0	0	NP_198122.4	structural constituent of ribosome	1.44932e-39	translation regulation
Bra014955	329.478	751.946	1.19045	0	0	CAA72005.1	nodulin-35 homologue	4.24788e-148	unkown funciton
Bra010194	27.8918	750.165	4.7493	0	0	NP_192765.1	wound-responsive family protein	2.89548e-27	universal stress related
Bra002822	90.1397	747.88	3.05257	5.7403e-12	2.00509e-11	BAB11262.1	pyruvate kinase	0	carbohydrate metabolism
Bra024374	63.7028	744.5	3.54684	3.57492e-14	1.62526e-13	NP_201331.1	GCL1 (GCR2-LIKE 1); catalytic	0	others
Bra021200	325.408	738.634	1.18261	1.59872e-13	6.78612e-13	NP_188299.1	ATEBP (ETHYLENE-RESPONSIVE ELEMENT BINDING PROTEIN); DNA binding / protein binding / transcription activator/ transcription factor	2.37103e-89	transcription regulation
Bra006280	73.5942	738.193	3.32633	0	0	AAP37696.1	At5g15120	5.96149e-131	unkown funciton
Bra011930	219.19	732.522	1.74069	7.7005e-13	2.93227e-12	XP_002862747.1	hypothetical protein ARALYDRAFT_333229	6.4437e-44	unkown funciton
Bra022803	71.2383	722.048	3.34137	6.8745e-13	2.63439e-12	BAJ33716.1	unnamed protein product	0	unkown funciton
Bra024265	331.724	720.274	1.11856	5.30754e-12	1.85901e-11	XP_002866593.1	/1.86659e-43/protease inhibitor/seed storage/lipid transfer protein family protein		protein degradation
Bra024075	213.093	715.452	1.74737	1.01252e-13	4.40503e-13	NP_194773.1	GAE1 (UDP-D-GLUCURONATE 4-EPIMERASE 1); UDP-glucuronate 4-epimerase/ catalytic	0	carbohydrate metabolism
Bra022839	235.502	713.713	1.5996	0	0	XP_002881172.1	pfkB-type carbohydrate kinase family protein	1.22579e-172	kinase
Bra006395	124.524	710.085	2.51157	3.66108e-12	1.30087e-11	BAJ34372.1	unnamed protein product	0	unkown funciton
Bra041021	1471.13	708.379	-1.05433	6.01744e-90	7.8591e-89	XP_002884538.1	predicted protein	1.33077e-16	unkown funciton
Bra025385	11.343	697.473	5.94226	1.65201e-13	6.99558e-13	AAL84976.1	/1.84402e-162/AT3g29240/MXO21_9		unkown funciton
Bra017276	227.094	696.649	1.61714	3.84936e-12	1.3658e-11	XP_002879584.1	hypothetical protein ARALYDRAFT_482567	1.30824e-84	unkown funciton
Bra026150	343.363	690.317	1.00752	8.39106e-13	3.18081e-12	XP_002298214.1	predicted protein	1.96113e-10	unkown funciton
Bra040216	170.203	689.077	2.01741	4.97668e-12	1.74907e-11	XP_002882419.1	rubber elongation factor family protein	9.43571e-126	translation regulation
Bra037667	96.2707	687.025	2.83519	3.82138e-13	1.52136e-12	NP_850409.1	ARL (ARGOS-LIKE)	2.17207e-27	signal transduction
Bra004126	277.649	676.39	1.28459	5.48384e-12	1.91802e-11	XP_002888446.1	hypothetical protein ARALYDRAFT_475676	7.93749e-50	unkown funciton
Bra018150	100.702	675.132	2.74507	8.6946e-12	2.9967e-11	NP_566891.1	glycerol-3-phosphate transporter, putative / glycerol 3-phosphate permease, putative	0	transporter facilitation
Bra035211	186.342	674.459	1.85577	0	0	XP_002874703.1	ATGPX6	4.31332e-81	oxidation reduction
Bra003635	4.79998	670.97	7.12708	3.66374e-14	1.66492e-13	XP_002889216.1	hypothetical protein ARALYDRAFT_895785	0	unkown funciton
Bra011236	79.487	667.142	3.0692	0	0	AAL37170.1	AF319169_1 CBL-interacting protein kinase	0	kinase
Bra014751	212.864	660.291	1.63317	2.49134e-13	1.02139e-12	NP_567020.1	UBC14 (ubiquitin-conjugating enzyme 14); ubiquitin-protein ligase	4.16097e-78	protein degradation
Bra006339	47.6793	656.901	3.78424	5.77316e-15	2.72472e-14	XP_002873758.1	AT5g16110	9.34816e-57	unkown funciton
Bra009543	123.191	652.191	2.40439	0	0	XP_002871018.1	hypothetical protein ARALYDRAFT_908188	1.12142e-58	unkown funciton
Bra026273	62.3297	650.605	3.38379	2.12052e-13	8.81241e-13	ABV89634.1	wound-responsive protein-related	1.58567e-30	universal stress related
Bra004620	45.2112	645.597	3.83588	2.00284e-13	8.35926e-13	AAM61257.1	calmodulin-like protein	5.4463e-65	signal transduction
Bra009829	32.6568	639.806	4.29218	7.68274e-13	2.9262e-12	XP_002872151.1	hypothetical protein ARALYDRAFT_489379	7.86973e-74	unkown funciton
Bra003738	61.1196	639.642	3.38756	5.554e-12	1.94192e-11	XP_002887860.1	NADP-malic enzyme 4	0	carbohydrate metabolism
Bra040186	9.27816	639.628	6.10725	1.33227e-15	6.42745e-15	AAK43710.1	AF358915_1/3.5446e-138/phosphoenolpyruvate carboxylase kinase 2		carbohydrate metabolism
Bra023925	11.0528	639.226	5.85384	0	0	BAJ33628.1	/1.8538e-178/unnamed protein product		unkown funciton
Bra000211	67.7905	631.53	3.2197	0	0	NP_850337.1	CYP98A3 (cytochrome P450, family 98); monooxygenase/ p-coumarate 3-hydroxylase	0	oxidation reduction
Bra013450	164.575	626.323	1.92816	6.20592e-12	2.16064e-11	BAJ33888.1	unnamed protein product	6.502e-63	unkown funciton
Bra014852	106.808	621.73	2.54127	4.79616e-13	1.88175e-12	XP_002877951.1	universal stress protein family protein	5.97594e-79	universal stress related
Bra029267	4893.55	618.718	-2.98353	0	0	XP_002864786.1	hypothetical protein ARALYDRAFT_496412	9.89658e-87	unkown funciton
Bra016719	292.13	613.146	1.06962	5.29e-12	1.85307e-11	AAF79399.1	AC068197_9/2.45728e-39/F16A14.14		unkown funciton
Bra020079	160.214	609.108	1.9267	0	0	NP_568389.1	RPT6A (REGULATORY PARTICLE TRIPLE-A ATPASE 6A); ATPase	0	Energy
Bra039384	99.8915	607.049	2.60338	1.15397e-12	4.30235e-12	XP_002884960.1	DNAJ heat shock N-terminal domain-containing protein	5.0238e-64	universal stress related
Bra029642	195.345	599.157	1.61691	0	0	NP_566304.1	PUB9 (PLANT U-BOX 9); ubiquitin-protein ligase	0	protein degradation
Bra021433	44.3723	598.66	3.75401	1.85185e-13	7.78095e-13	AAP37970.1	seed specific protein Bn15D17A	1.03022e-120	unkown funciton
Bra006981	179.397	597.754	1.7364	0	0	XP_002877908.1	hypothetical protein ARALYDRAFT_906710	1.1139e-15	unkown funciton
Bra005216	23.2506	592.677	4.67191	2.1072e-13	8.77533e-13	AAD39374.1	AF118383_1/8.33854e-126/plasma membrane intrinsic protein 2		others
Bra003592	22.9374	588.696	4.68175	0	0	NP_178207.1	J8; heat shock protein binding / unfolded protein binding	6.19849e-68	universal stress related
Bra024935	171.478	587.542	1.77666	1.37579e-12	5.07779e-12	ADD10748.1	phytocystatin 5	2.41839e-50	protein degradation
Bra001886	109.939	576.685	2.39108	8.64864e-13	3.26914e-12	NP_188923.1	ELIP1 (EARLY LIGHT-INDUCABLE PROTEIN); chlorophyll binding	4.81739e-75	others
Bra021241	192.322	573.202	1.57552	0	0	Q9FUZ1.1	S-adenosylmethionine synthase 2		Nitrogen metabolism
